# Supplementary material for: Microwave assisted [RuCl2(p-cymene)2]2 catalyzed regioselective endo-tandem cyclization involving imine and alkyne activation: an approach to benzo[4,5]imidazo[2,1-a]pyridine scaffold
Source: Royal Society of Chemistry journal article supplement (doi:10.1039/c4ra02581d), 2014-01-01
Supplement: c4ra02581d1.pdf [file c4ra02581d1.pdf]

# Supporting Information

## Microwave Assisted $[\text{RuCl}_2(p\text{-cymene})_2]_2$ Catalyzed Regioselective *Endo*-Tandem Cyclization Involving Imine and Alkyne Activation: An Approach to benzo[4,5]imidazo[2,1-*a*]pyridine Scaffold

Sudipta Kumar Manna <sup>a</sup> and Gautam Panda <sup>a,b\*</sup>

<sup>a</sup>Medicinal and Process Chemistry Division, CSIR-Central Drug Research Institute,  
BS 10/1, Sector 10, Jankipuram extension, Sitapur Road, Lucknow 226031, India.

<sup>b</sup>Academy of Scientific and Innovative Research, New Delhi 110001, India.

Fax: (+91)-522-262-3405; Phone: (+91)-522-261-2411-18 (8 line)

E-mail : [gautam.panda@gmail.com](mailto:gautam.panda@gmail.com); [gautam\\_panda@cdri.res.in](mailto:gautam_panda@cdri.res.in)

|             |      |
|-------------|------|
| 1. Contents | 1-6  |
| 2. Spectra  | 7-79 |

**Figure 1:**  $^1\text{H}$  -NMR Spectrum of **3b**.

**Figure 2:**  $^{13}\text{C}$  -NMR Spectrum of **3b**.

**Figure 3:**  $^1\text{H}$  -NMR Spectrum of **4a**.

**Figure 4:**  $^{13}\text{C}$  -NMR Spectrum of **4a**.

**Figure 5:**  $^1\text{H}$  -NMR Spectrum of **4b**.

**Figure 6:**  $^{13}\text{C}$  -NMR Spectrum of **4b**.

**Figure 7:**  $^1\text{H}$  -NMR Spectrum of **4c**.

**Figure 8:**  $^{13}\text{C}$  -NMR Spectrum of **4c**.

**Figure 9:**  $^1\text{H}$  -NMR Spectrum of **4d**.

**Figure 10:**  $^{13}\text{C}$  -NMR Spectrum of **4d**.

**Figure 11:**  $^1\text{H}$  -NMR Spectrum of **4e**.

**Figure 12:**  $^{13}\text{C}$  -NMR Spectrum of **4e**.

**Figure 13:**  $^1\text{H}$  -NMR Spectrum of **4f**.

**Figure 14:**  $^{13}\text{C}$  -NMR Spectrum of **4f**.

**Figure 15:**  $^1\text{H}$  -NMR Spectrum of **4g**.

**Figure 16:**  $^{13}\text{C}$  -NMR Spectrum of **4g**.

**Figure 17:**  $^1\text{H}$  -NMR Spectrum of **4h**.

**Figure 18:**  $^{13}\text{C}$  -NMR Spectrum of **4h**.

**Figure 19:**  $^1\text{H}$  -NMR Spectrum of **4i**.

**Figure 20:**  $^{13}\text{C}$  -NMR Spectrum of **4i**.

**Figure 21:**  $^1\text{H}$  -NMR Spectrum of **4j**.

**Figure 22:**  $^{13}\text{C}$  -NMR Spectrum of **4j**.

**Figure 23:**  $^1\text{H}$  -NMR Spectrum of **4k**.

**Figure 24:**  $^{13}\text{C}$  -NMR Spectrum of **4k**.

**Figure 25:**  $^1\text{H}$  -NMR Spectrum of **5a**.

**Figure 26:**  $^{13}\text{C}$  -NMR Spectrum of **5a**.

**Figure 27:**  $^1\text{H}$  -NMR Spectrum of **5b**.

**Figure 28:**  $^{13}\text{C}$  -NMR Spectrum of **5b**.

**Figure 29:**  $^1\text{H}$  -NMR Spectrum of **5c**.

**Figure 30:**  $^{13}\text{C}$  -NMR Spectrum of **5c**.

**Figure 31:**  $^1\text{H}$  -NMR Spectrum of **5d**.

**Figure 32:**  $^{13}\text{C}$  -NMR Spectrum of **5d**.

**Figure 33:** DEPT-I -Spectrum of **5d**.

**Figure 34:** DEPT-II -Spectrum of **5d**.

**Figure 35:** HSQC -Spectrum of **5d**.

**Figure 36:** HMBC -Spectrum of **6d**.

**Figure 37:** COSY -Spectrum of **5d**.

**Figure 38:**  $^1\text{H}$  -NMR Spectrum of **5e**.

**Figure 39:**  $^{13}\text{C}$  -NMR Spectrum of **5e**.

**Figure 40:**  $^1\text{H}$  -NMR Spectrum of **5f**.

**Figure 41:**  $^{13}\text{C}$  -NMR Spectrum of **5f**.

**Figure 42:**  $^1\text{H}$  -NMR Spectrum of **5g**.

**Figure 43:**  $^{13}\text{C}$  -NMR Spectrum of **5g**.

**Figure 44:** DEPT-I -Spectrum of **5g**.

**Figure 45:** DEPT-II -Spectrum of **5g**.

**Figure 46:** HSQC -Spectrum of **5g**.

**Figure 47:** HMBC -Spectrum of **5g**.

**Figure 48:** COSY -Spectrum of **5g**.

**Figure 49:**  $^1\text{H}$  -NMR Spectrum of **5h**.

**Figure 50:**  $^{13}\text{C}$  -NMR Spectrum of **5h**.

**Figure 51:**  $^1\text{H}$  -NMR Spectrum of **5i**.

**Figure 52:**  $^{13}\text{C}$  -NMR Spectrum of **5i**.

**Figure 63:**  $^1\text{H}$  -NMR Spectrum of **5j**.

**Figure 54:**  $^{13}\text{C}$  -NMR Spectrum of **5j**.

**Figure 55:**  $^1\text{H}$  -NMR Spectrum of **5k**.

**Figure 56:**  $^{13}\text{C}$  -NMR Spectrum of **5k**.

**Figure 57:**  $^1\text{H}$  -NMR Spectrum of **5l**.

**Figure 58:**  $^{13}\text{C}$  -NMR Spectrum of **5l**.

**Figure 59:**  $^1\text{H}$  -NMR Spectrum of **5m**.

**Figure 60:**  $^{13}\text{C}$  -NMR Spectrum of **5m**.

**Figure 61:**  $^1\text{H}$  -NMR Spectrum of **5n**.

**Figure 62:**  $^{13}\text{C}$  -NMR Spectrum of **5n**.

**Figure 63:**  $^1\text{H}$  -NMR Spectrum of **5o**.

**Figure 64:**  $^1\text{H}$  -NMR Spectrum of **5p**.

**Figure 65:**  $^1\text{H}$  -NMR Spectrum of **5q**.

**Figure 66:**  $^{13}\text{C}$  -NMR Spectrum of **5q**.

**Figure 67:**  $^1\text{H}$  -NMR Spectrum of **5r**.

**Figure 68:**  $^{13}\text{C}$  -NMR Spectrum of **5r**.

**Figure 69:**  $^1\text{H}$  -NMR Spectrum of **5s**.

**Figure 70:**  $^1\text{H}$  -NMR Spectrum of **U**.

**Figure 71:**  $^{13}\text{C}$  -NMR Spectrum of **U**.

**Figure 72:** DEPT-I -Spectrum of **U**.

**Figure 73:** DEPT-II -Spectrum of **U**.

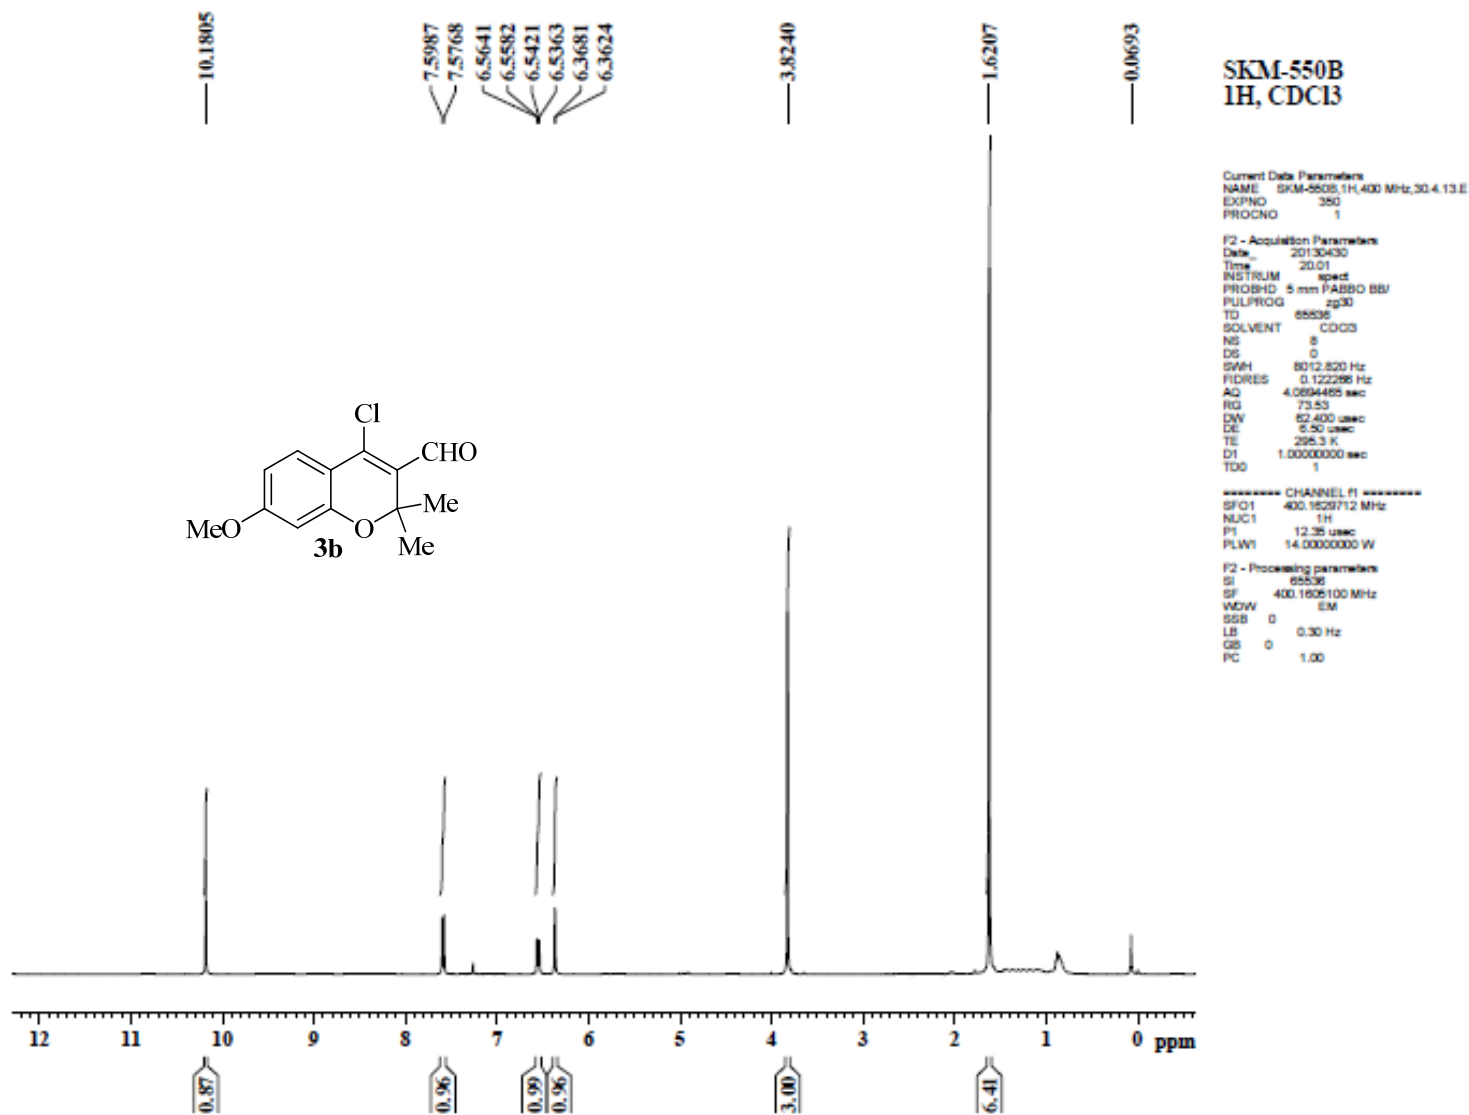

**Figure 1:** <sup>1</sup>H -NMR Spectrum of **3b**.

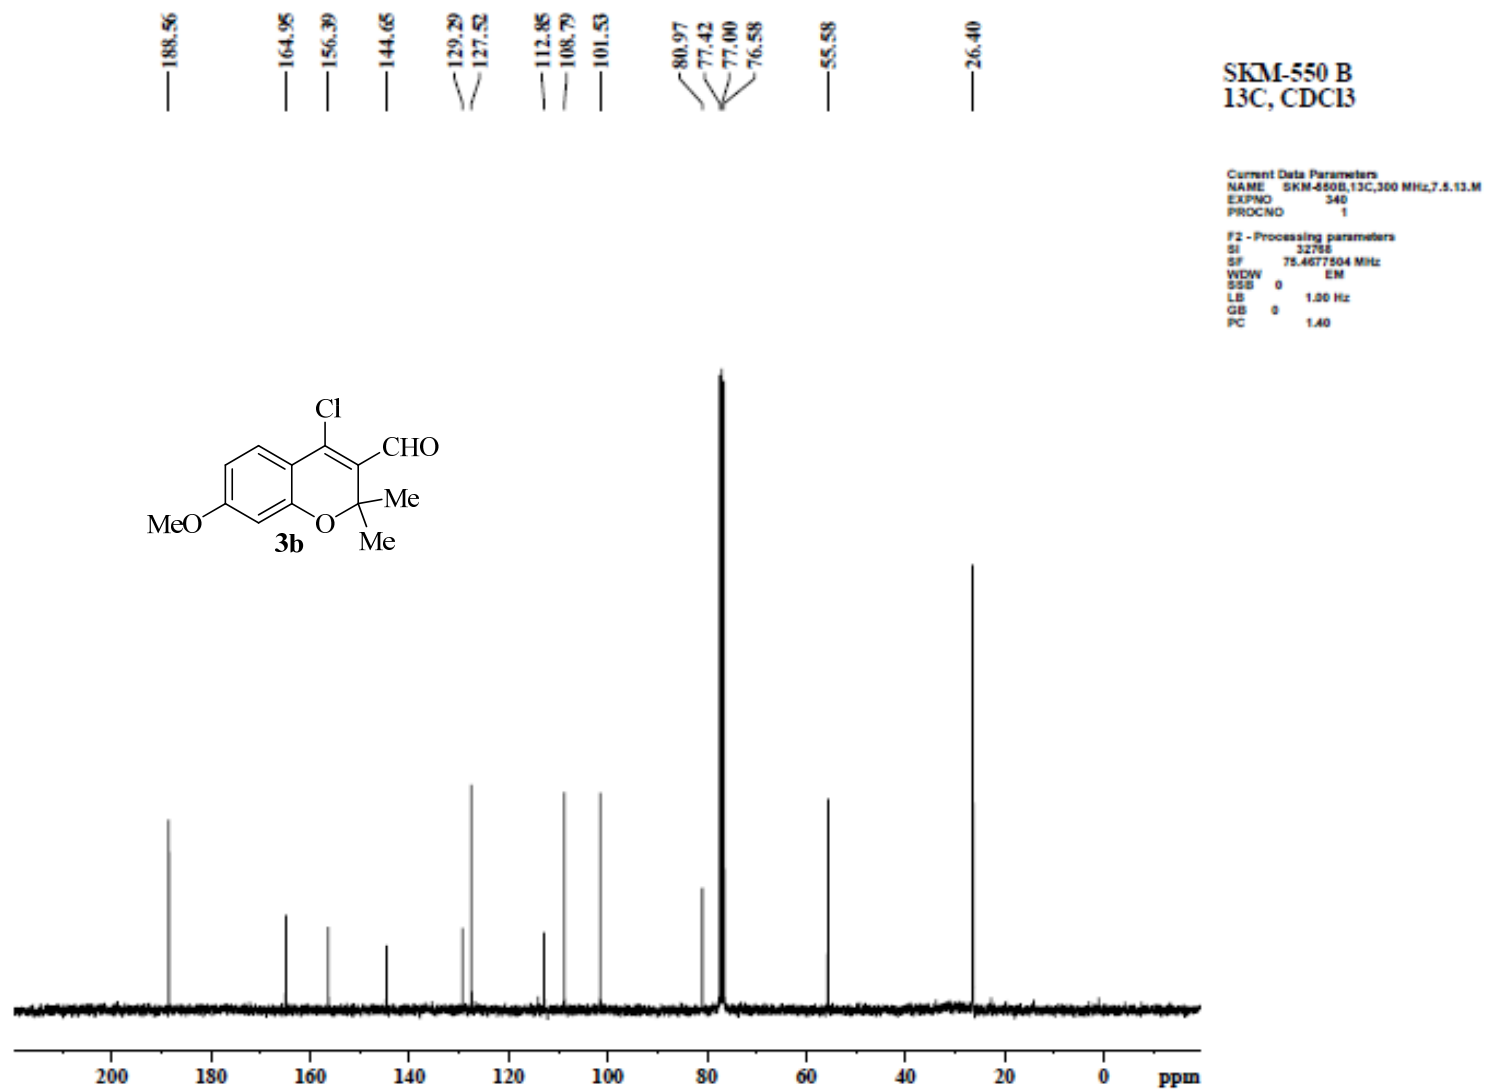

**Figure 2:** <sup>13</sup>C -NMR Spectrum of **3b**.



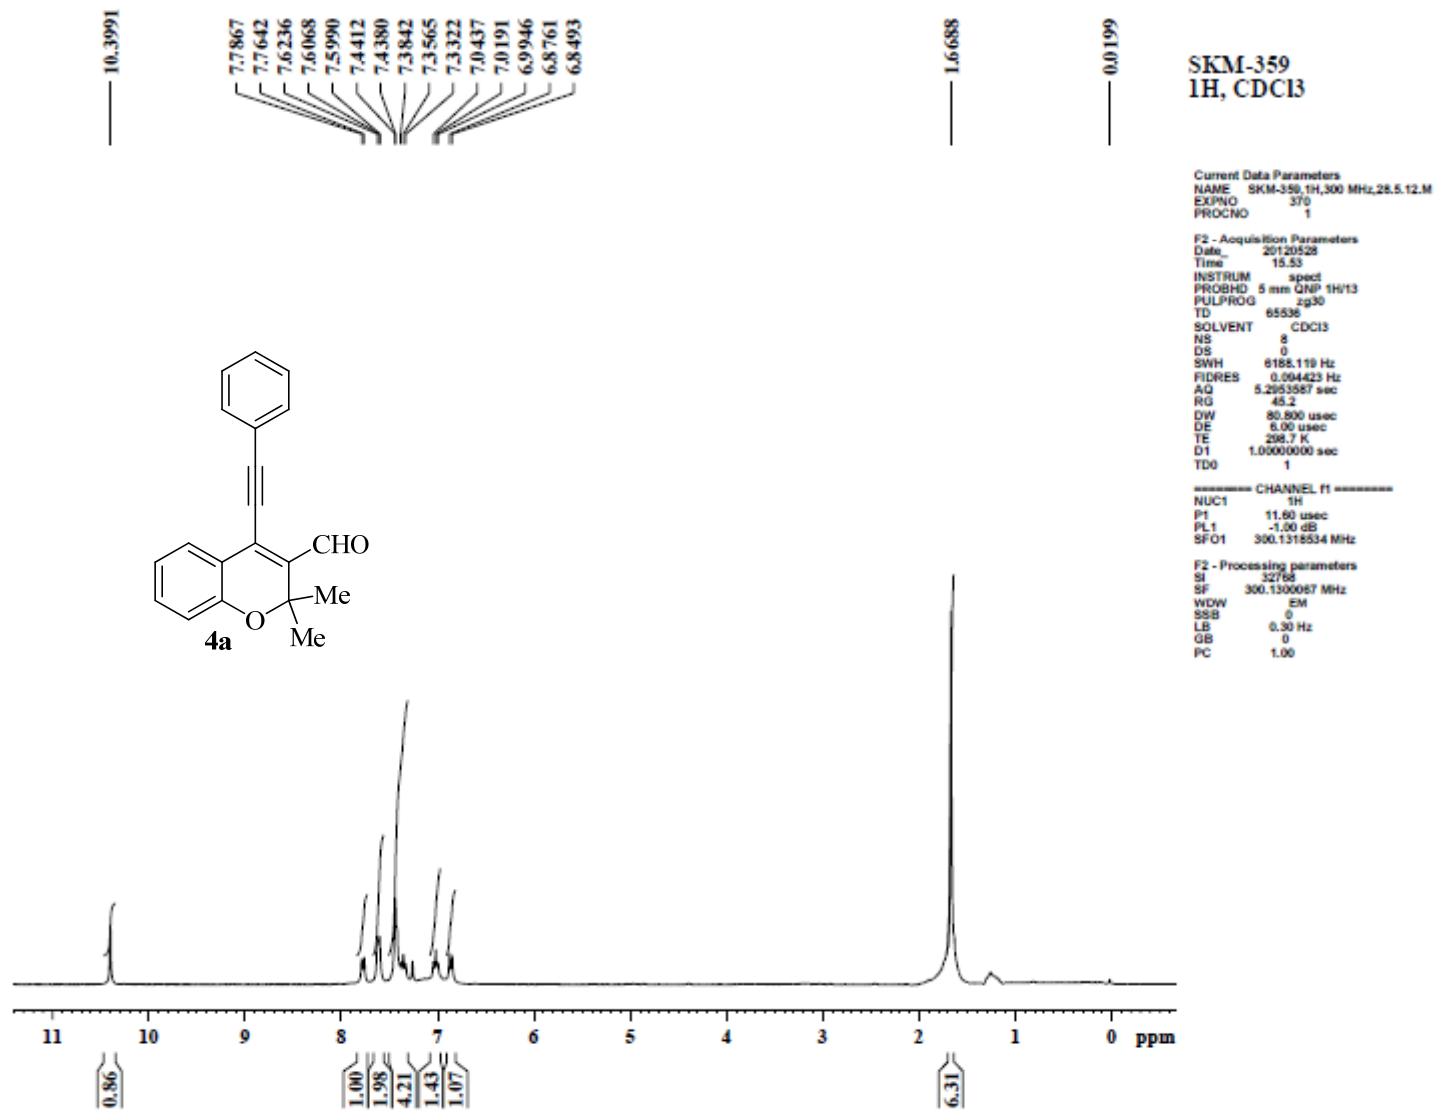

**Figure 3: <sup>1</sup>H -NMR Spectrum of 4a.**

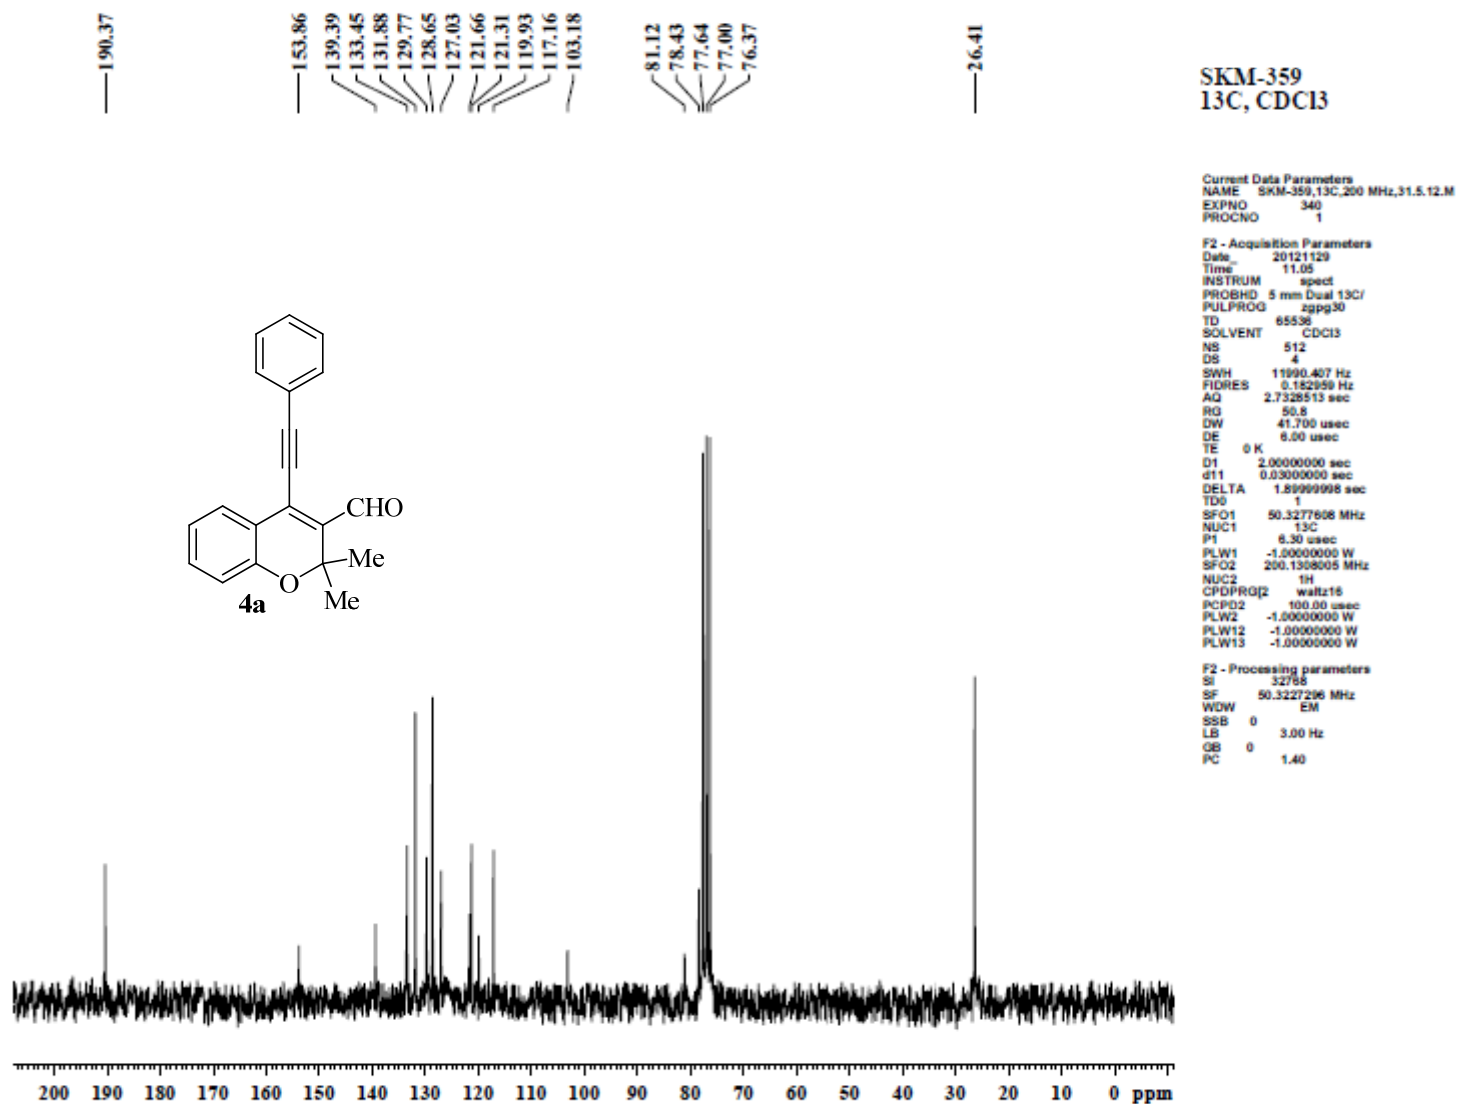

**Figure 4:** <sup>13</sup>C -NMR Spectrum of **4a**.

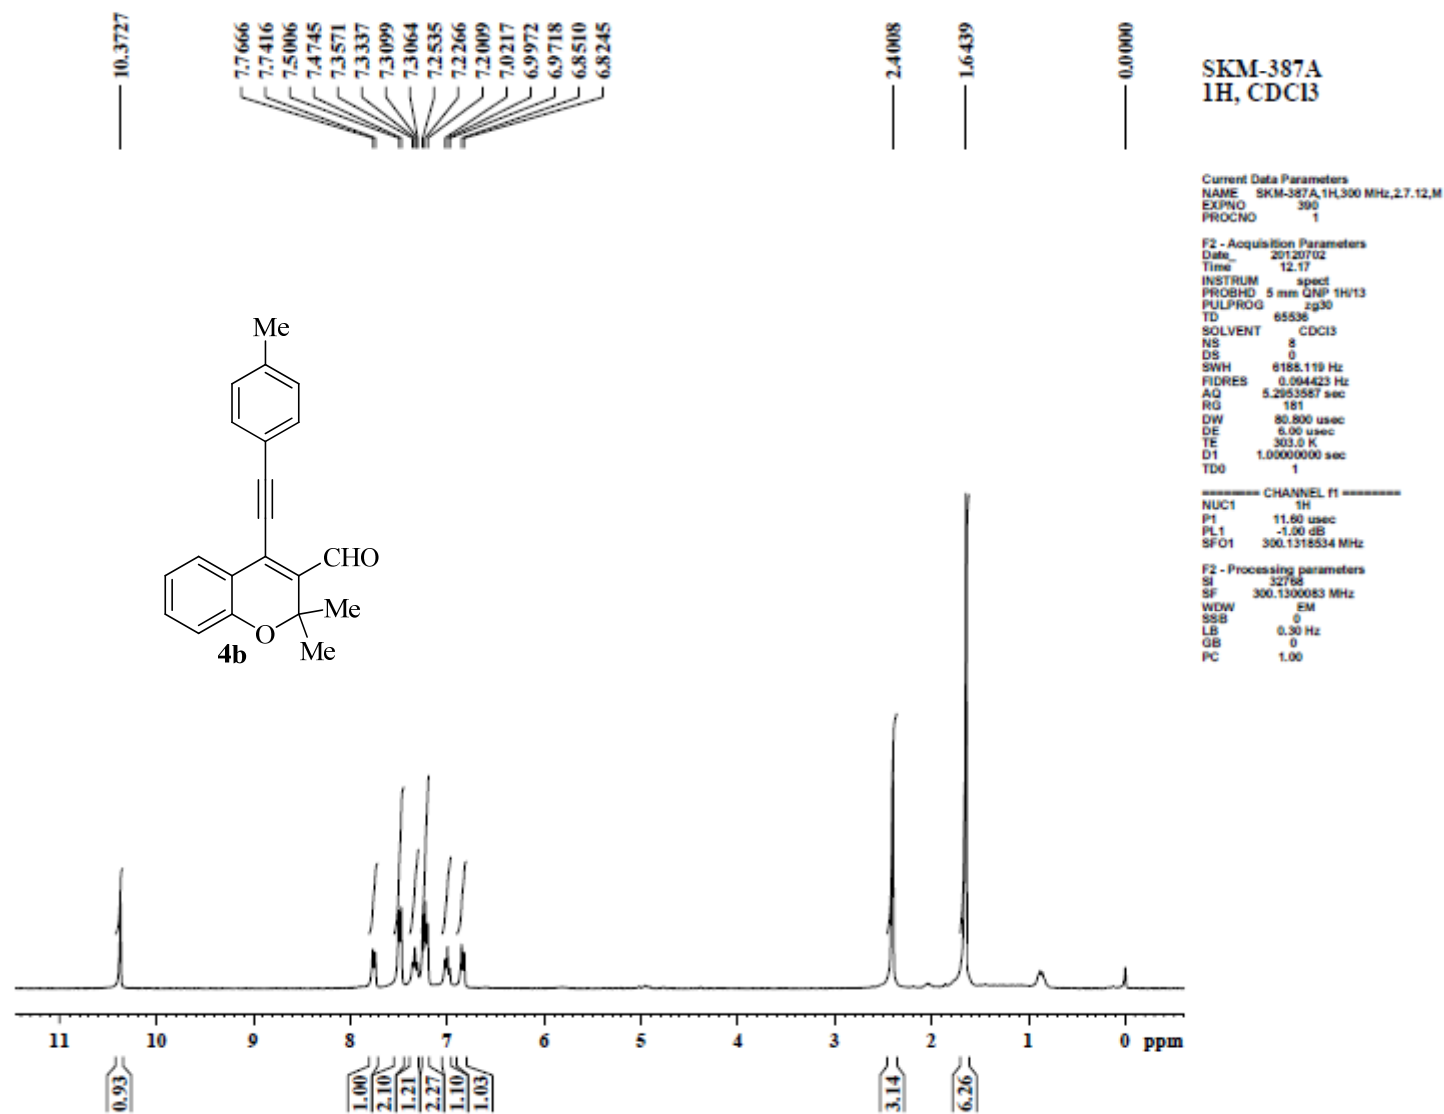

**Figure 5:** <sup>1</sup>H -NMR Spectrum of **4b**.

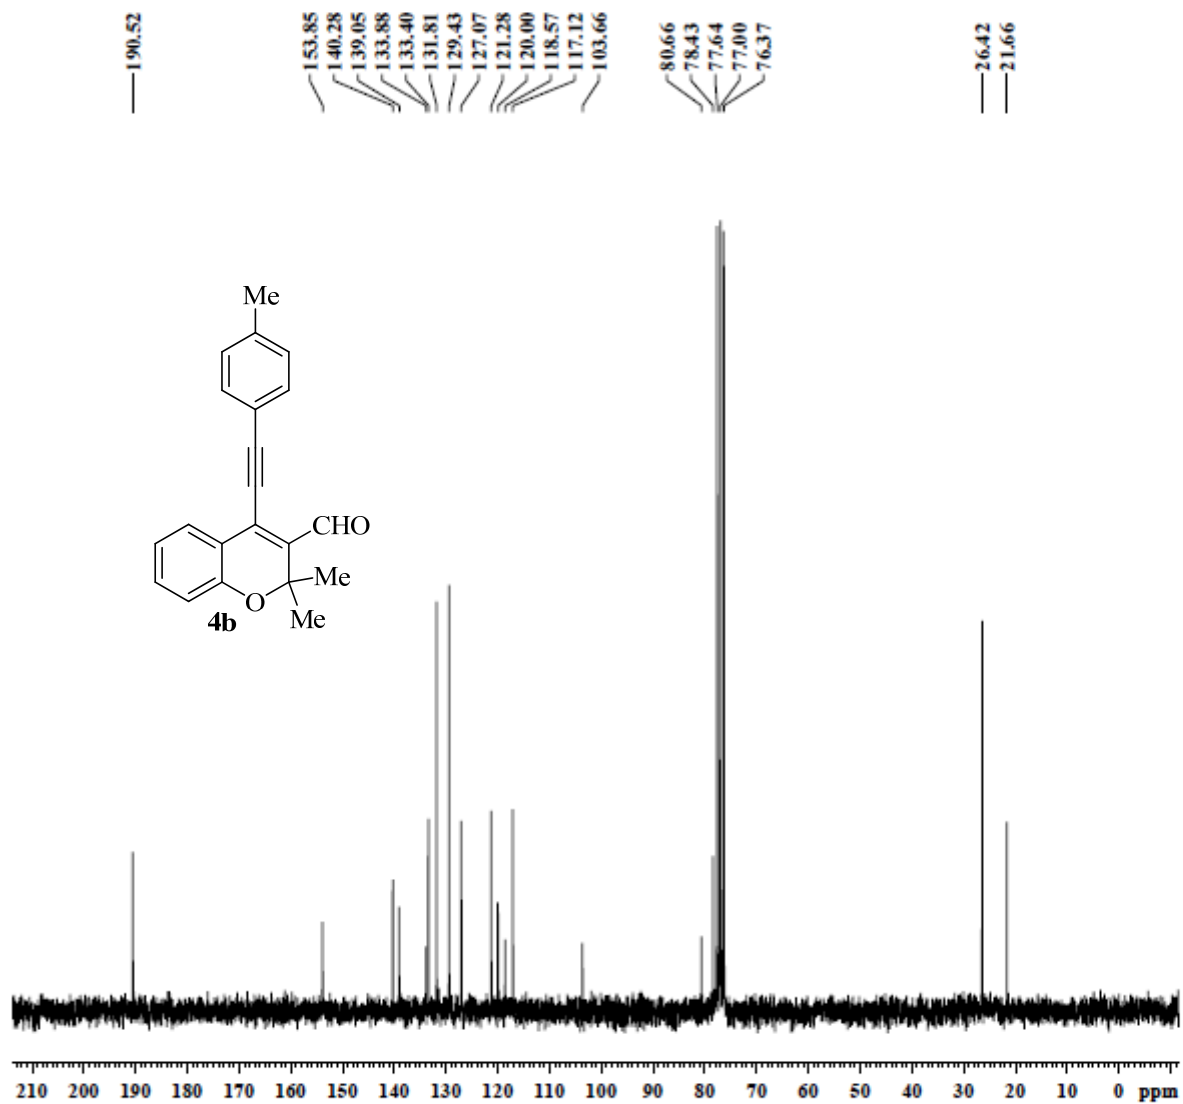

SKM-387A  
13C, CDCl3

Current Data Parameters  
NAME SKM-387A,13C,200 MHz,4.7.12.M  
EXPNO 320  
PROCNO 1

F2 - Acquisition Parameters  
Date\_ 20120704  
Time 14.25  
INSTRUM spect  
PROBHD 5 mm Dual 13C/  
PULPROG zgpg30  
TD 65536  
SOLVENT CDCl3  
NS 512  
DS 4  
SWH 11900.407 Hz  
FIDRES 0.18280 Hz  
AQ 2.7328513 sec  
RG 57  
DW 41.700 usec  
DE 8.00 usec  
TE 0 K  
D1 2.0000000 sec  
d11 0.0300000 sec  
DELTA 1.8999999 sec  
TDO 1  
SFO1 50.3277608 MHz  
NUC1 13C  
P1 8.20 usec  
PLW1 -1.0000000 W  
SFO2 200.1308005 MHz  
NUC2 1H  
CPDPRG2 waltz16  
PCPD2 100.00 usec  
PLW2 -1.0000000 W  
PLW12 -1.0000000 W  
PLW13 -1.0000000 W

F2 - Processing parameters  
SI 32768  
SF 50.327296 MHz  
WDW EM  
SSB 0  
LB 1.00 Hz  
GB 0  
PC 1.40

Figure 6: <sup>13</sup>C -NMR Spectrum of **4b**.

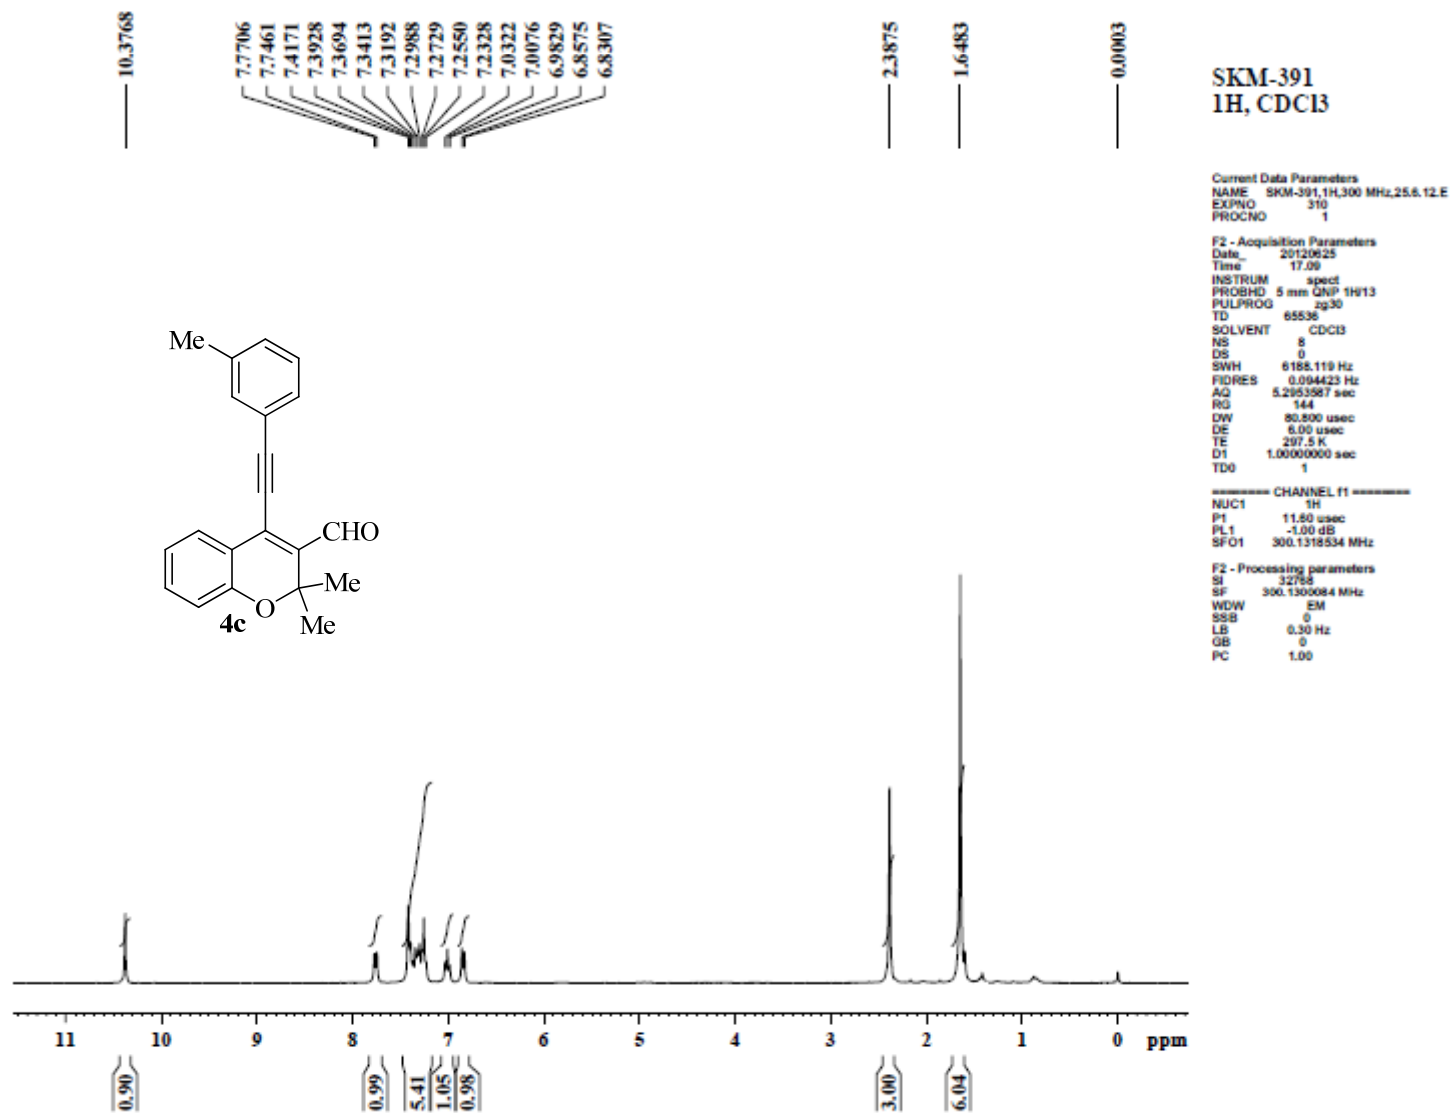

**Figure 7:**  $^1\text{H}$ -NMR Spectrum of **4c**.

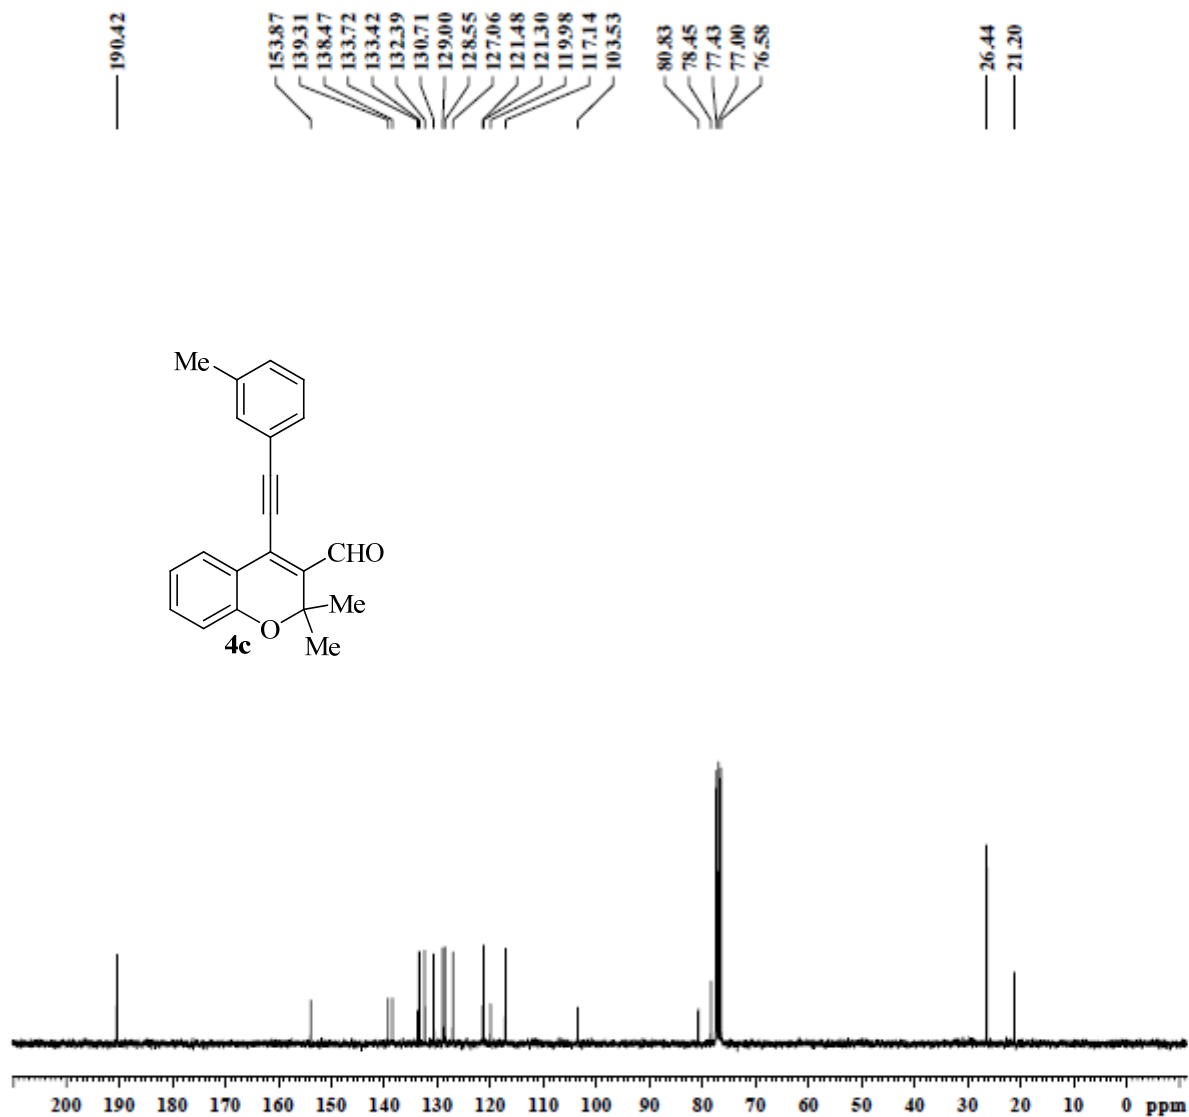

SKM-391  
13C, CDCl3

Current Data Parameters  
 NAME SKM-391,13C,200 MHz,28.6,12.M  
 EXPNO 360  
 PROCNO 1

F2 - Acquisition Parameters  
 Date\_ 20120629  
 Time 8.48  
 INSTRUM spect  
 PROBHD 5 mm QNP 1H/13  
 PULPROG zgpg30  
 TD 65536  
 SOLVENT CDCl3  
 NS 512  
 DS 4  
 SWH 18028.846 Hz  
 FIDRES 0.275095 Hz  
 AQ 1.8175818 sec  
 RG 14.2  
 DW 27.733 usec  
 DE 6.00 usec  
 TE 303.0 K  
 D1 2.0000000 sec  
 d11 0.0300000 sec  
 DELTA 1.8999998 sec  
 TDO 1

===== CHANNEL f1 =====  
 NUC1 13C  
 P1 8.70 usec  
 PL1 -3.00 dB  
 SFO1 75.4752953 MHz

===== CHANNEL f2 =====  
 CPDPRG2 waltz16  
 NUC2 1H  
 PCPD2 80.00 usec  
 PL2 -1.00 dB  
 PL12 17.00 dB  
 PL13 21.00 dB  
 SFO2 300.1312005 MHz

F2 - Processing parameters  
 SI 32768  
 SF 75.4677498 MHz  
 WDW EM  
 SSB 0  
 LB 1.00 Hz  
 GB 0  
 PC 1.40

Figure 8: <sup>13</sup>C -NMR Spectrum of **4c**.

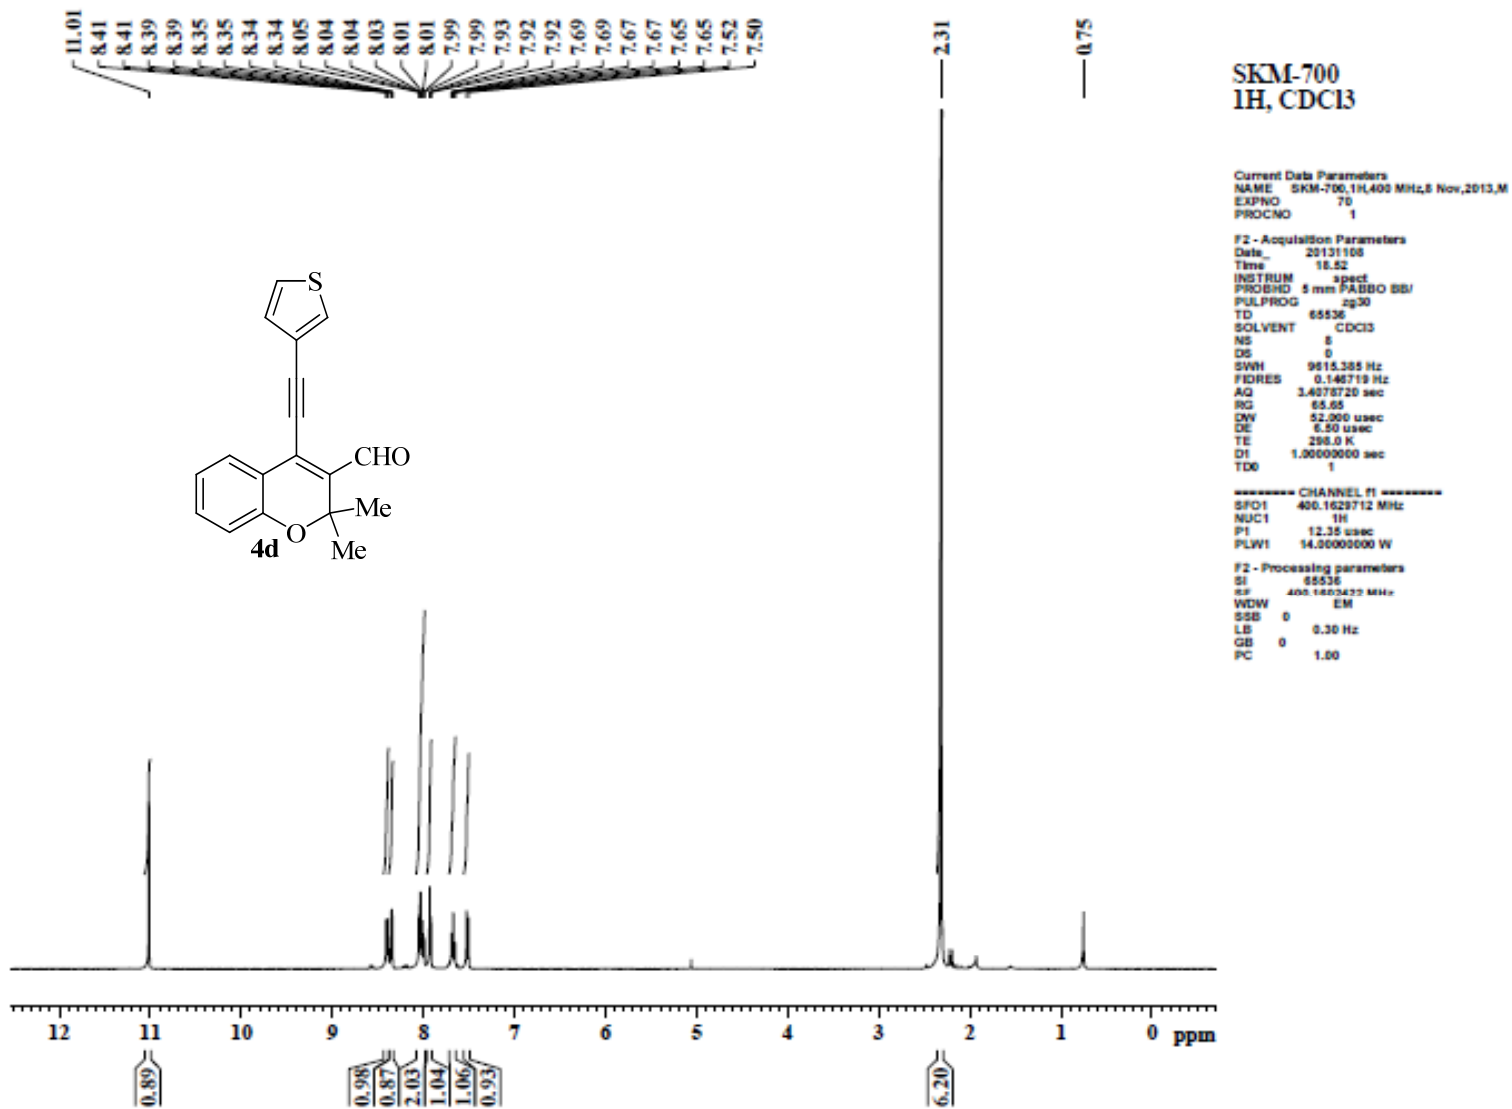

**Figure 9:** <sup>1</sup>H -NMR Spectrum of **4d**.

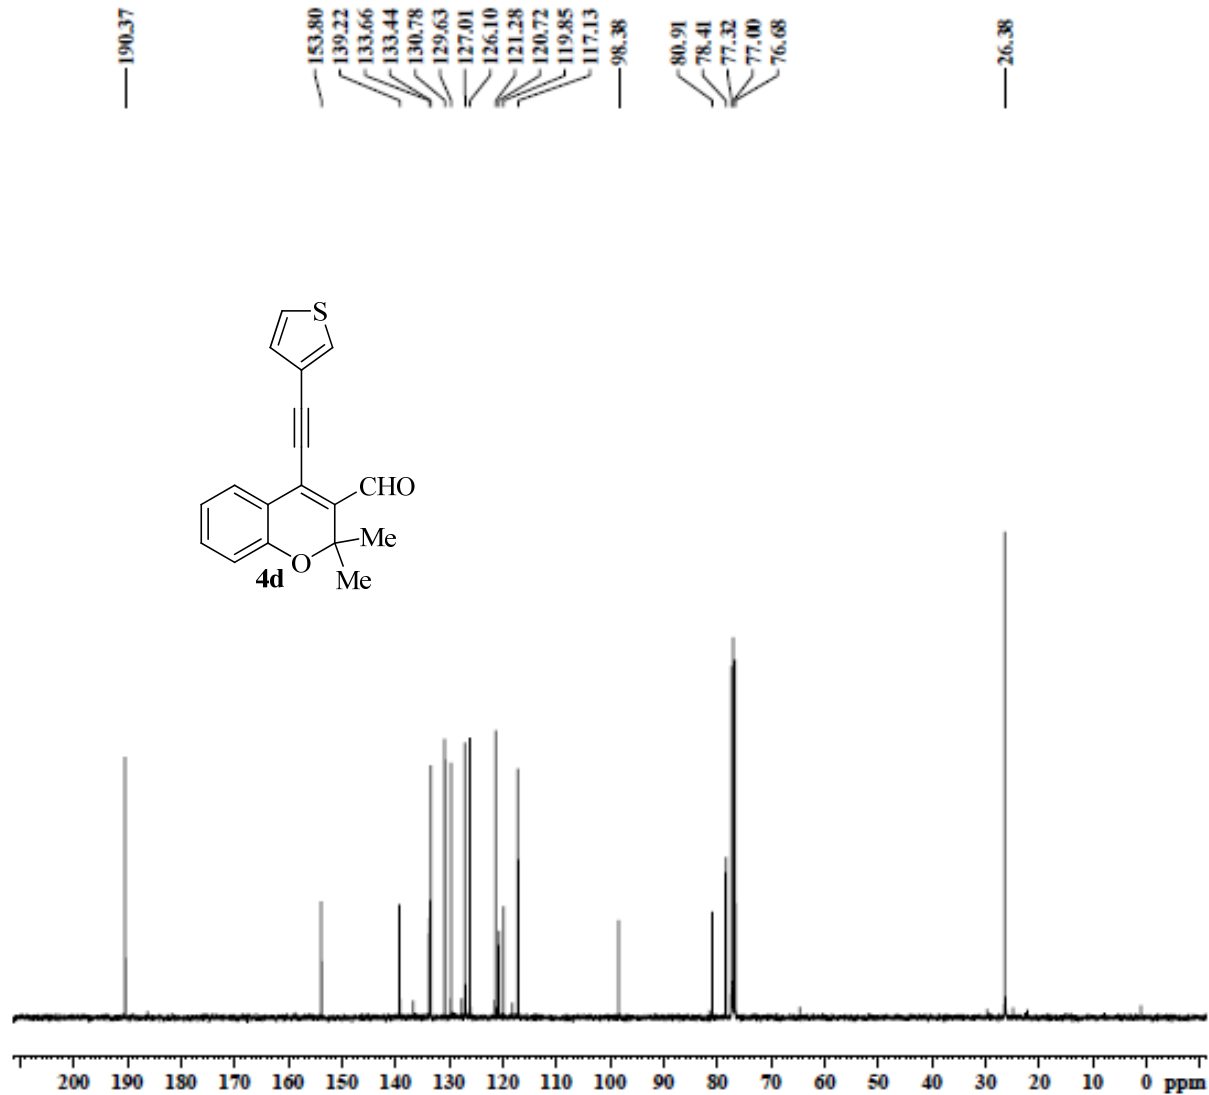

SKM-700  
13C, CDC13

Current Data Parameters  
NAME SKM-700\_13C\_400 MHz\_11 Nov\_2013\_E  
EXPNO 60  
PROCNO 1

F2 - Acquisition Parameters  
Date\_ 20131112  
Time 4.13  
INSTRUM spect  
PROBHD 5 mm PABBO BB/  
PULPROG zgpg30  
TD 65536  
SOLVENT CDC13  
NS 512  
DS 4  
SWH 24038.461 Hz  
FIDRES 0.386798 Hz  
AQ 1.3631488 sec  
RG 201.48  
DW 20.500 usec  
DE 6.50 usec  
TE 298.0 K  
D1 2.0000000 sec  
D11 0.0300000 sec  
TDO 1

----- CHANNEL f1 -----  
SFO1 100.6304993 MHz  
NUC1 13C  
P1 8.20 usec  
PLW1 70.59999847 W

----- CHANNEL f2 -----  
SFO2 400.1621006 MHz  
NUC2 1H  
CPOPRG2 waltz16  
PCPD2 90.00 usec  
PLW2 14.00000000 W  
PLW12 0.26381999 W  
PLW13 0.21353000 W

F2 - Processing parameters  
SI 32768  
SF 100.6304433 MHz  
WDW EM  
SSB 0  
LB 1.00 Hz  
GB 0  
PC 1.40

Figure 10: <sup>13</sup>C -NMR Spectrum of **4d**.



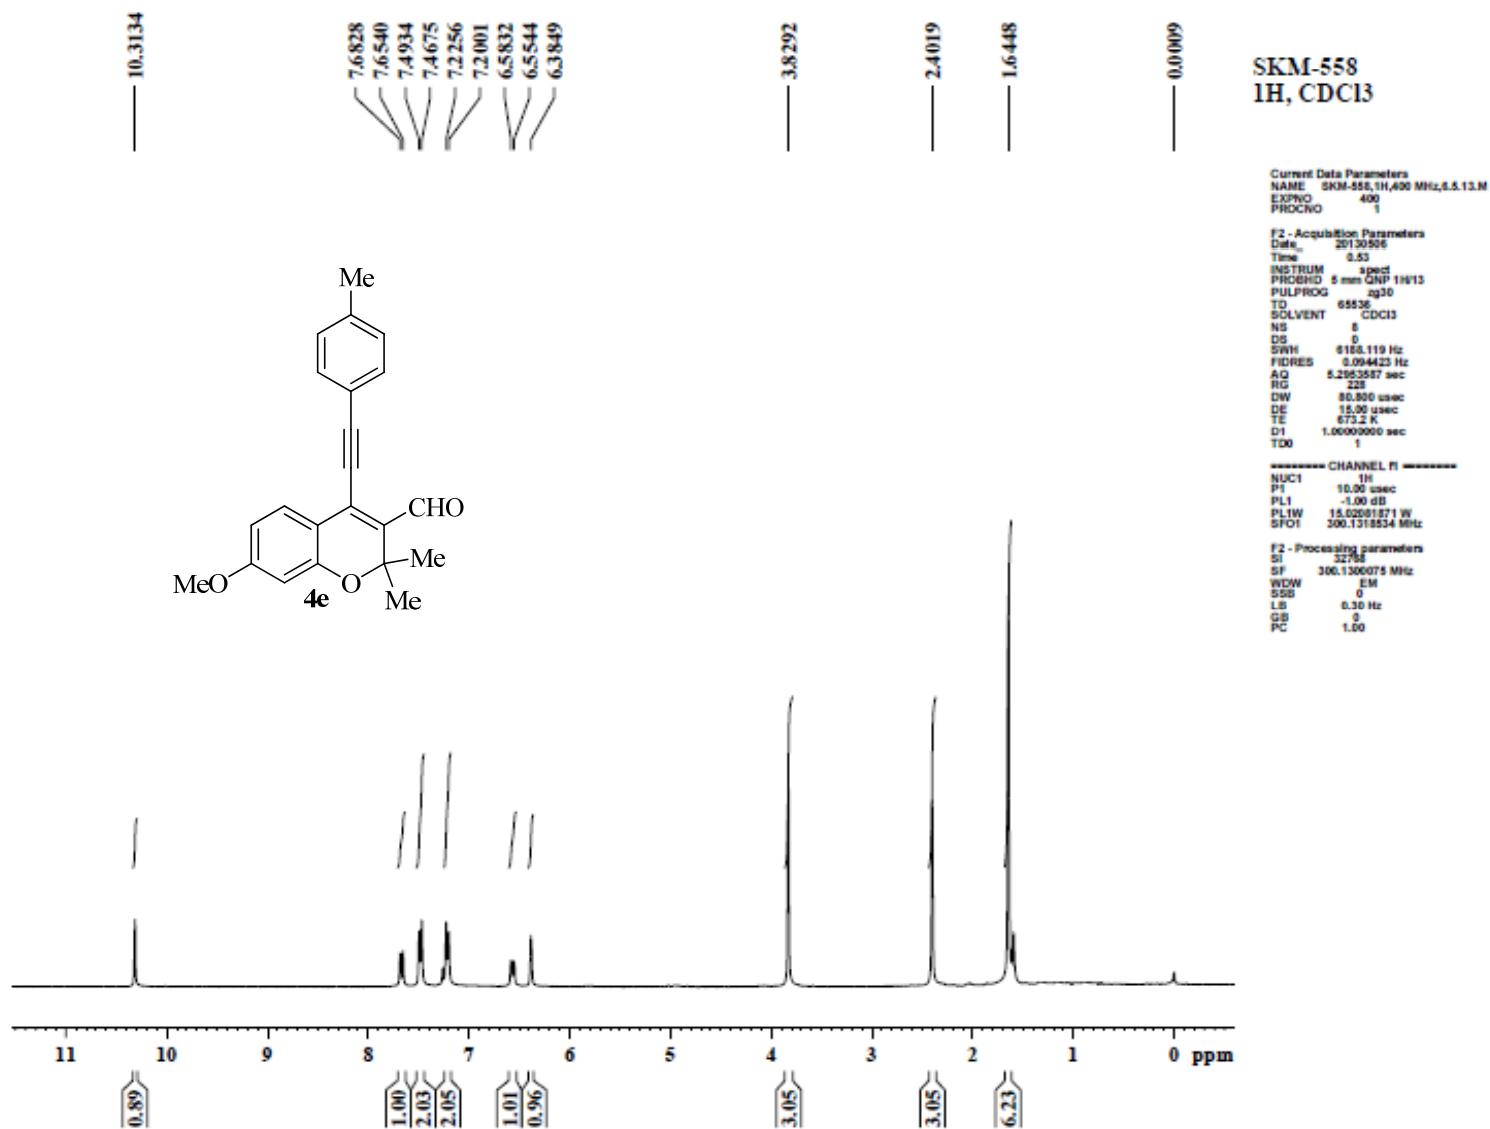

**Figure 11:** <sup>1</sup>H -NMR Spectrum of **4e**.

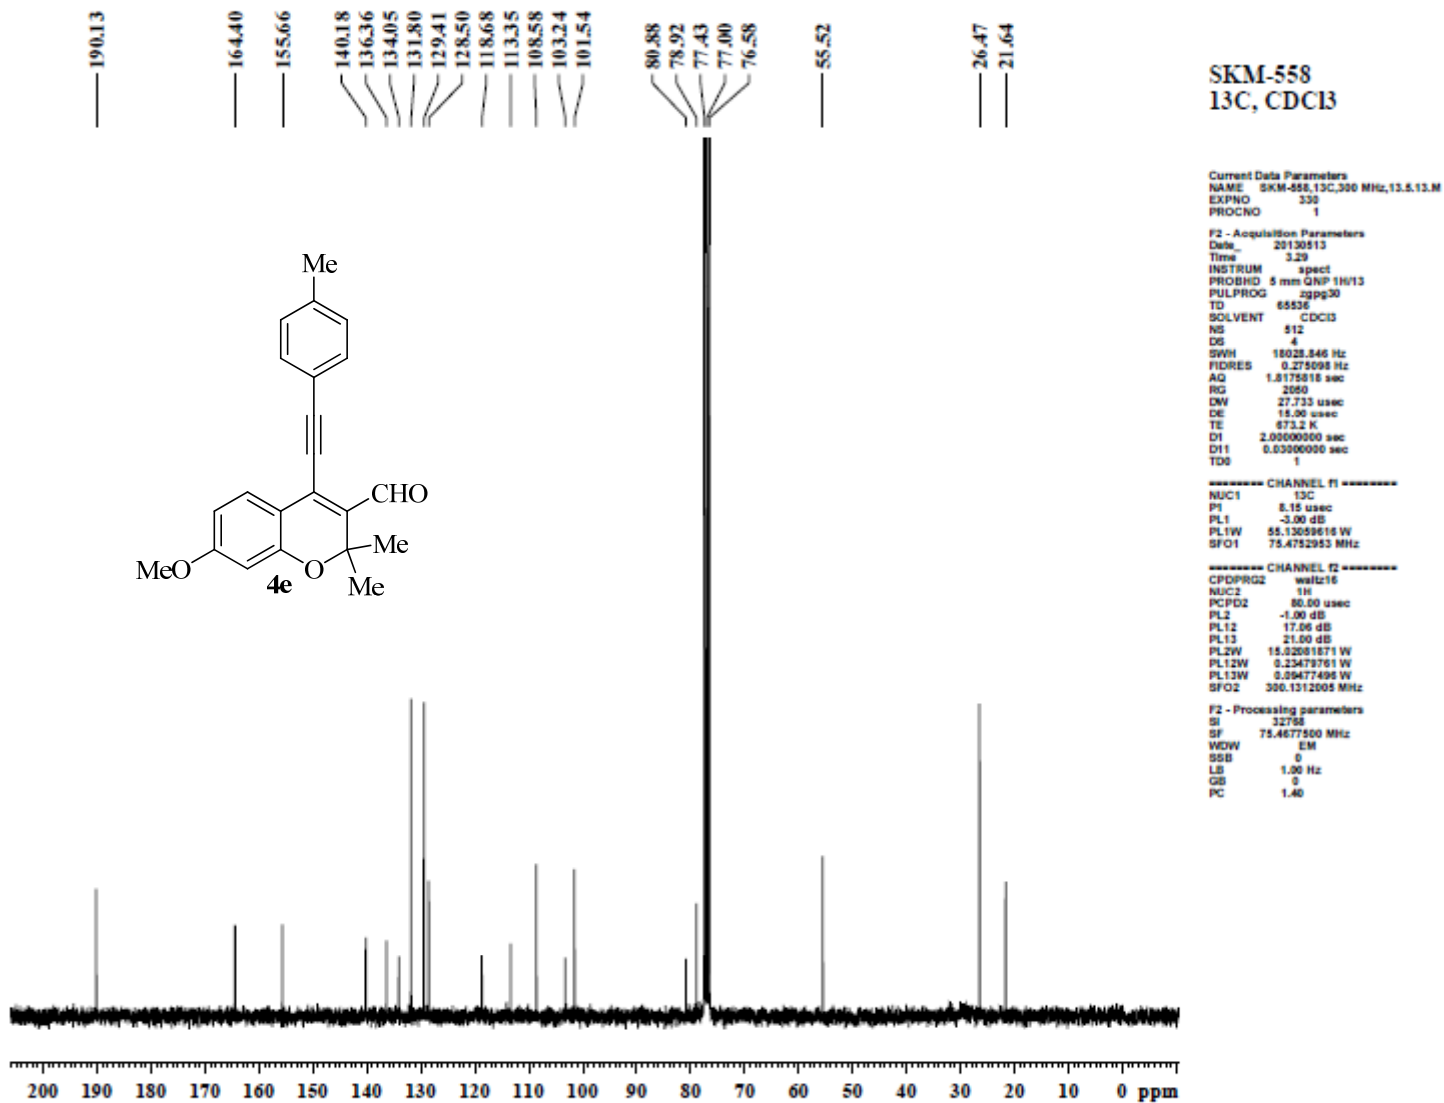

**Figure 12:**  $^{13}\text{C}$  -NMR Spectrum of **4e**.

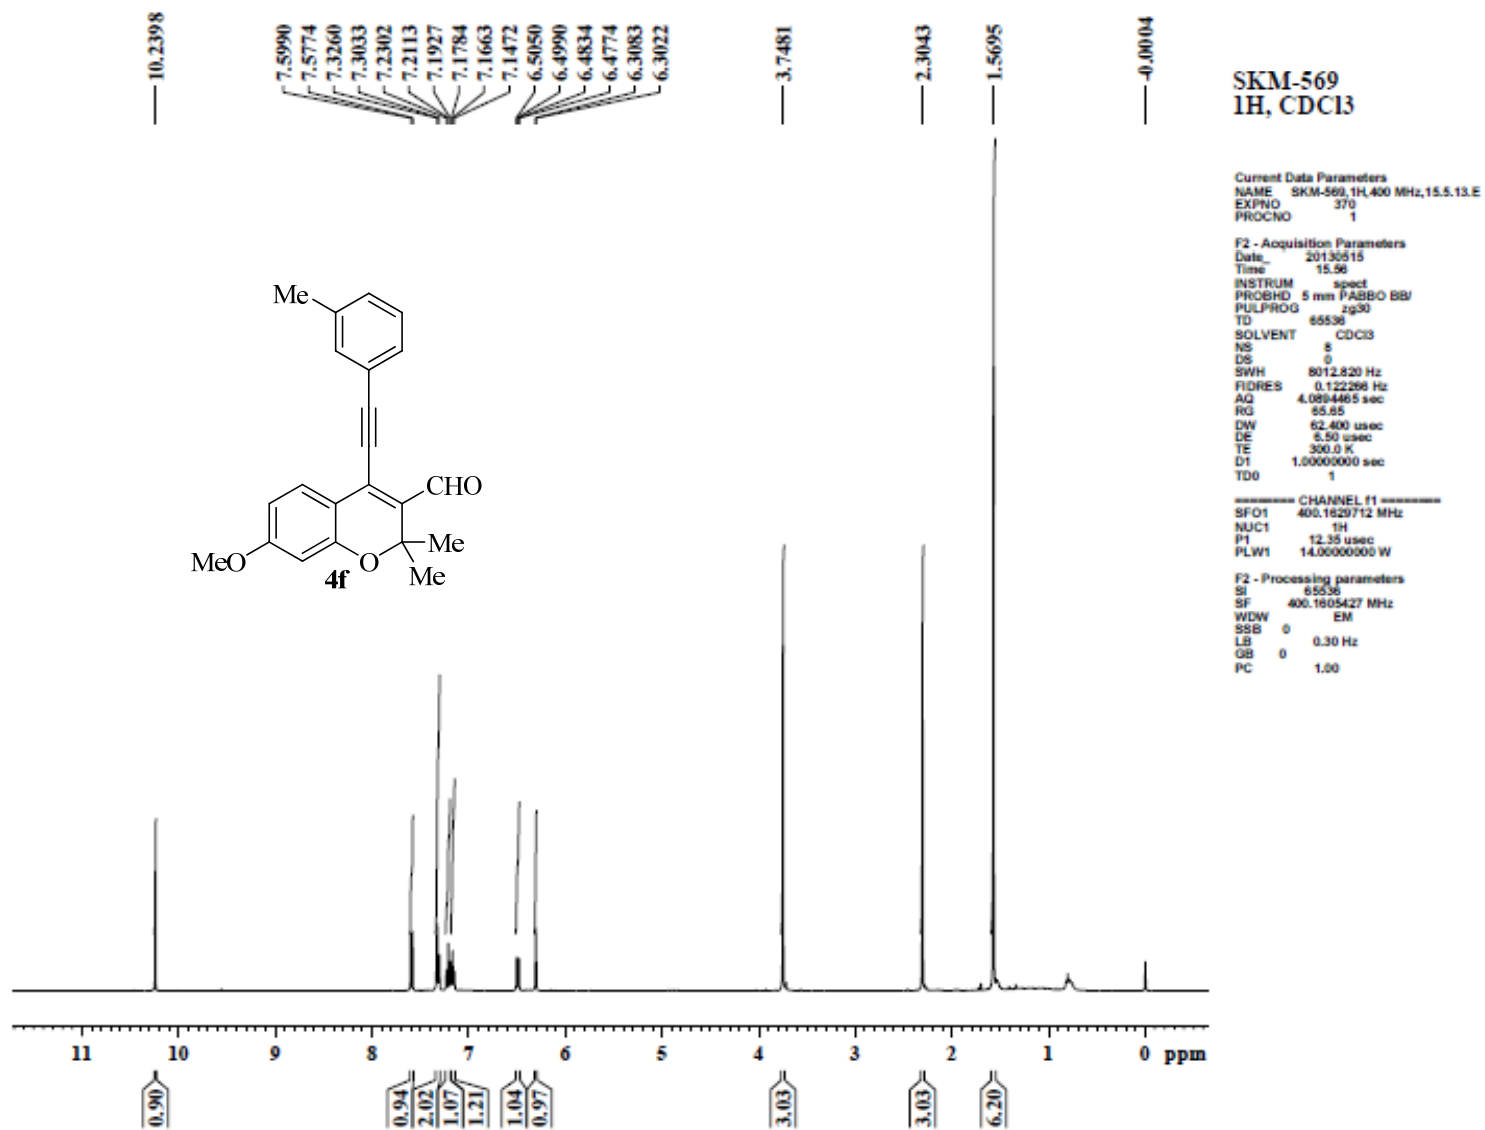

**Figure 13:** <sup>1</sup>H -NMR Spectrum of **4f**.

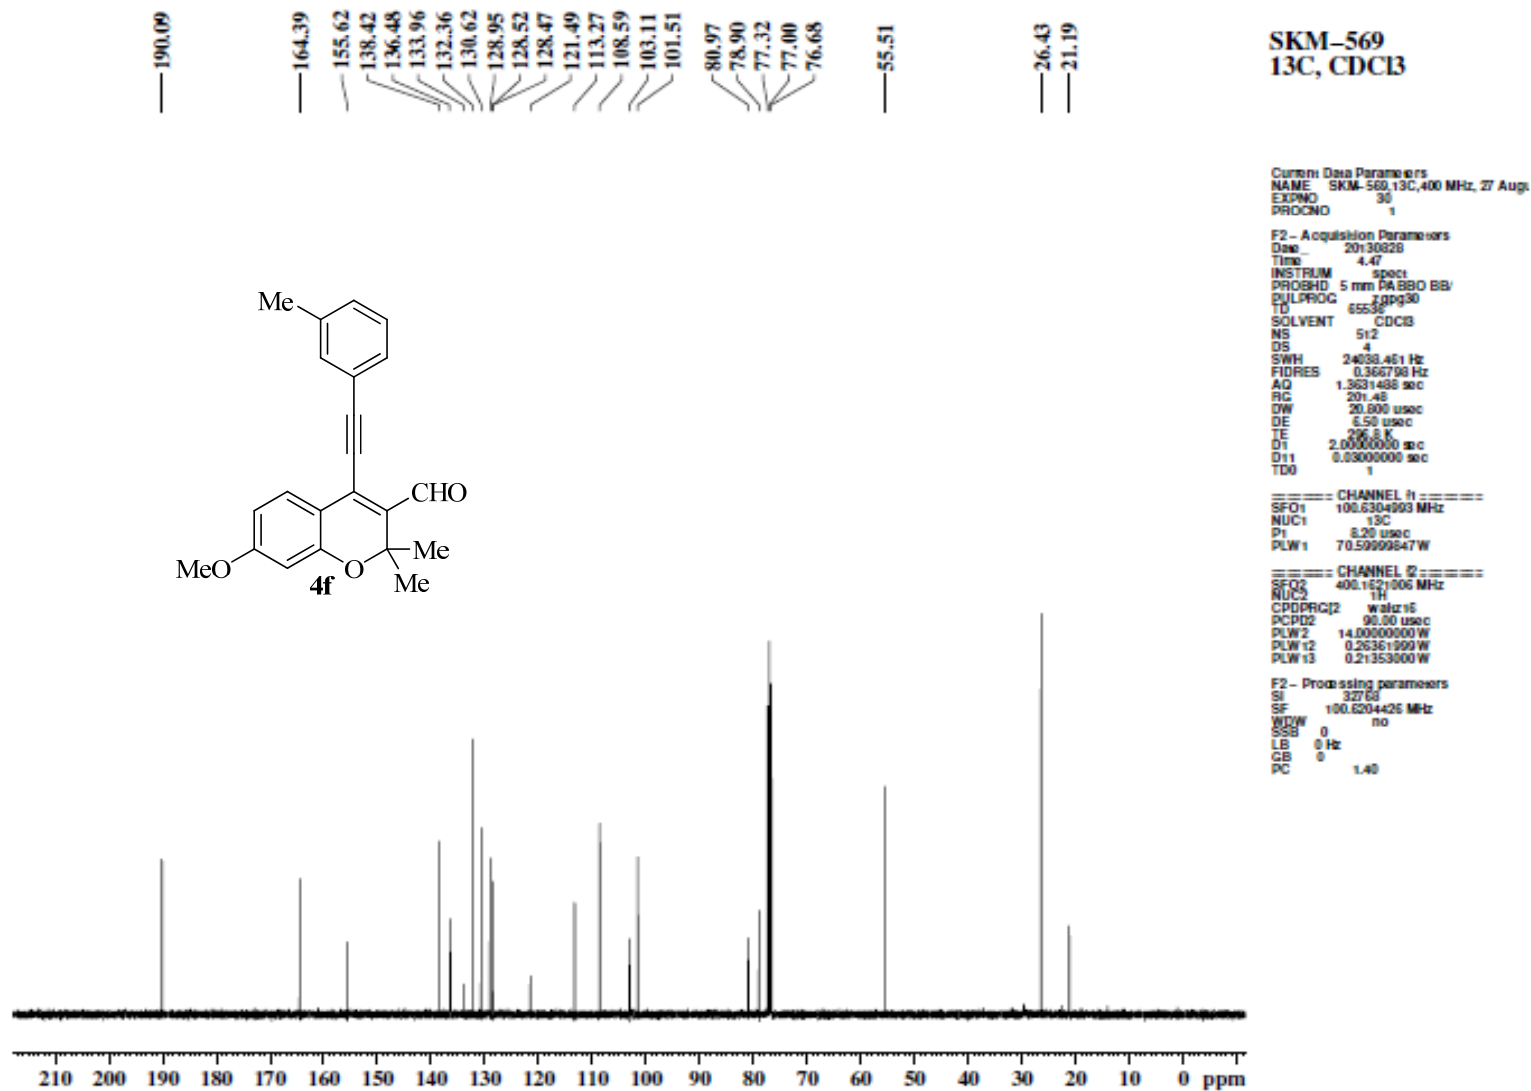

**Figure 14:** <sup>13</sup>C -NMR Spectrum of **4f**.

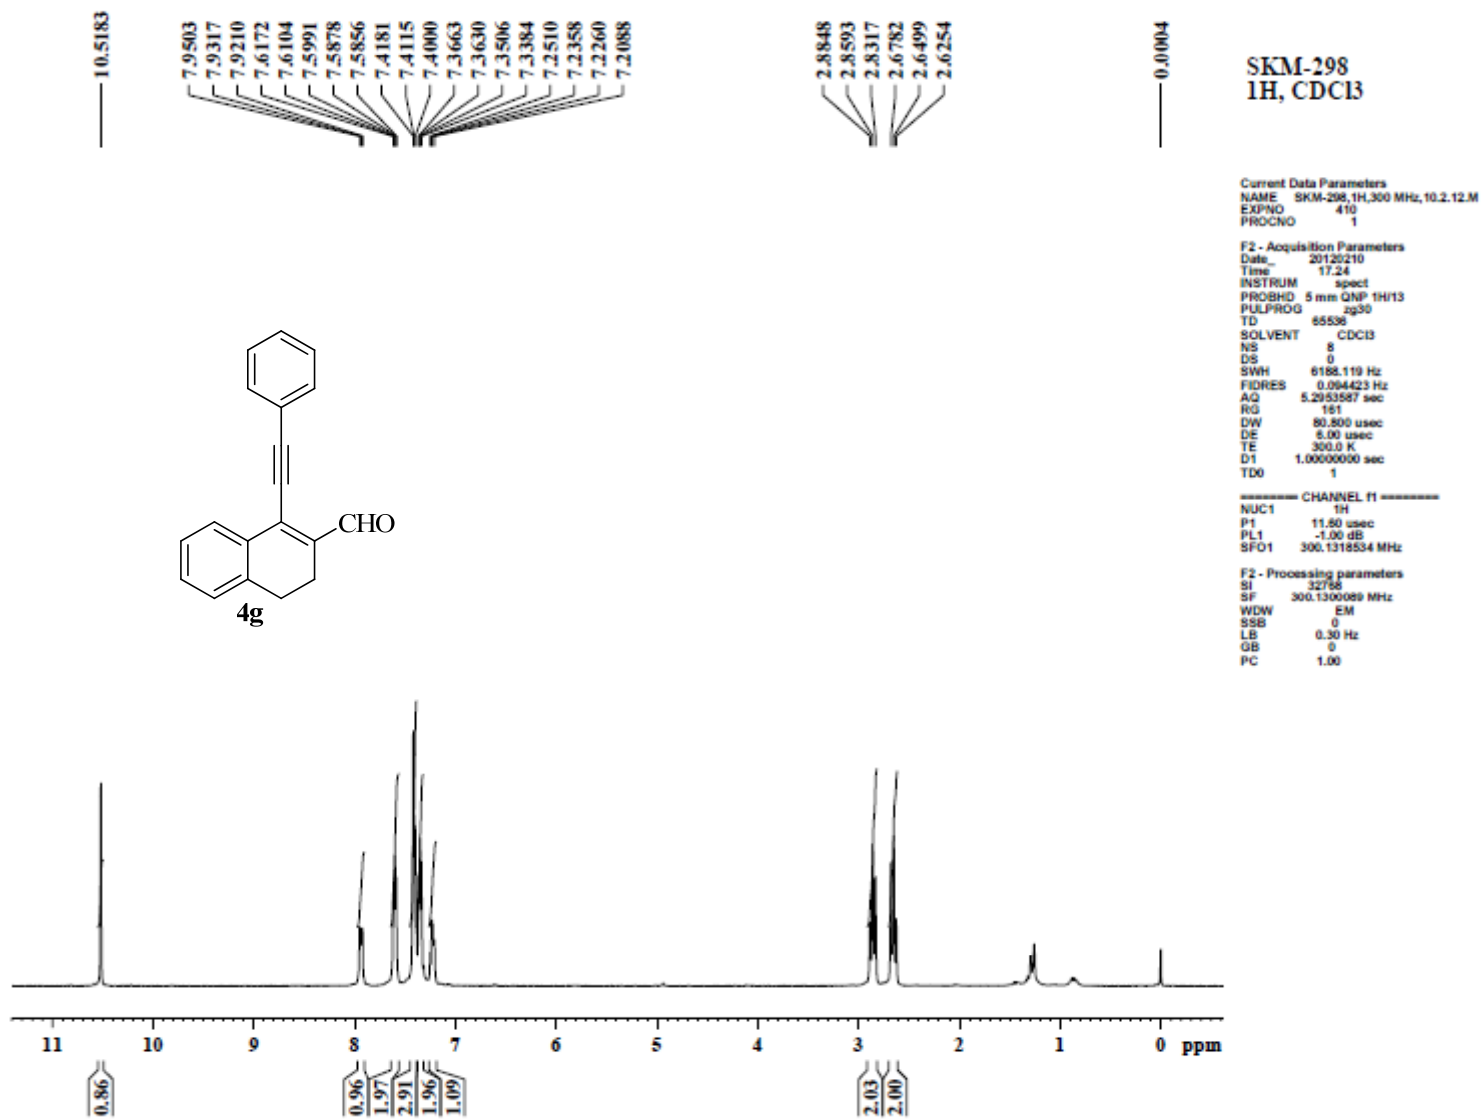

**Figure 15:** <sup>1</sup>H -NMR Spectrum of **4g**.

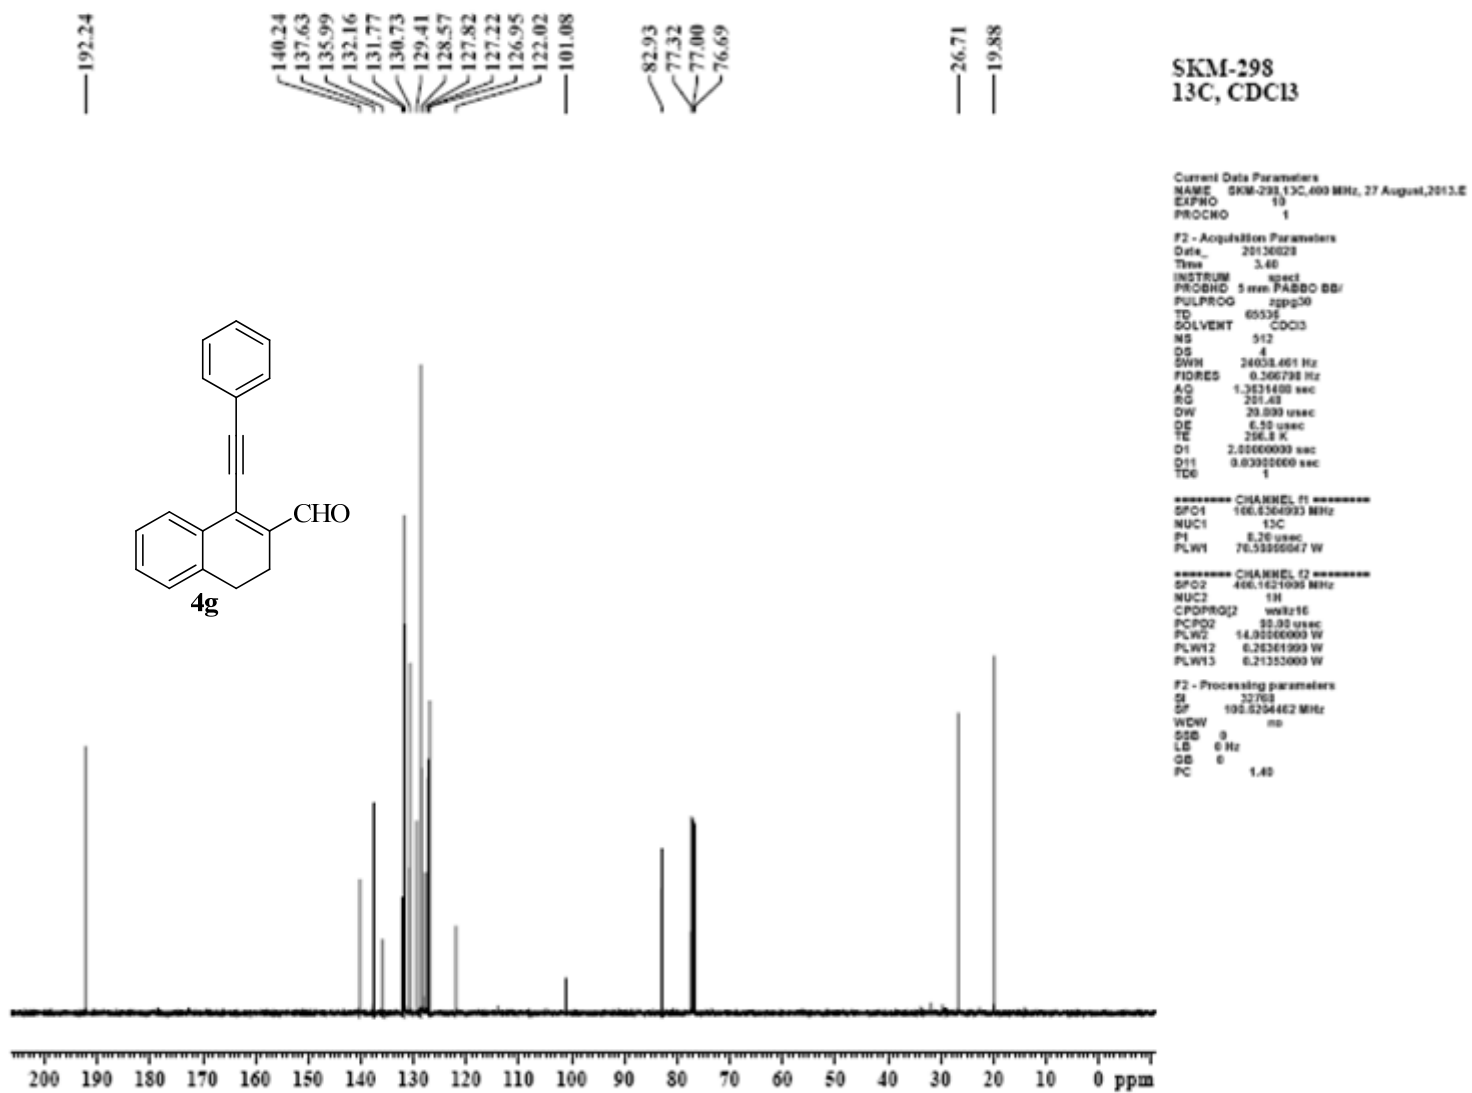

**Figure 16:**  $^{13}\text{C}$  -NMR Spectrum of **4g**.

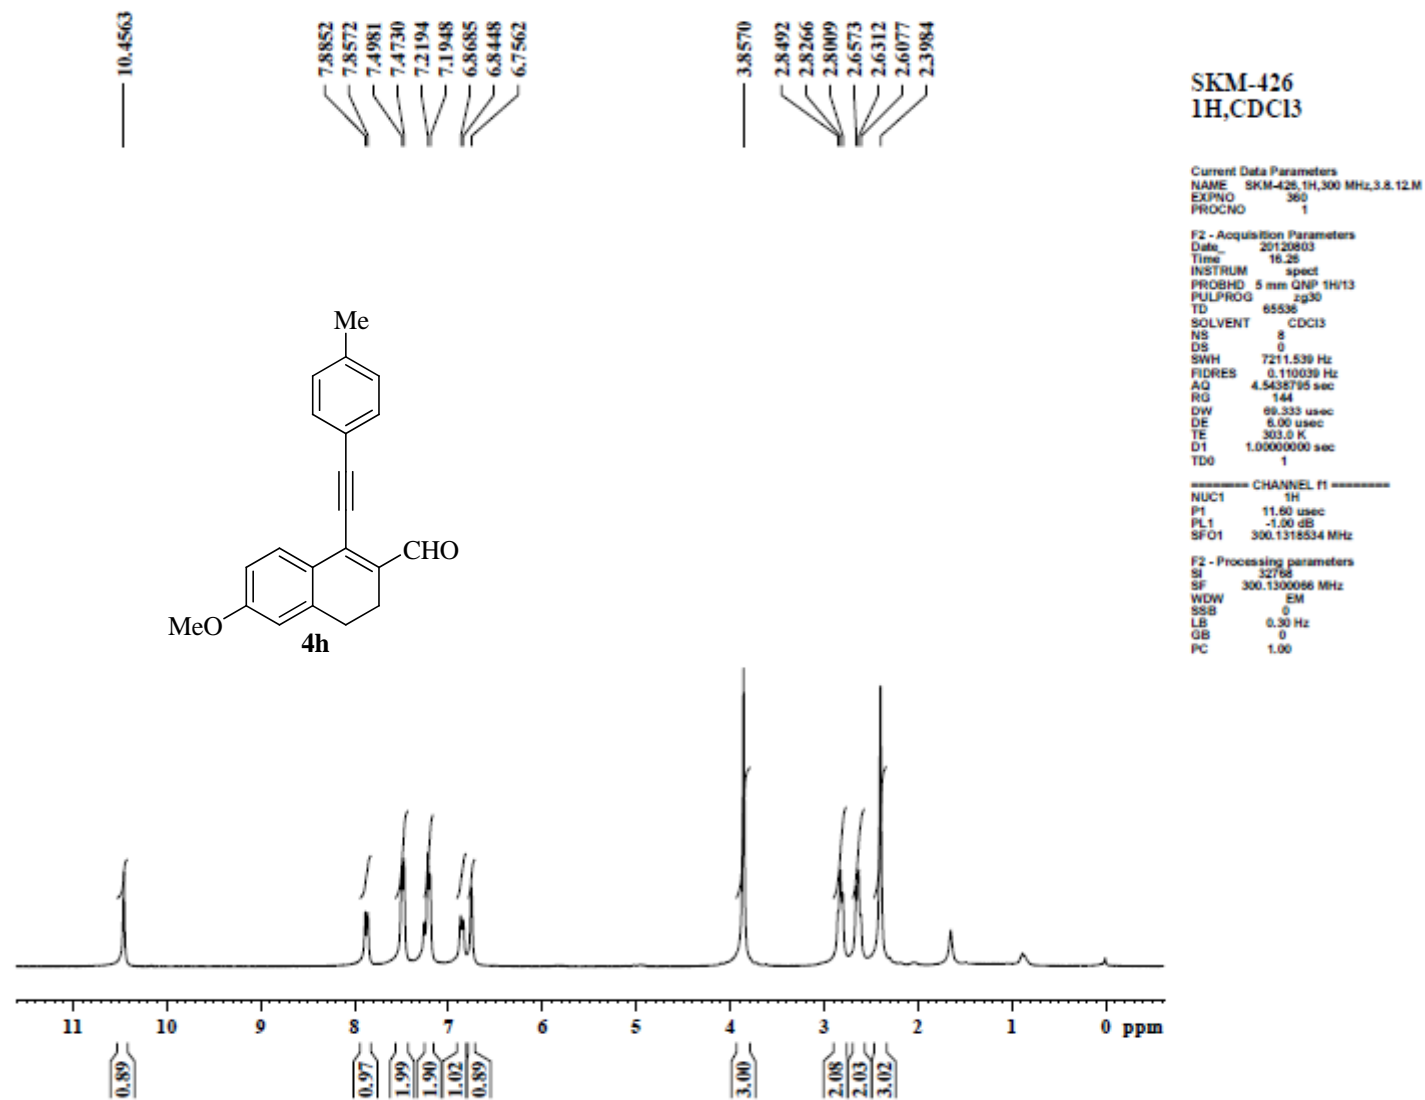

**Figure 17: <sup>1</sup>H -NMR Spectrum of 4h.**

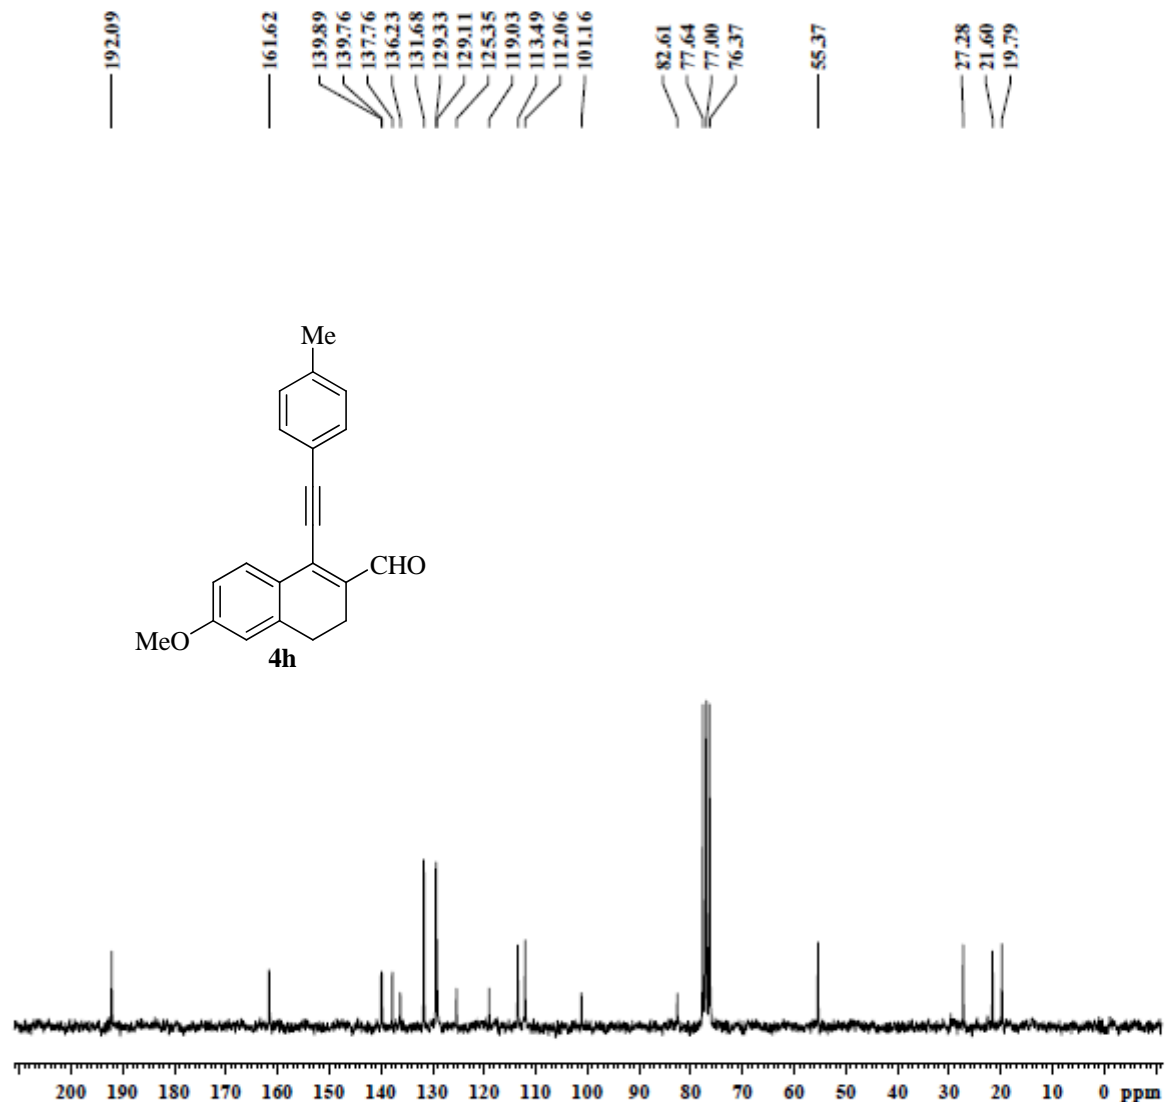

SKM-426  
13C, CDCl<sub>3</sub>

Current Data Parameters  
NAME SKM-426,13C,200 MHz,9.8.12.M  
EXPNO 400  
PROCNO 1

F2 - Acquisition Parameters  
Date\_ 20120809  
Time 10.36  
INSTRUM spect  
PROBHD 5 mm Dual 13C/  
PULPROG zgpg30  
TD 65536  
SOLVENT CDCl<sub>3</sub>  
NS 256  
DS 4  
SWH 11990.407 Hz  
FIDRES 0.182959 Hz  
AQ 2.7329011 sec  
RG 50.8  
DWF 41.700 usec  
DE 0.00 usec  
TE 0.0 K  
D1 2.00000000 sec  
d11 0.03000000 sec  
DELTA 1.80000000 sec  
MCREST 0.00000000 sec  
MCWRK 0.01500000 sec

----- CHANNEL f1 -----  
NUC1 13C  
P1 6.30 usec  
PL1 -6.00 dB  
SFO1 50.3277868 MHz

----- CHANNEL f2 -----  
CPDPRG2 waltz16  
NUC2 1H  
PCPD2 100.00 usec  
PL2 -4.00 dB  
PL12 18.00 dB  
PL13 22.00 dB  
SFO2 200.1308005 MHz

F2 - Processing parameters  
SI 32768  
SF 50.3227315 MHz  
WDW EM  
SSB 0  
LB 3.00 Hz  
GB 0  
PC 1.40

Figure 18: <sup>13</sup>C -NMR Spectrum of **4h**.



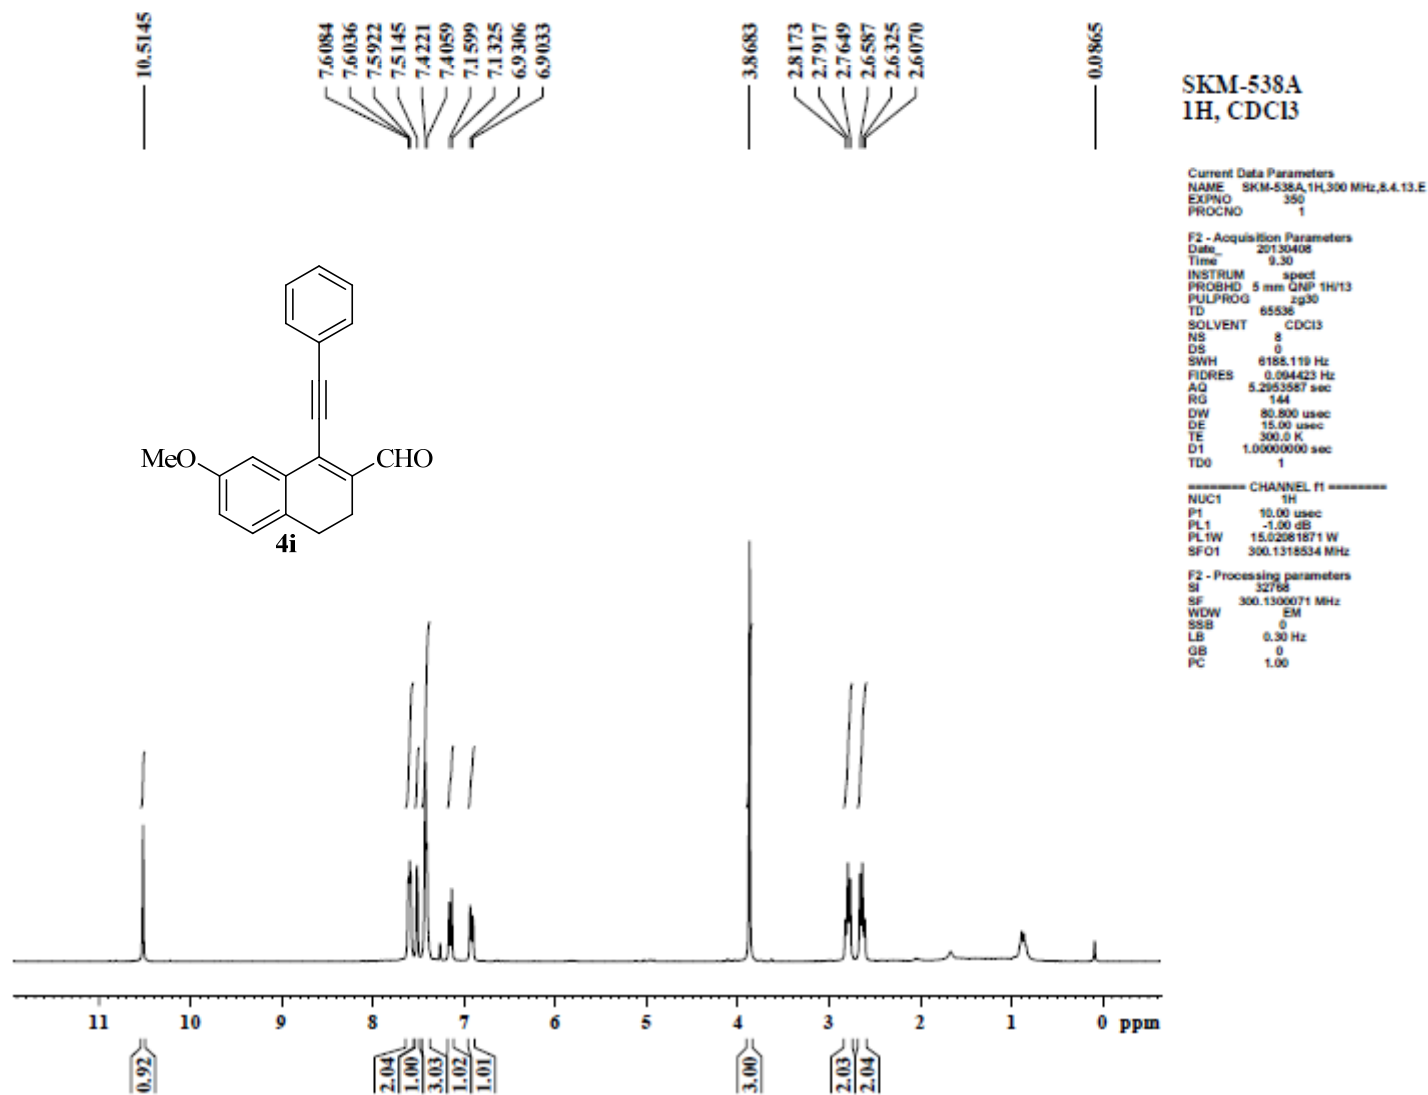

**Figure 19:**  $^1\text{H}$  -NMR Spectrum of **4i**.

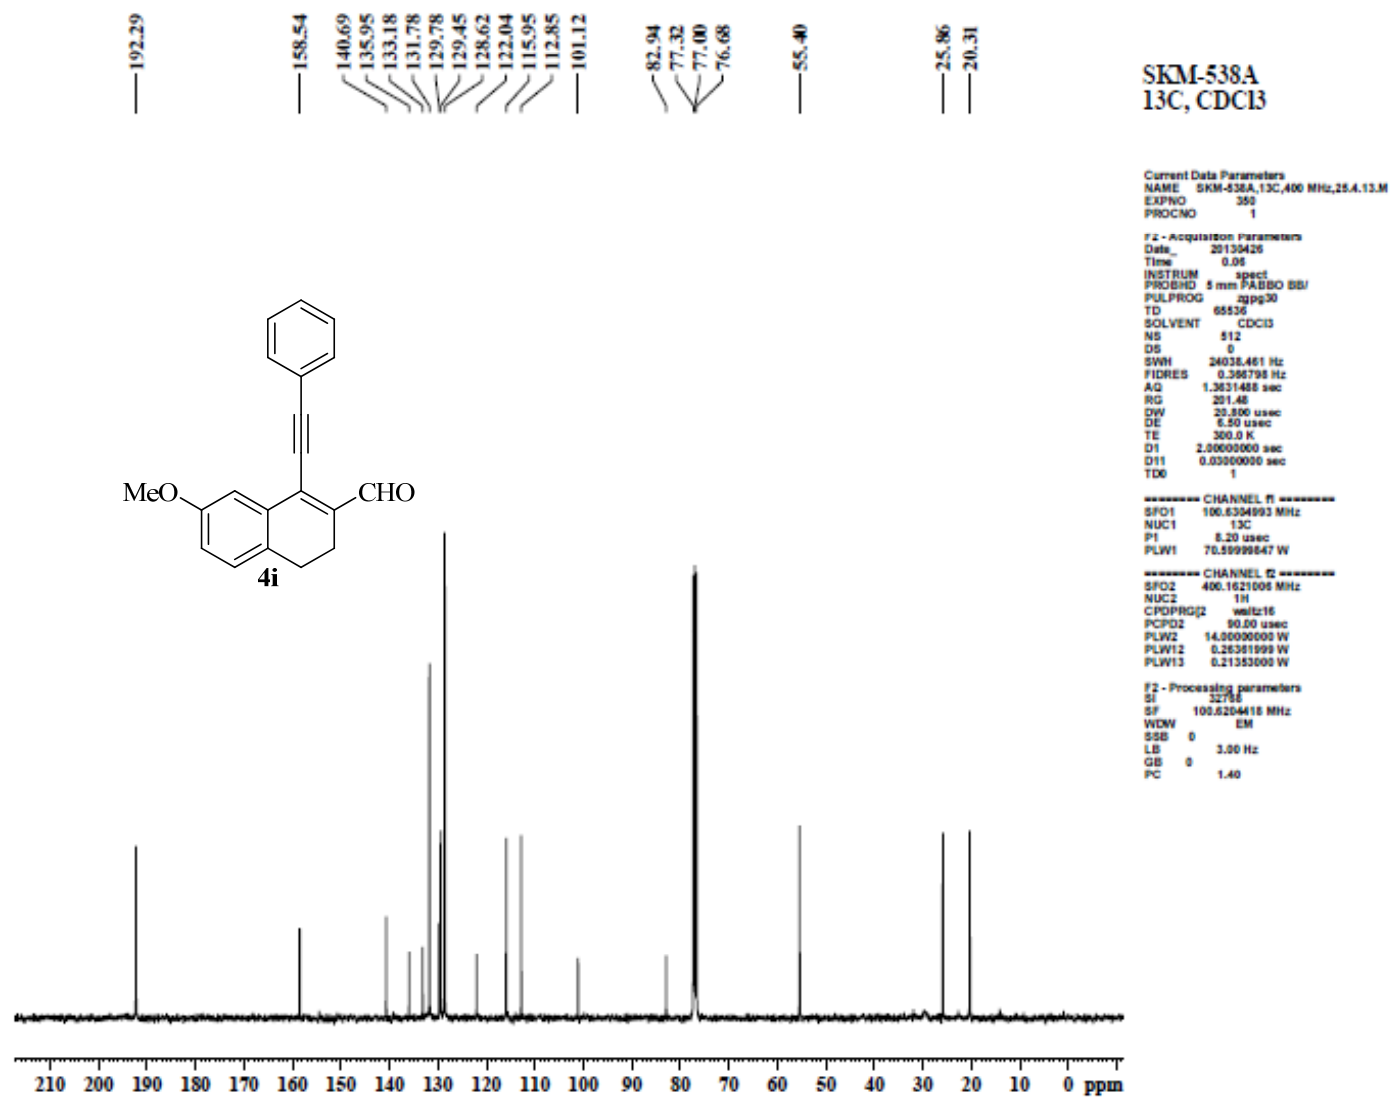

**Figure 20:**  $^{13}\text{C}$  -NMR Spectrum of **4i**.

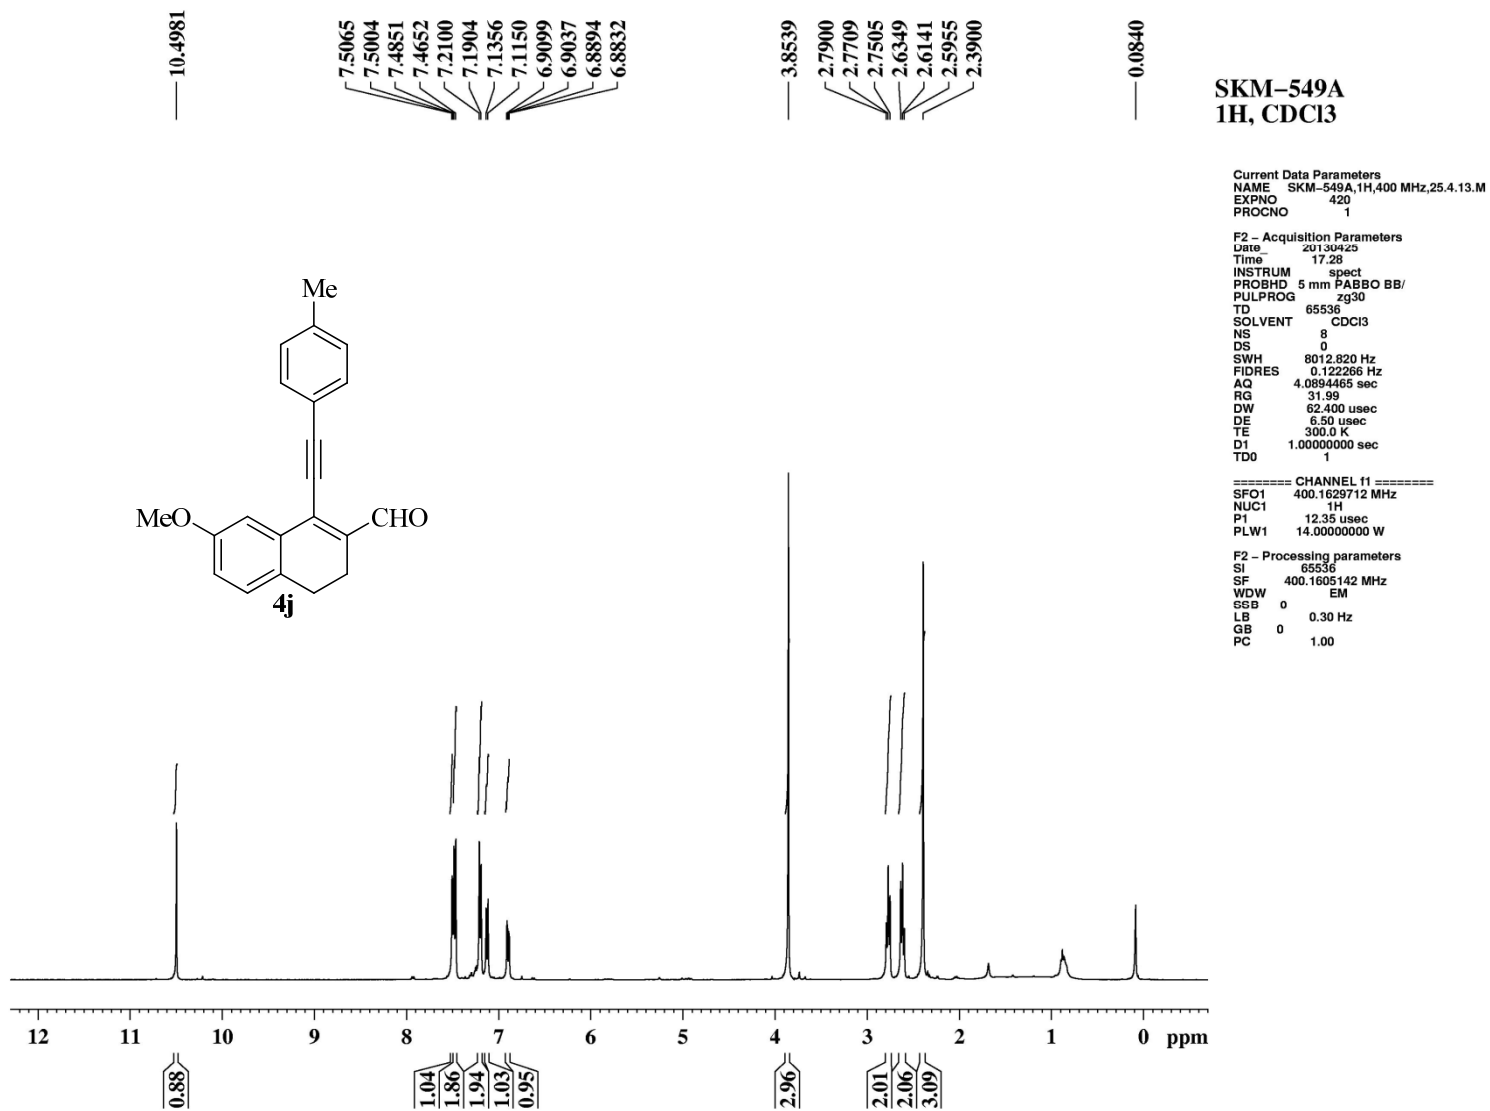

**Figure 21:** <sup>1</sup>H -NMR Spectrum of **4j**.

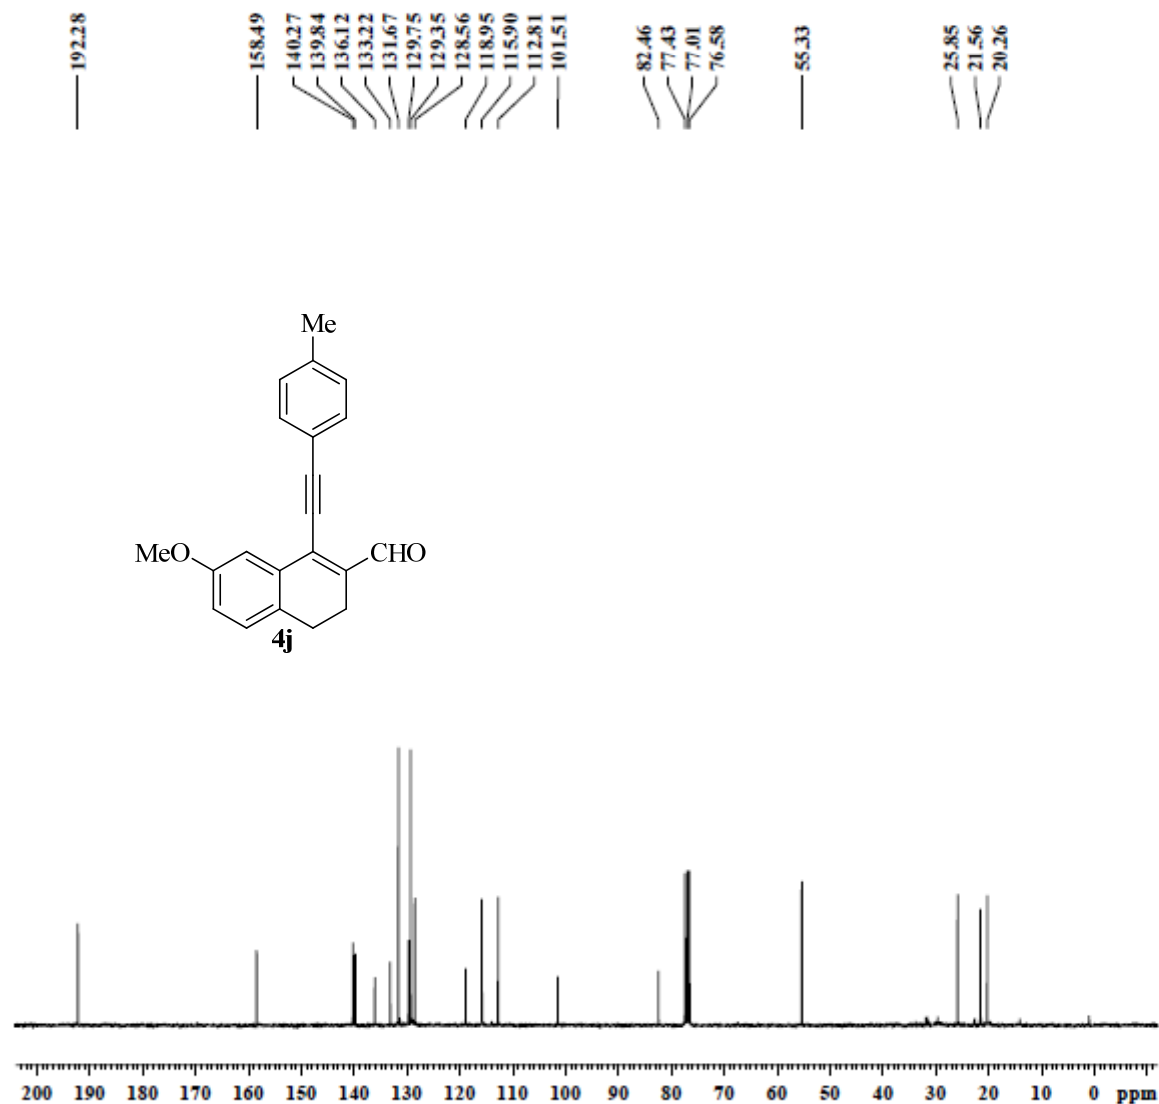

SKM-549A  
13C, CDCl3

Current Data Parameters  
NAME SKM-549A,13C,300 MHz,6.5,13.M  
EXPNO 360  
PROCNO 1

F2 - Acquisition Parameters  
Date\_ 20130506  
Time 8.51  
INSTRUM spect  
PROBHD 5 mm QNP 1H/13  
PULPROG zgpg30  
TD 65536  
SOLVENT CDCl3  
NS 512  
DS 4  
SWH 18028.846 Hz  
FIDRES 0.275098 Hz  
AQ 1.8175818 sec  
RG 2030  
DW 27.733 usec  
DE 15.00 usec  
TE 673.2 K  
D1 2.0000000 sec  
D11 0.0300000 sec  
TD0 1

===== CHANNEL f1 =====  
NUC1 13C  
P1 8.15 usec  
PL1 -3.00 dB  
PL1W 55.13059616 W  
SFO1 75.4752953 MHz

===== CHANNEL f2 =====  
CPDPRG2 waltz16  
NUC2 1H  
PCPD2 60.00 usec  
PL2 -1.00 dB  
PL12 17.06 dB  
PL13 21.00 dB  
PL2W 15.02081871 W  
PL12W 0.23437971 W  
PL13W 0.0947406 W  
SFO2 300.1312005 MHz

F2 - Processing parameters  
SI 32768  
SF 75.4677548 MHz  
WDW EM  
SSB 0  
LB 1.00 Hz  
GB 0  
PC 1.40

Figure 22: <sup>13</sup>C -NMR Spectrum of **4j**.

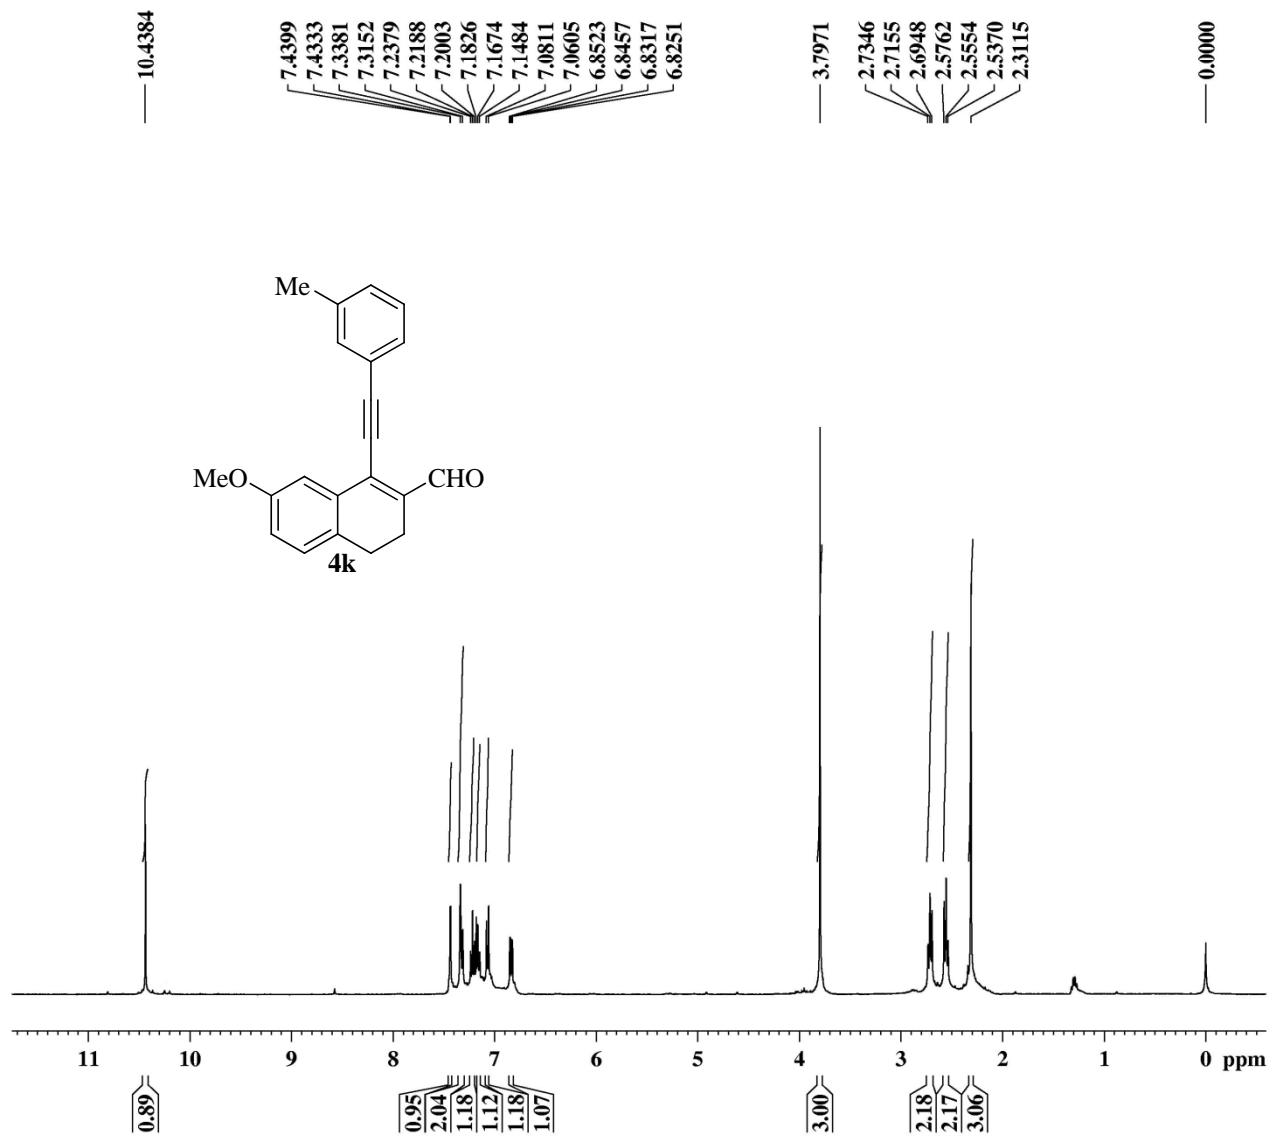

**SKM-556A  
1H, CDCl3**

Current Data Parameters  
 NAME SKM-556A,1H,400 MHz,29.4.1:  
 EXPNO 390  
 PROCNO 1

F2 - Acquisition Parameters  
 Date\_ 20130430  
 Time 13.29  
 INSTRUM spect  
 PROBHD 5 mm PABBO BB/  
 PULPROG zg30  
 TD 65536  
 SOLVENT CDCl3  
 NS 8  
 DS 0  
 SWH 8012.820 Hz  
 FIDRES 0.122266 Hz  
 AQ 4.0894465 sec  
 RG 58.68  
 DW 62.400 usec  
 DE 6.50 usec  
 TE 295.7 K  
 D1 1.00000000 sec  
 TDO 1

===== CHANNEL f1 =====  
 SFO1 400.1629712 MHz  
 NUC1 1H  
 P1 12.35 usec  
 PLW1 14.00000000 W

F2 - Processing parameters  
 SI 65536  
 SF 400.1605410 MHz  
 WDW EM  
 SSB 0  
 LB 0.30 Hz  
 GB 0  
 PC 1.00

**Figure 23: <sup>1</sup>H -NMR Spectrum of 4k.**

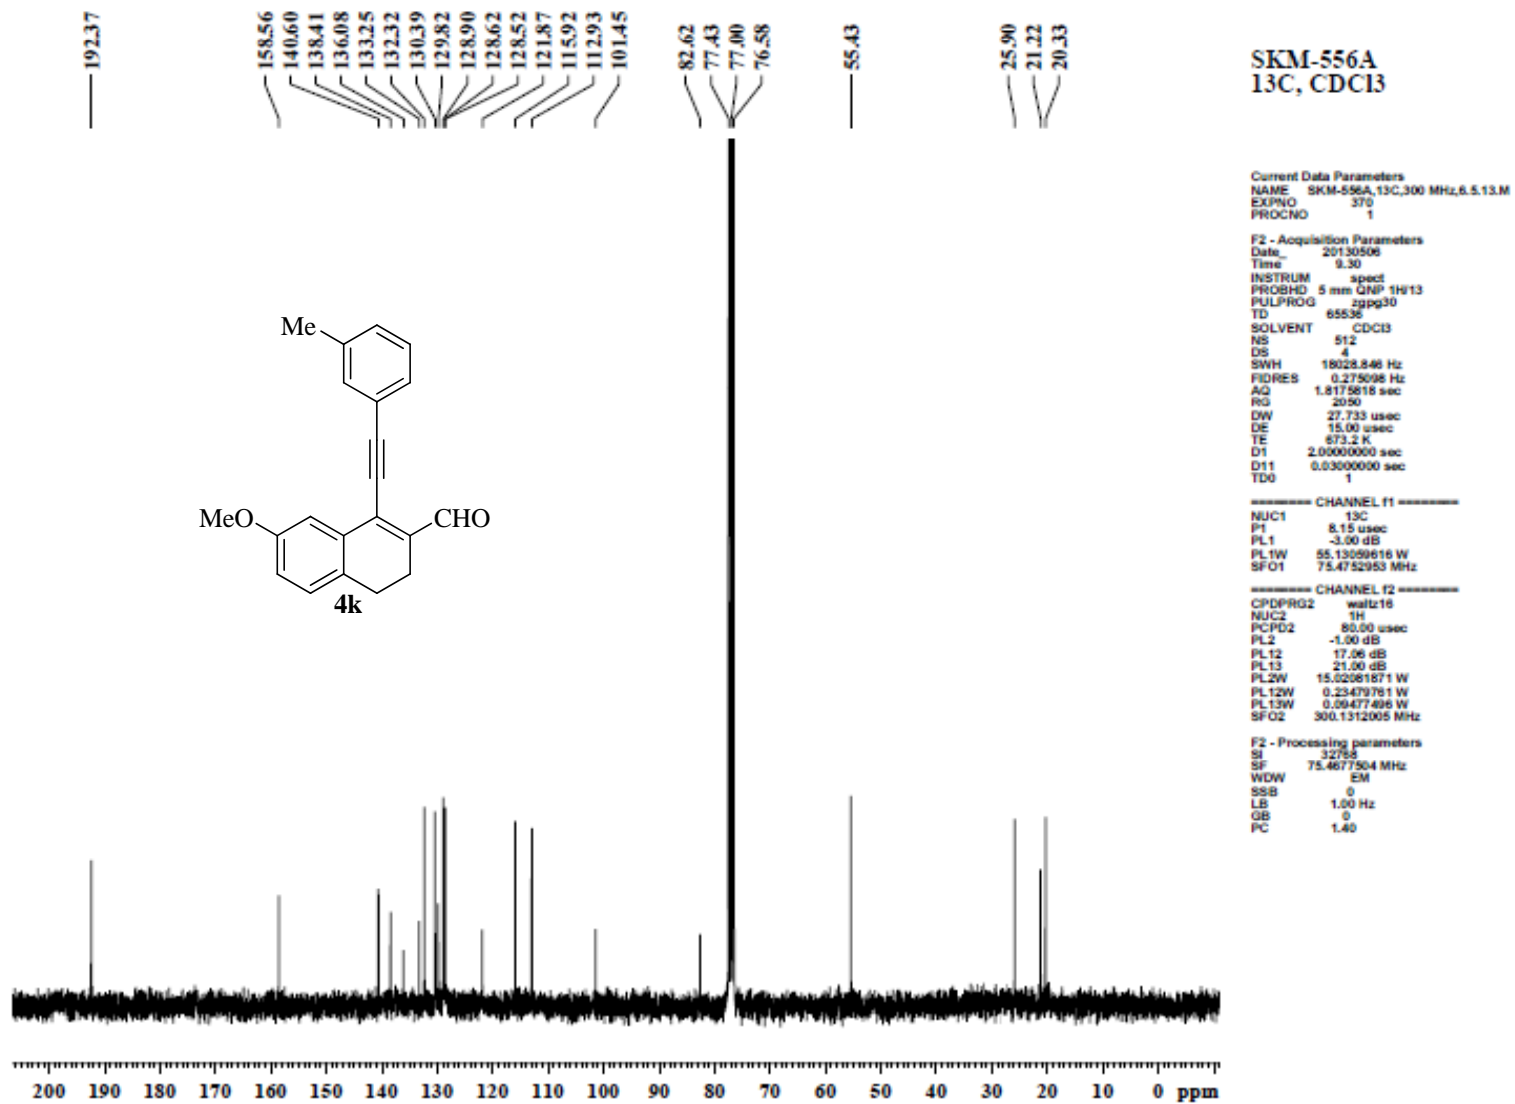

**Figure 24:**  $^{13}\text{C}$  -NMR Spectrum of **4k**.

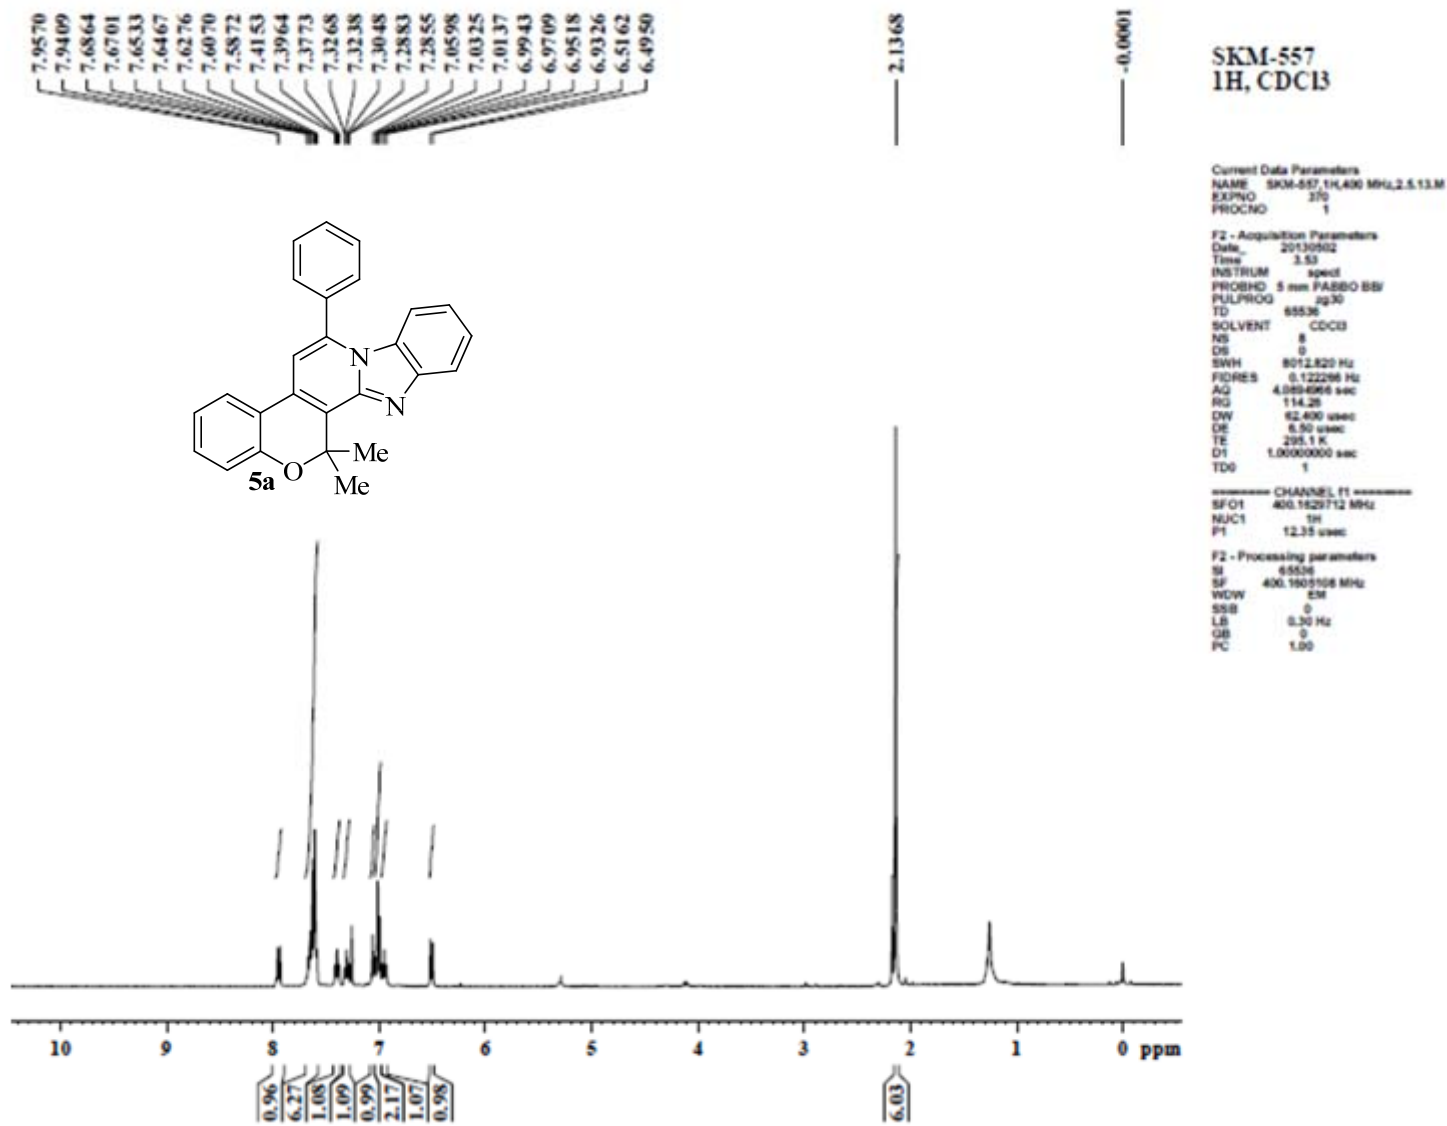

**Figure 25:**  $^1\text{H}$ -NMR Spectrum of **5a**.

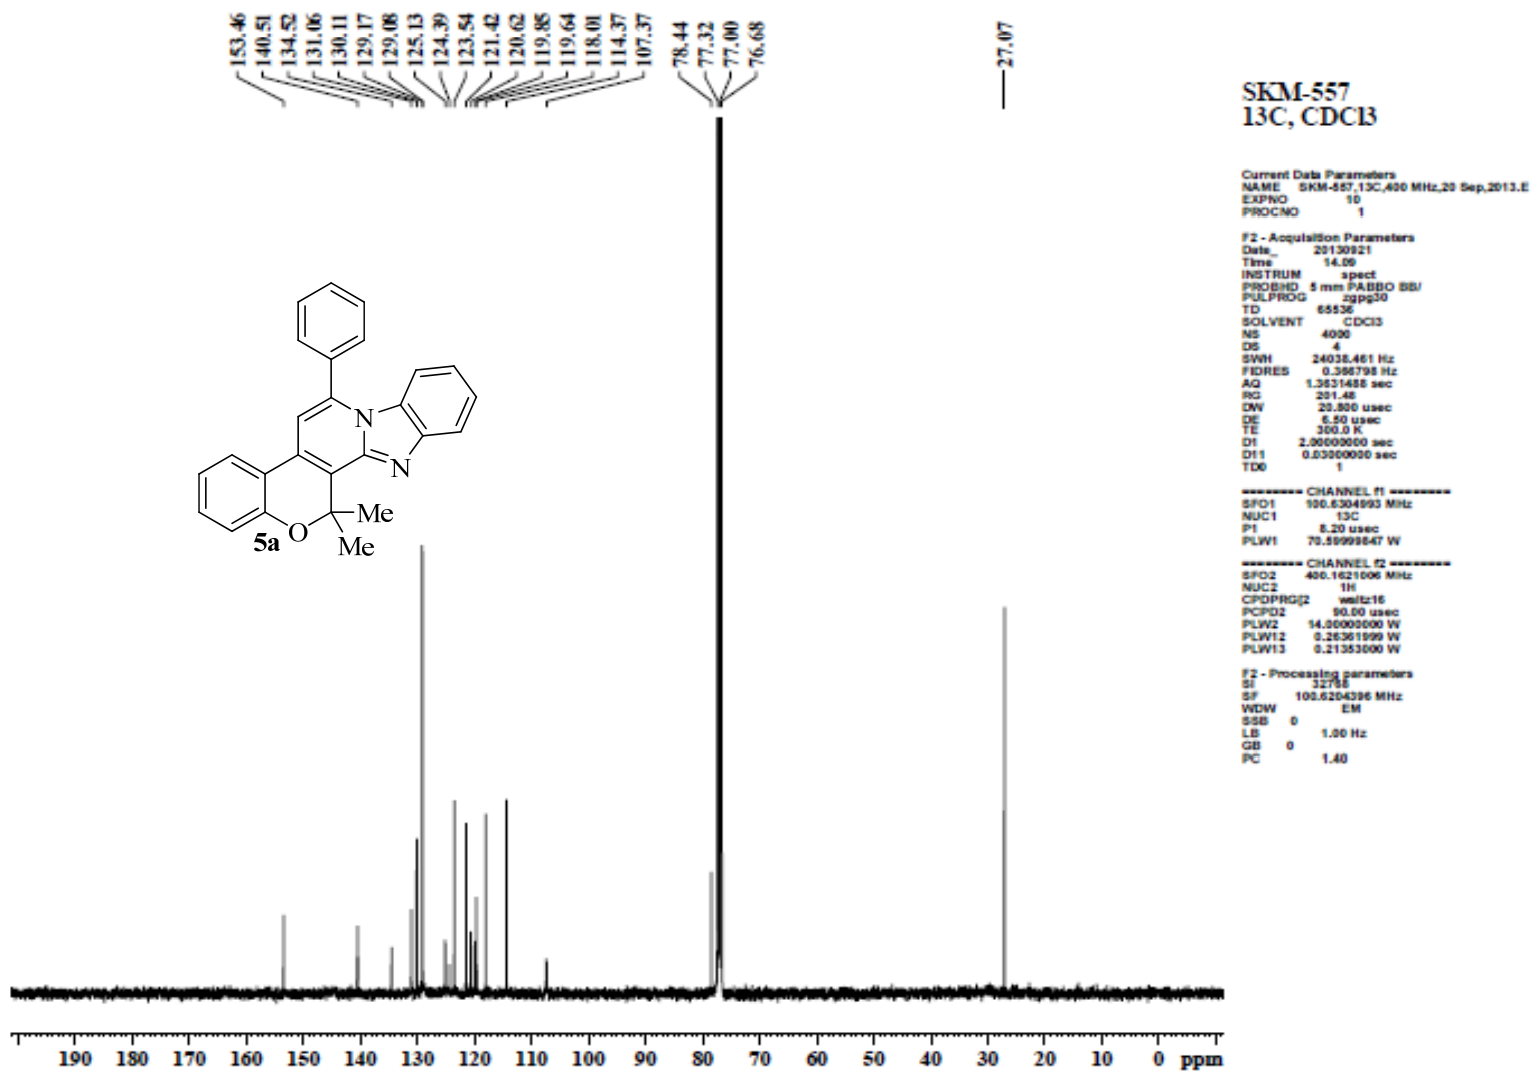

**Figure 26:**  $^{13}\text{C}$  -NMR Spectrum of **5a**.



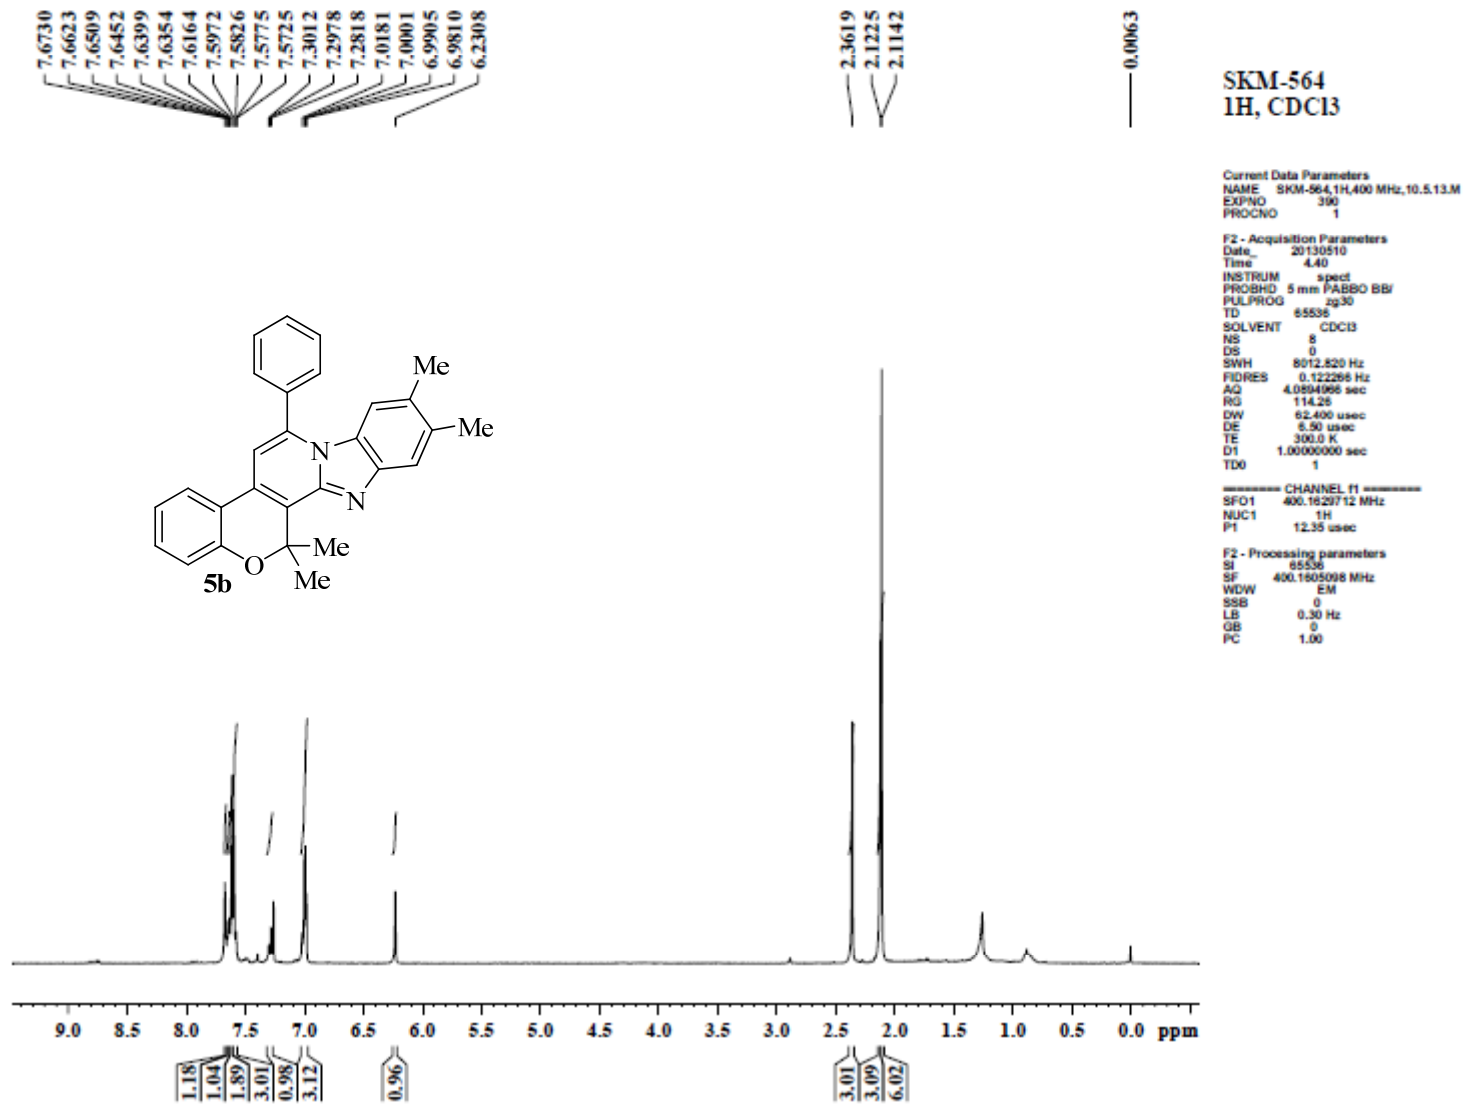

**Figure 27:** <sup>1</sup>H -NMR Spectrum of **5b**.

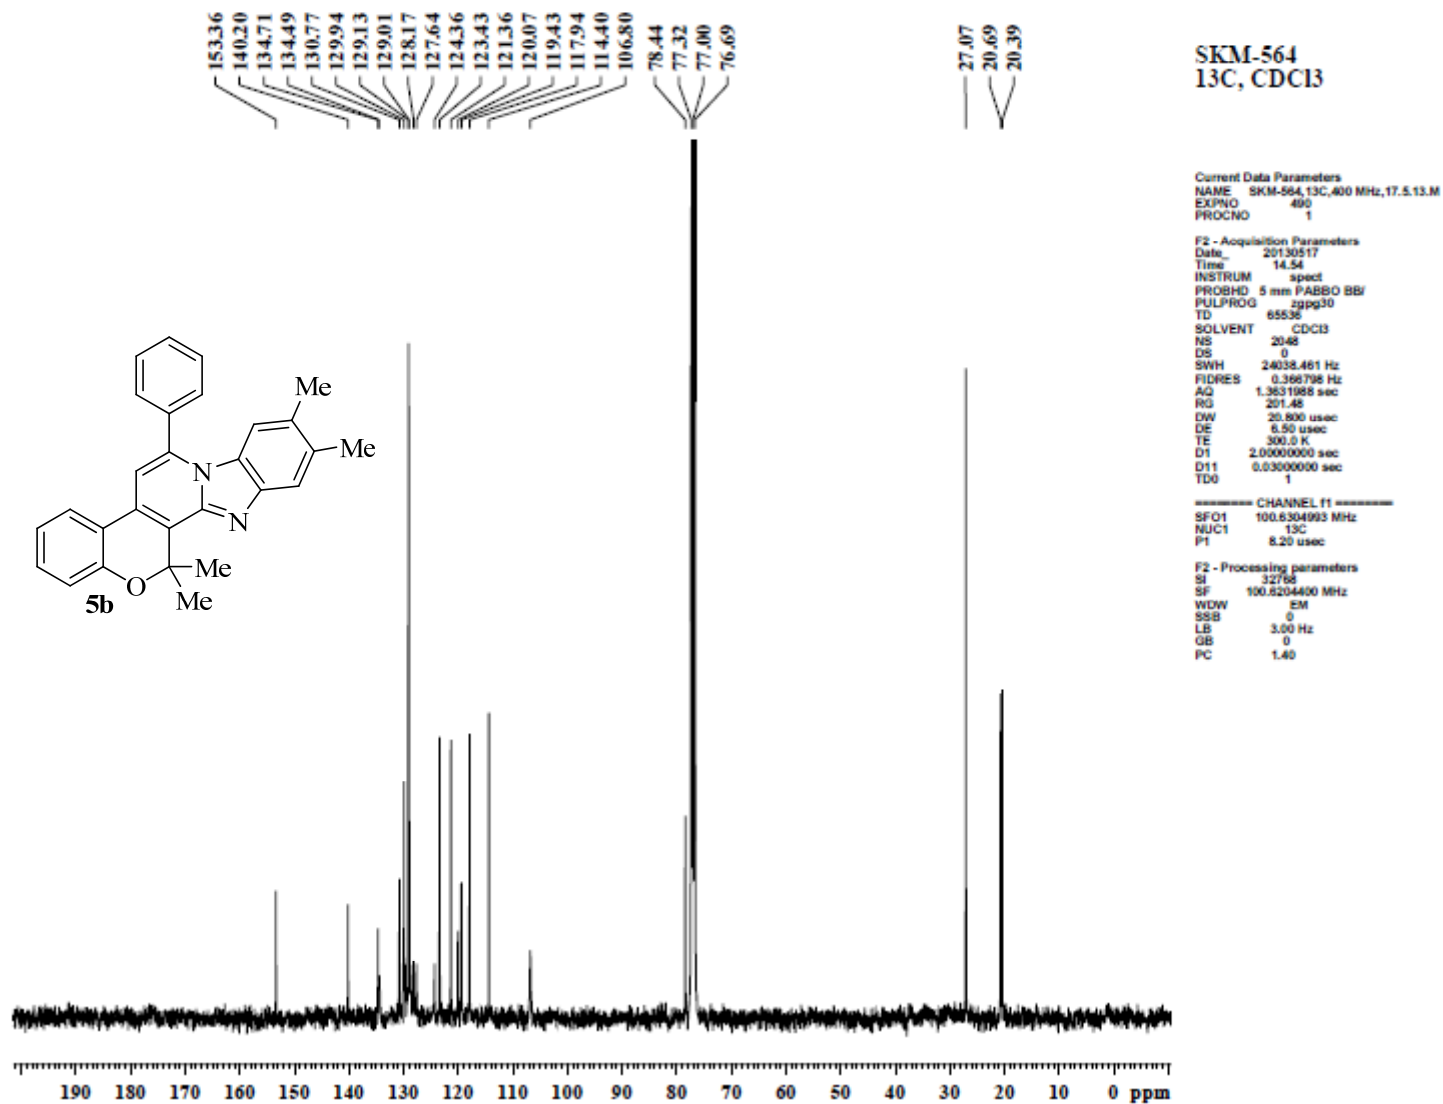

**Figure 28:** <sup>13</sup>C -NMR Spectrum of **5b**.

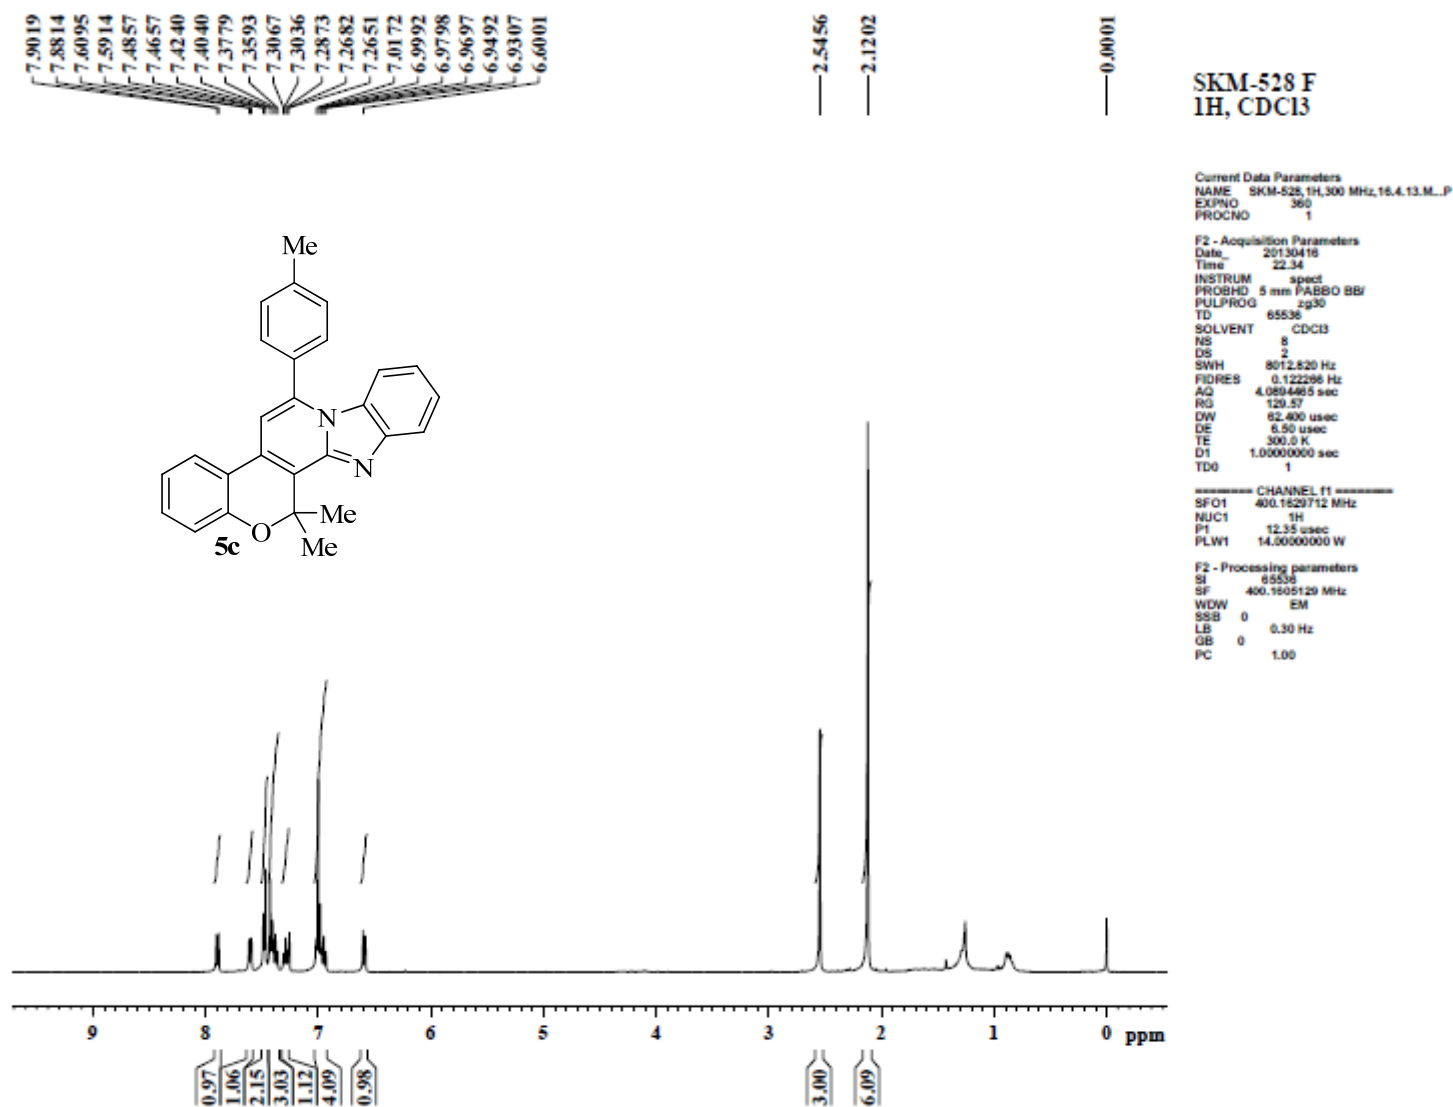

**Figure 29:**  $^1\text{H}$ -NMR Spectrum of **5c**.

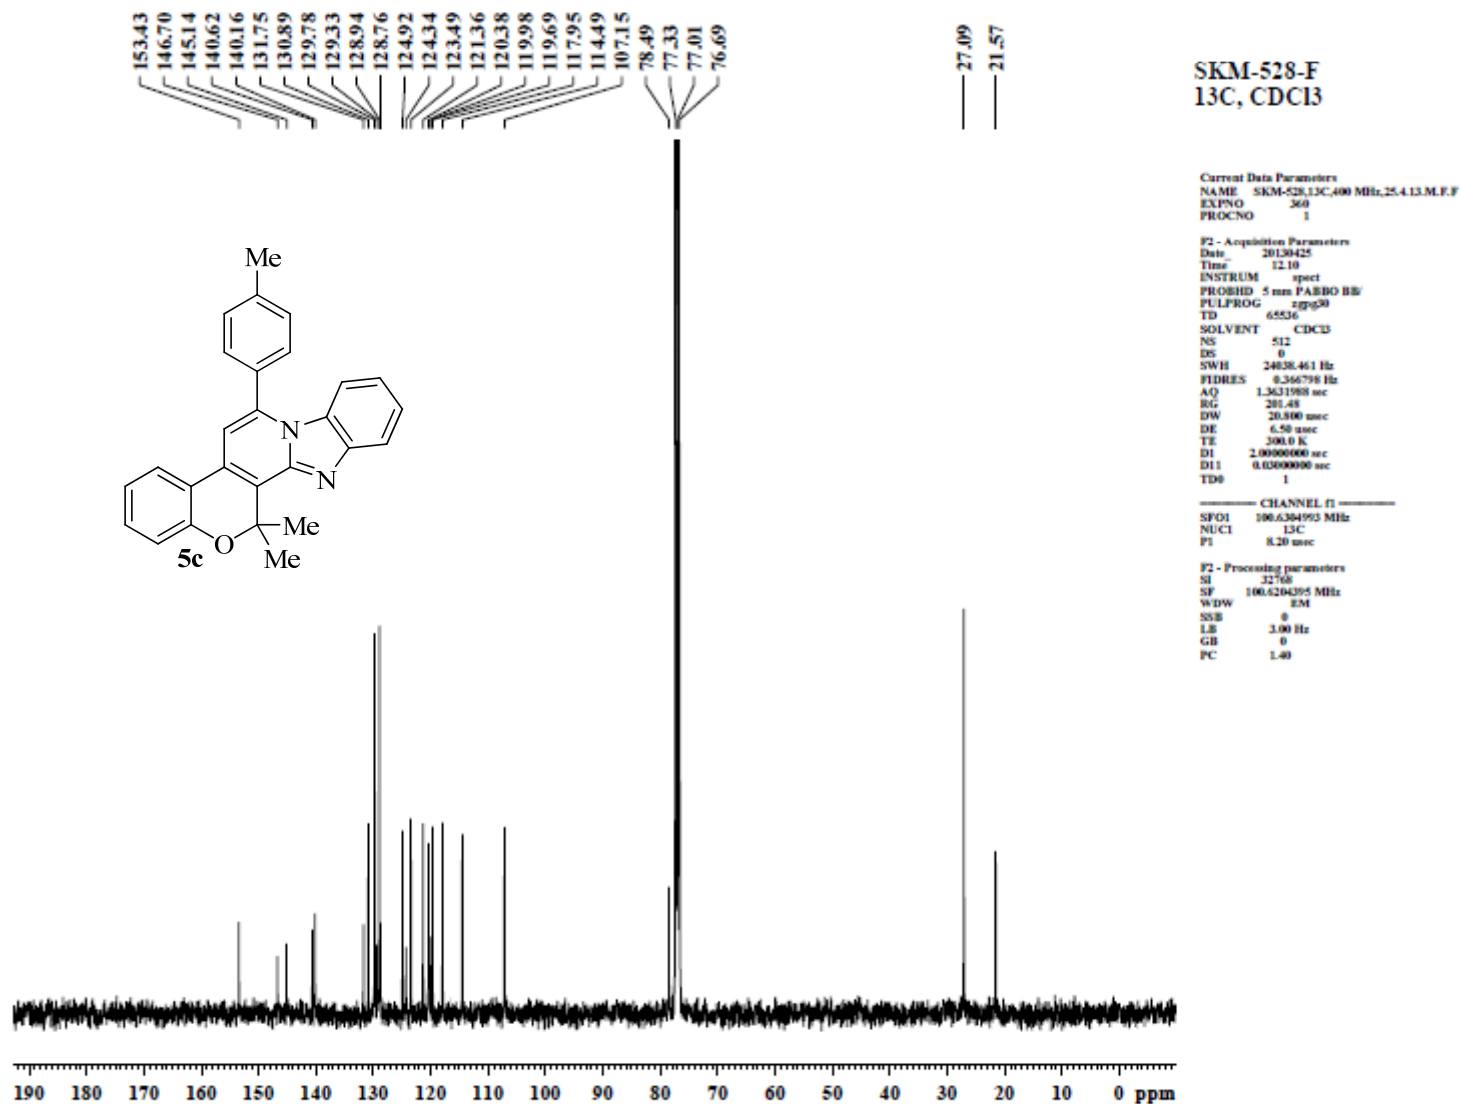

**Figure 30:** <sup>13</sup>C -NMR Spectrum of **5c**.

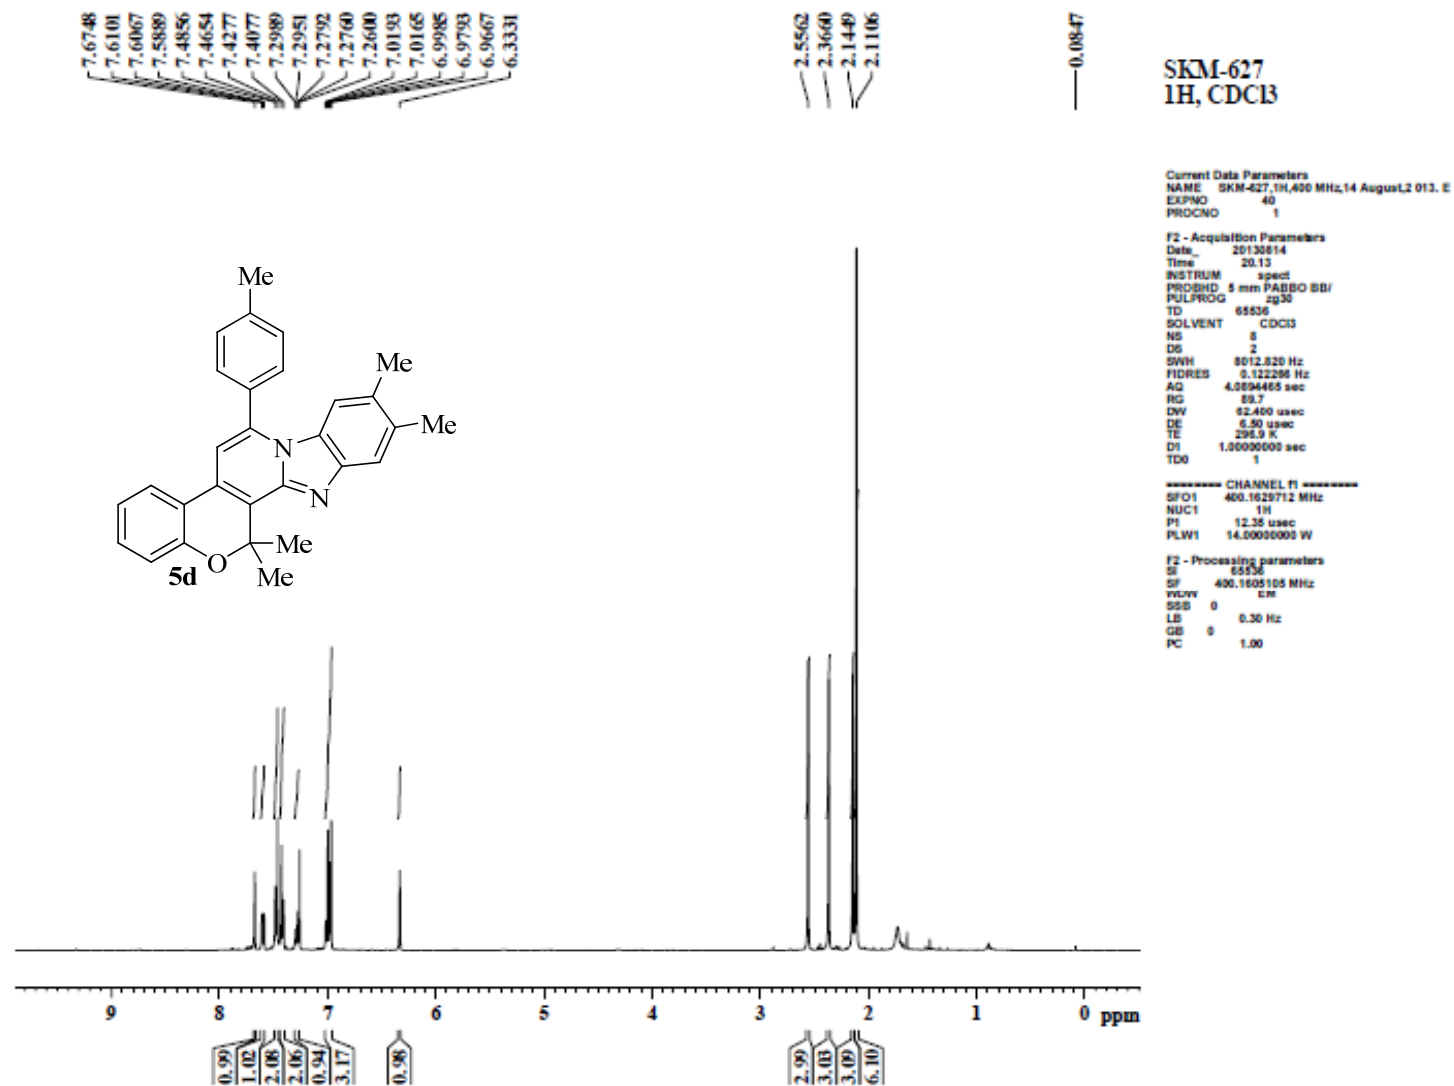

**Figure 31:** <sup>1</sup>H -NMR Spectrum of **5d**.

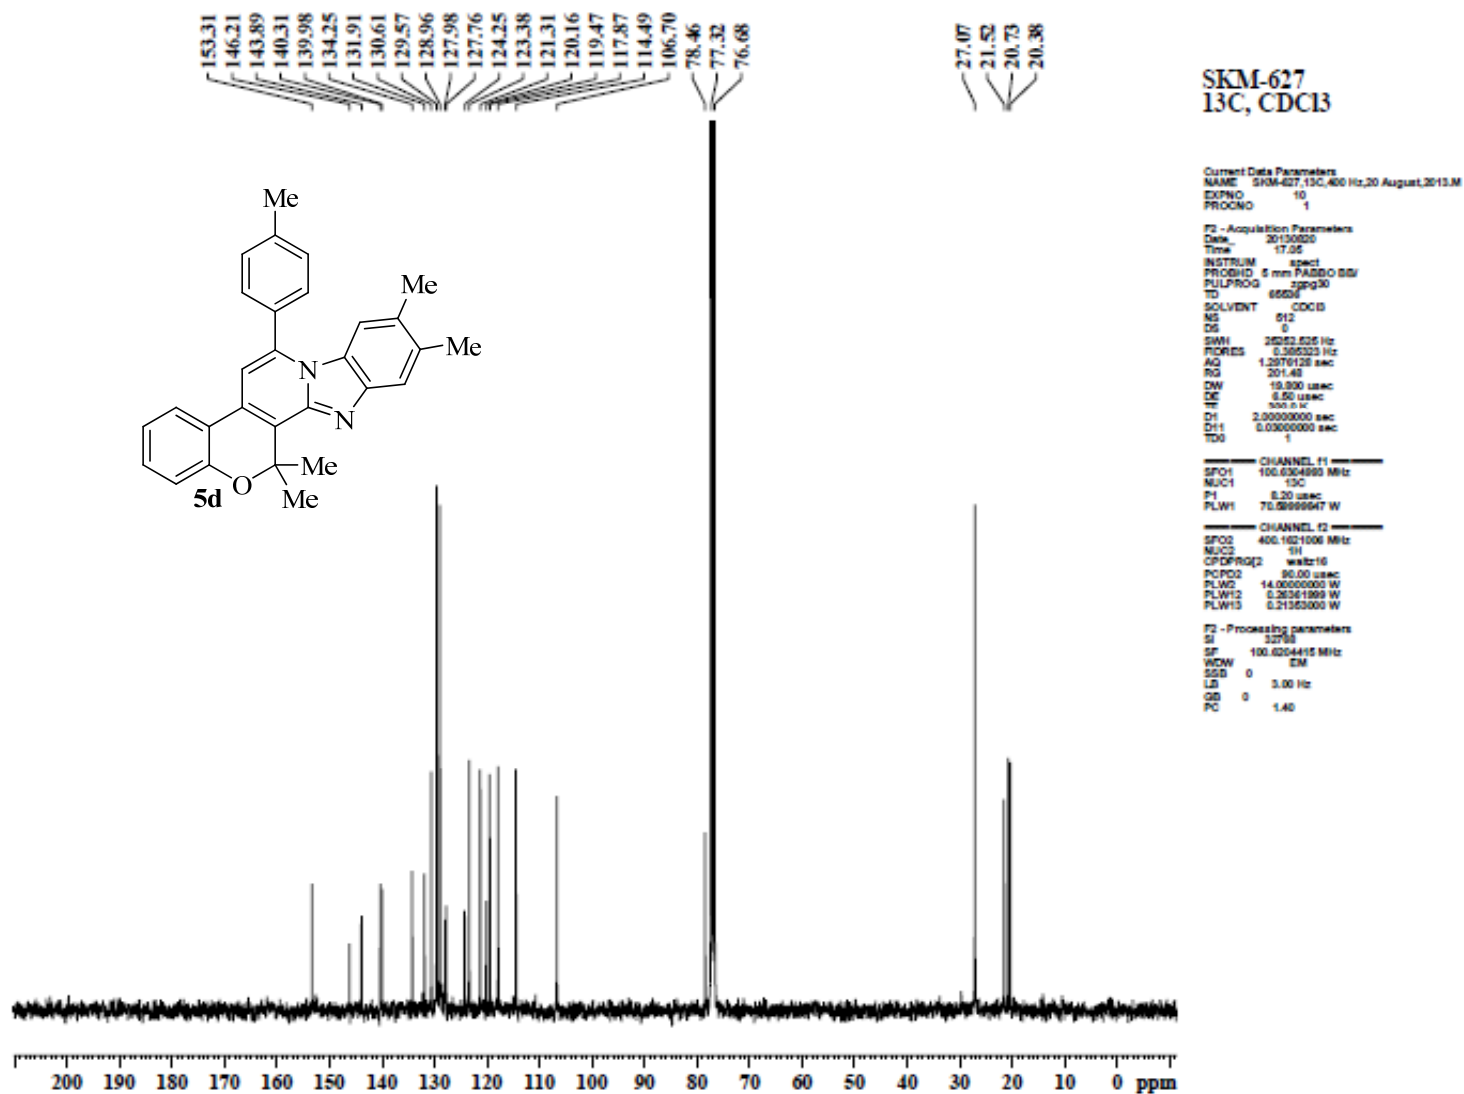

**Figure 32:**  $^{13}\text{C}$  -NMR Spectrum of **5d**.

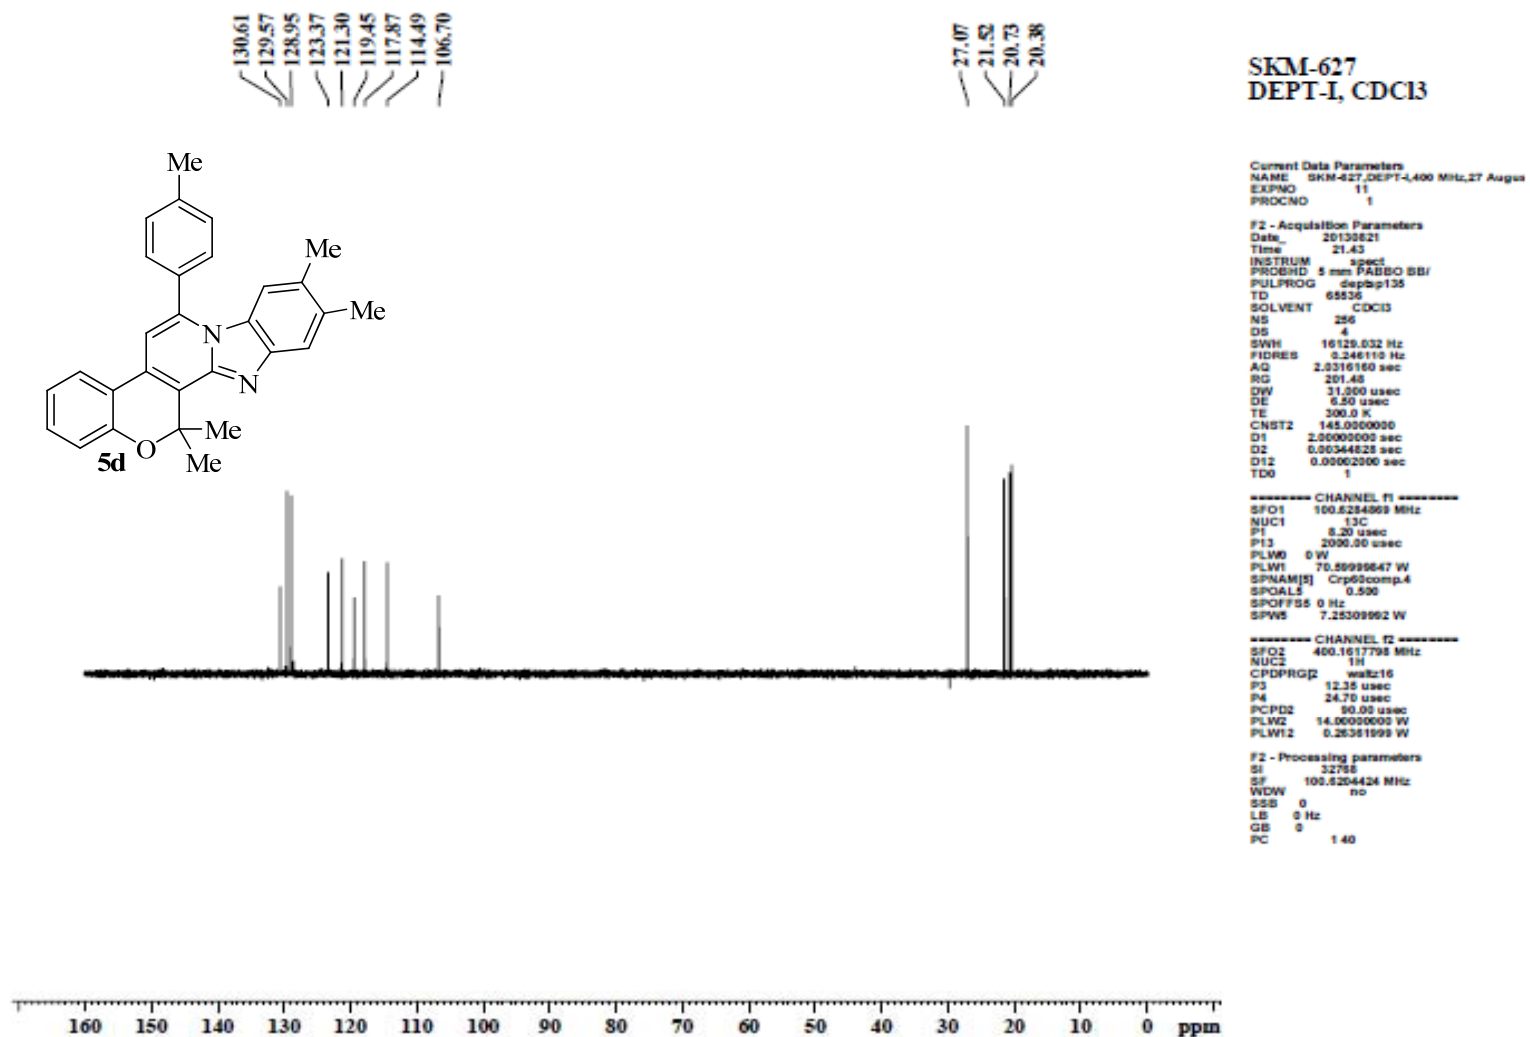

Figure 33: DEPT-I -Spectrum of **5d**.

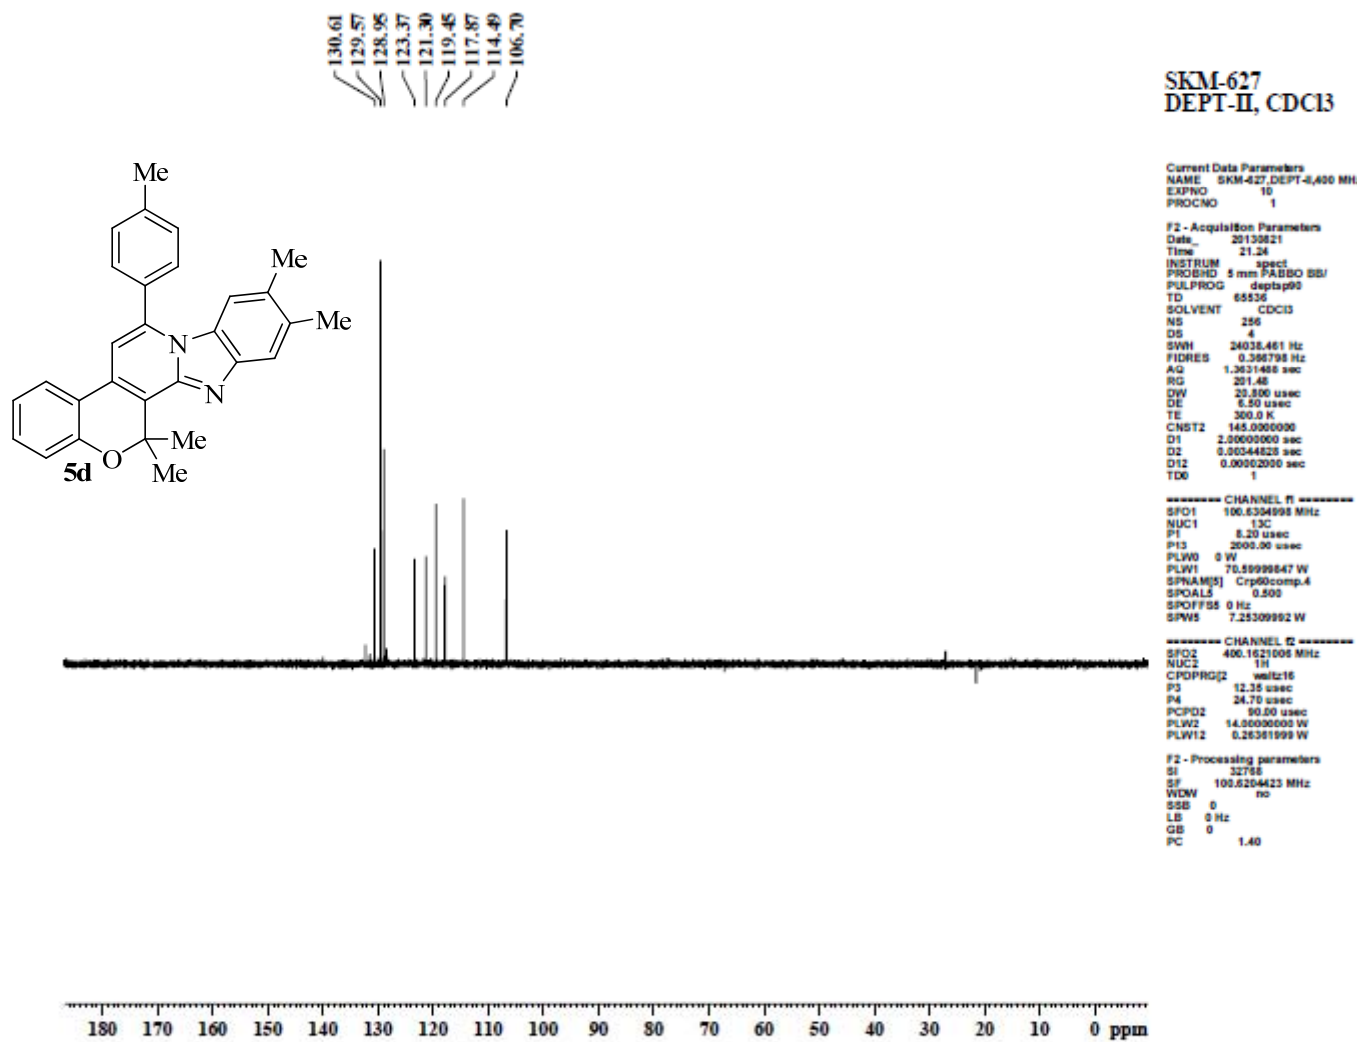

**Figure 34: DEPT-II -Spectrum of 5d.**



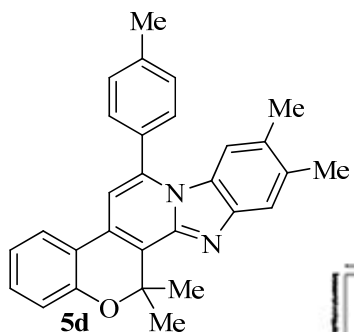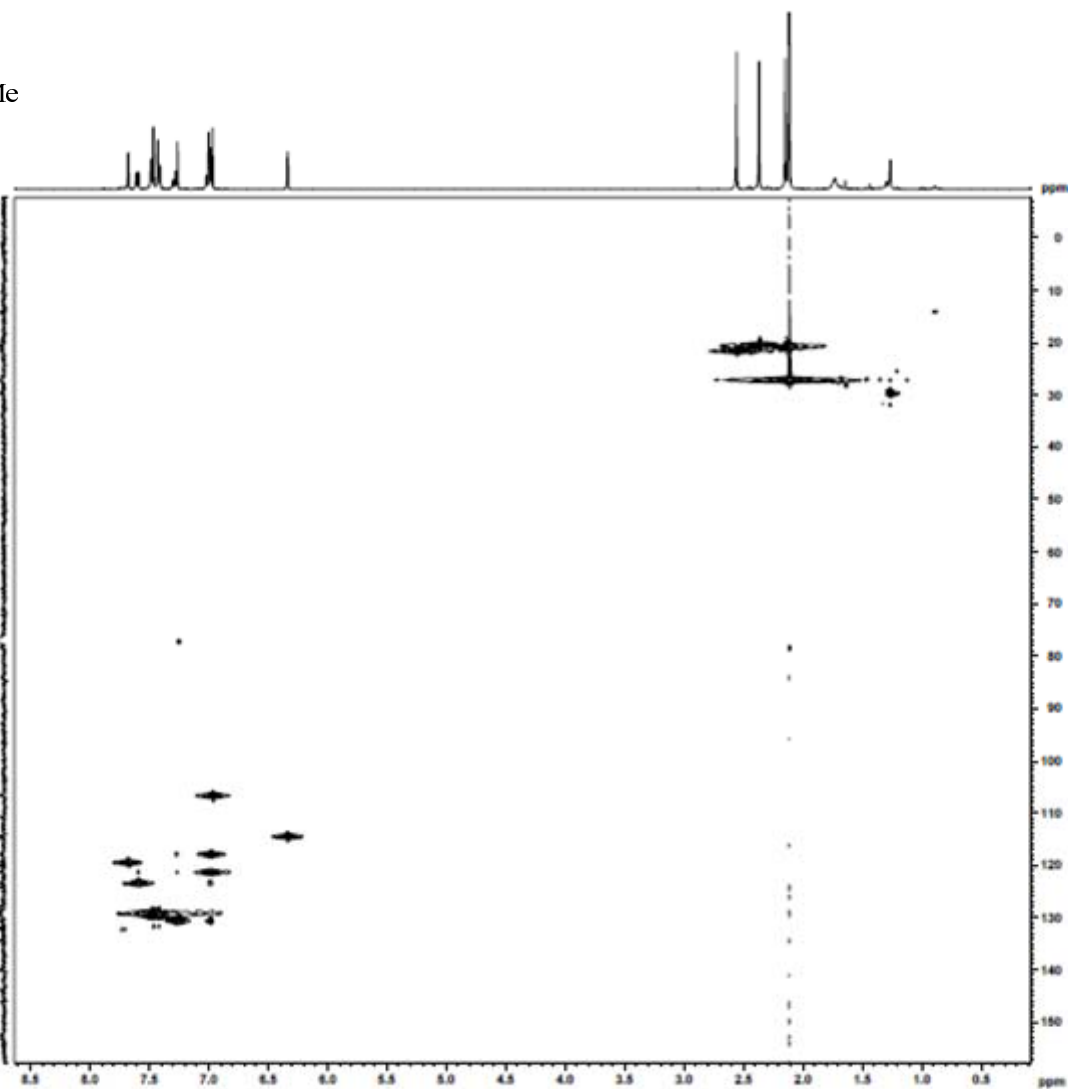

**SKM-627**  
**HSQC, CDCl3**

Current Data Parameters  
 NAME SKM-627.HSQC, 400 MHz, 23 A  
 EXPNO 11  
 PROCNO 1

F2 - Acquisition Parameters  
 Date\_ 20130824  
 Time 5.35  
 INSTRUM spect  
 PROBHD 5 mm PABBO BB/  
 PULPROG hsqcetps2  
 TD 1024  
 SOLVENT CDCl3  
 NS 16  
 DS 16  
 SWH 3424.657 Hz  
 FIDRES 3.344382 Hz  
 AQ 0.1495040 sec  
 RG 201.68  
 DW 146.000 usec  
 DE 6.50 usec  
 TE 300.0 K  
 CNST2 145.000000  
 D0 0.00000000 sec  
 D1 1.44864703 sec  
 D4 0.00172614 sec  
 D11 0.03000000 sec  
 D16 0.00020000 sec  
 D24 0.0006207 sec  
 RNO 0.00000000 sec  
 ZGOPTNS

==== CHANNEL F1 =====  
 SFO1 400.1622543 MHz  
 NUC1 131  
 P1 12.35 usec  
 P2 24.70 usec  
 P28 1000.00 usec  
 PLW1 14.00000000 W

==== CHANNEL F2 =====  
 SFO2 100.6279622 MHz  
 NUC2 13C  
 CPDPRG2 garp  
 P3 8.20 usec  
 P4 16.40 usec  
 PCPD2 80.00 usec  
 PLW2 70.59999847 W  
 PLW12 0.74172999 W

==== GRADIENT CHANNEL =====  
 GPNAM[1] SMSQ10.100  
 GPNAM[2] SMSQ10.100  
 GPNAM[3] SMSQ10.100  
 GPNAM[4] SMSQ10.100  
 GPZ1 90.00 %  
 GPZ2 20.10 %  
 GPZ3 11.00 %  
 GPZ4 -6.00 %  
 P16 1000.00 usec  
 P19 600.00 usec

F1 - Acquisition parameters  
 TD 256  
 SFO1 100.628 MHz  
 FIDRES 66.104164 Hz  
 SW 165.627 ppm  
 FWHOOE Echo-AtBecho

F2 - Processing parameters

**Figure 35: HSQC -Spectrum of 5d.**

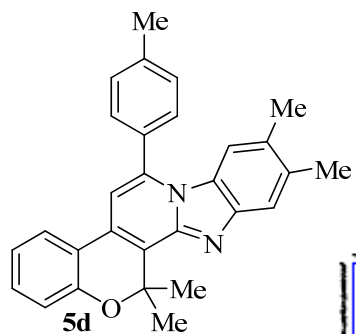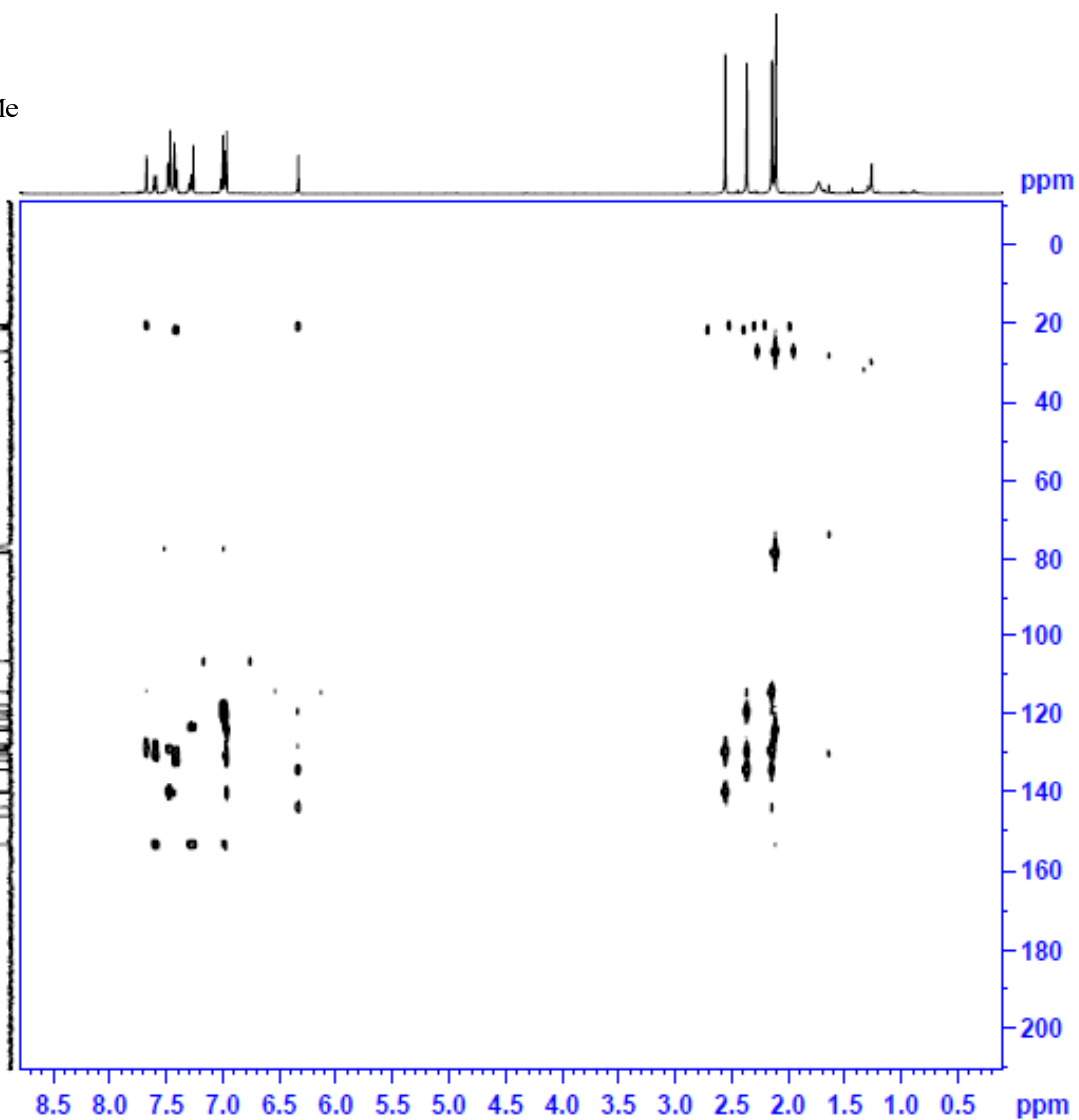

SKM-627  
HMBC, CDCl<sub>3</sub>

Current Data Parameters  
 NAME SKM-627, HMBC, 400 MHz, 22 Aug  
 EXPNO 11  
 PROCNO 1

F2 - Acquisition Parameters  
 Date\_ 20130823  
 Time 1.15  
 INSTRUM spect  
 PROBNM 5 mm PABBO BB/  
 PULPROG hmcsgplpndqf  
 TD 2048  
 SOLVENT CDCl<sub>3</sub>  
 NS 4  
 DS 16  
 SWH 5472.222 Hz  
 FIDRES 1.695421 Hz  
 AQ 0.2949120 sec  
 RG 201.48  
 DW 144.000 usec  
 DE 8.50 usec  
 TE 300.2 K  
 CNST2 145.000000  
 CNST3 10.000000  
 D0 0.00000300 sec  
 D1 1.40210605 sec  
 D2 0.00344825 sec  
 D3 0.05000000 sec  
 D15 0.00020000 sec  
 INO 0.00002240 sec

==== CHANNEL F1 =====  
 SFO1 400.1622905 MHz  
 NUC1 13C  
 P1 12.35 usec  
 P2 24.70 usec  
 PLW1 14.00000000 W

==== CHANNEL F2 =====  
 SFO2 100.6304833 MHz  
 NUC2 13C  
 P3 8.20 usec  
 PLW2 70.59998647 W

==== GRADIENT CHANNEL =====  
 GPNAM[1] SMSQ10.100  
 GPNAM[2] SMSQ10.100  
 GPNAM[3] SMSQ10.100  
 GPZ1 50.00 %  
 GPZ2 30.00 %  
 GPZ3 40.10 %  
 P15 1000.00 usec

F1 - Acquisition parameters  
 TD 128  
 SFO1 100.6305 MHz  
 FIDRES 174.386154 Hz  
 SW 221.516 ppm  
 FwMODE QF

F2 - Processing parameters  
 SI 2048  
 SF 400.1605118 MHz  
 WDW SINE  
 SSB 0  
 LB 0 Hz  
 GB 0

Figure 36: HMBC -Spectrum of **5d**.

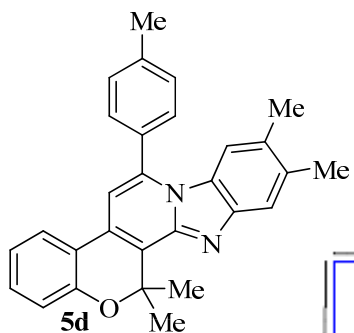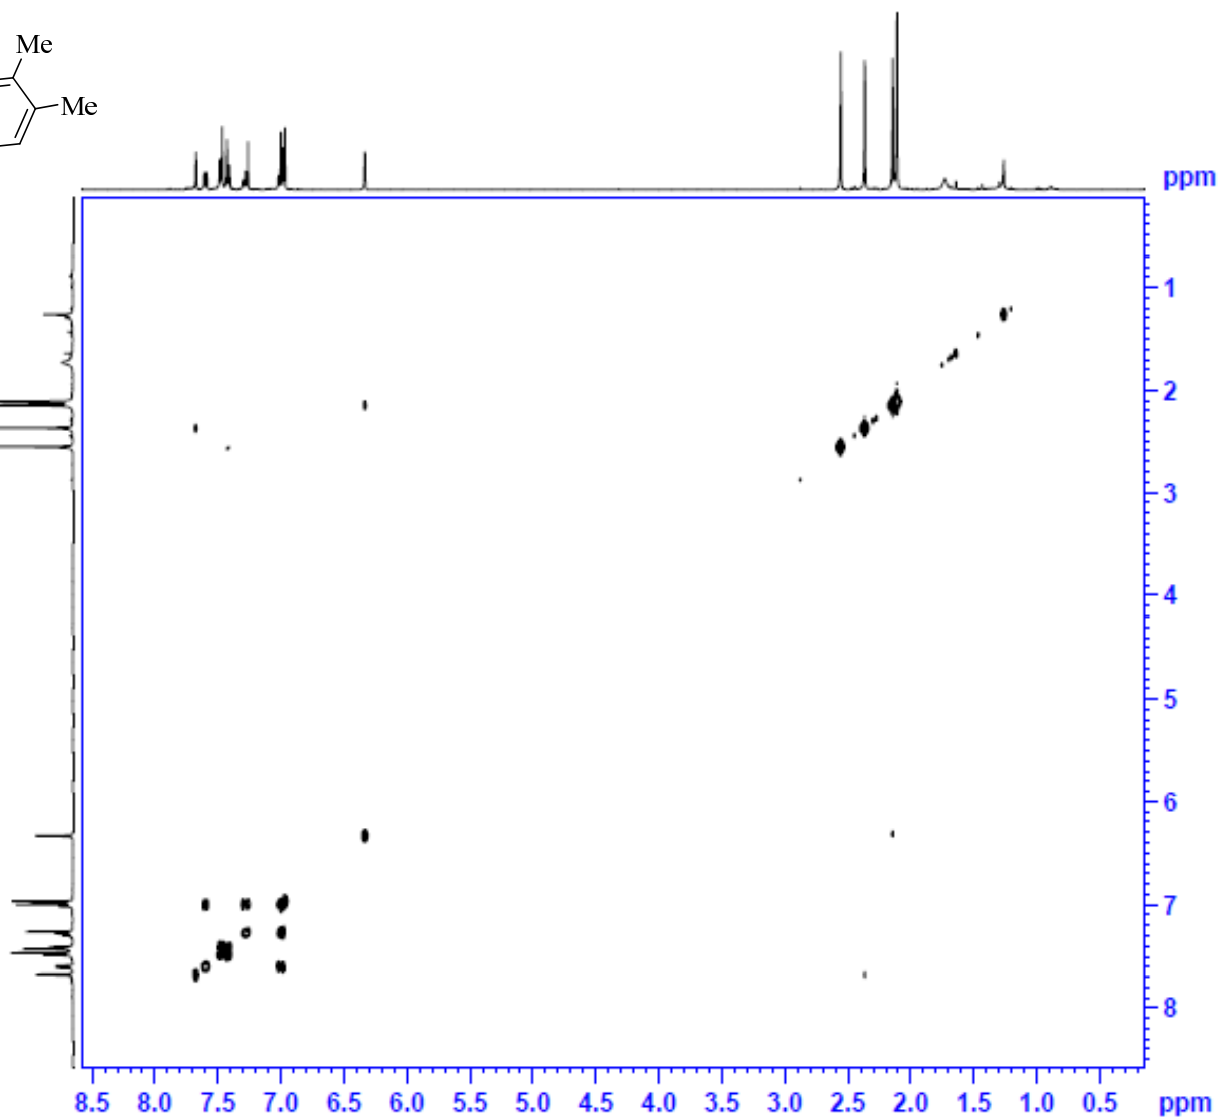

SKM-627  
COSY, CDC13

Current Data Parameters  
NAME SKM-627\_COSY\_400 MHz, 271  
EXPNO 4  
PROCNO 1

F2 - Acquisition Parameters  
Date\_ 20130208  
Time 4.53  
INSTRUM spect  
PROBHD 5 mm PABBO BB1  
PULPROG cosypppof  
TD 2948  
SOLVENT CDC13  
NS 1  
DS 8  
SWH 3378.378 Hz  
FIDRES 1.648590 Hz  
AQ 0.3021940 sec  
RG 65.85  
DW 140.000 usec  
DE 8.90 usec  
TE 298.1 K  
D0 0.0000000 sec  
D1 1.0000000 sec  
D11 0.0000000 sec  
D12 0.0000000 sec  
D13 0.0000000 sec  
D18 0.0000000 sec  
IND 0.0000000 sec

\*\*\*\*\* CHANNEL f1 \*\*\*\*\*  
SFO1 400.1623600 MHz  
NUC1 13H  
P0 12.35 usec  
P1 12.35 usec  
P17 2500.00 usec  
PLW1 14.00000000 W  
PLW18 3.10079600 W

\*\*\*\*\* GRADIENT CHANNEL \*\*\*\*\*  
GPRAMP1 500000.000  
GPZ1 10.00 %  
P16 1000.00 usec

F1 - Acquisition parameters  
TD 128  
SFO1 400.1623 MHz  
FIDRES 26.300501 Hz  
SW 0.443 ppm  
FRMODE GF

F2 - Processing parameters  
SI 1024  
SF 400.1600000 MHz  
WOW 0.50000000  
SSB 0  
LB 0 Hz  
GB 0  
PC 1.40

F1 - Processing parameters  
SI 1024  
MC2 GF  
SF 400.1600000 MHz

Figure 37: COSY -Spectrum of **5d**.

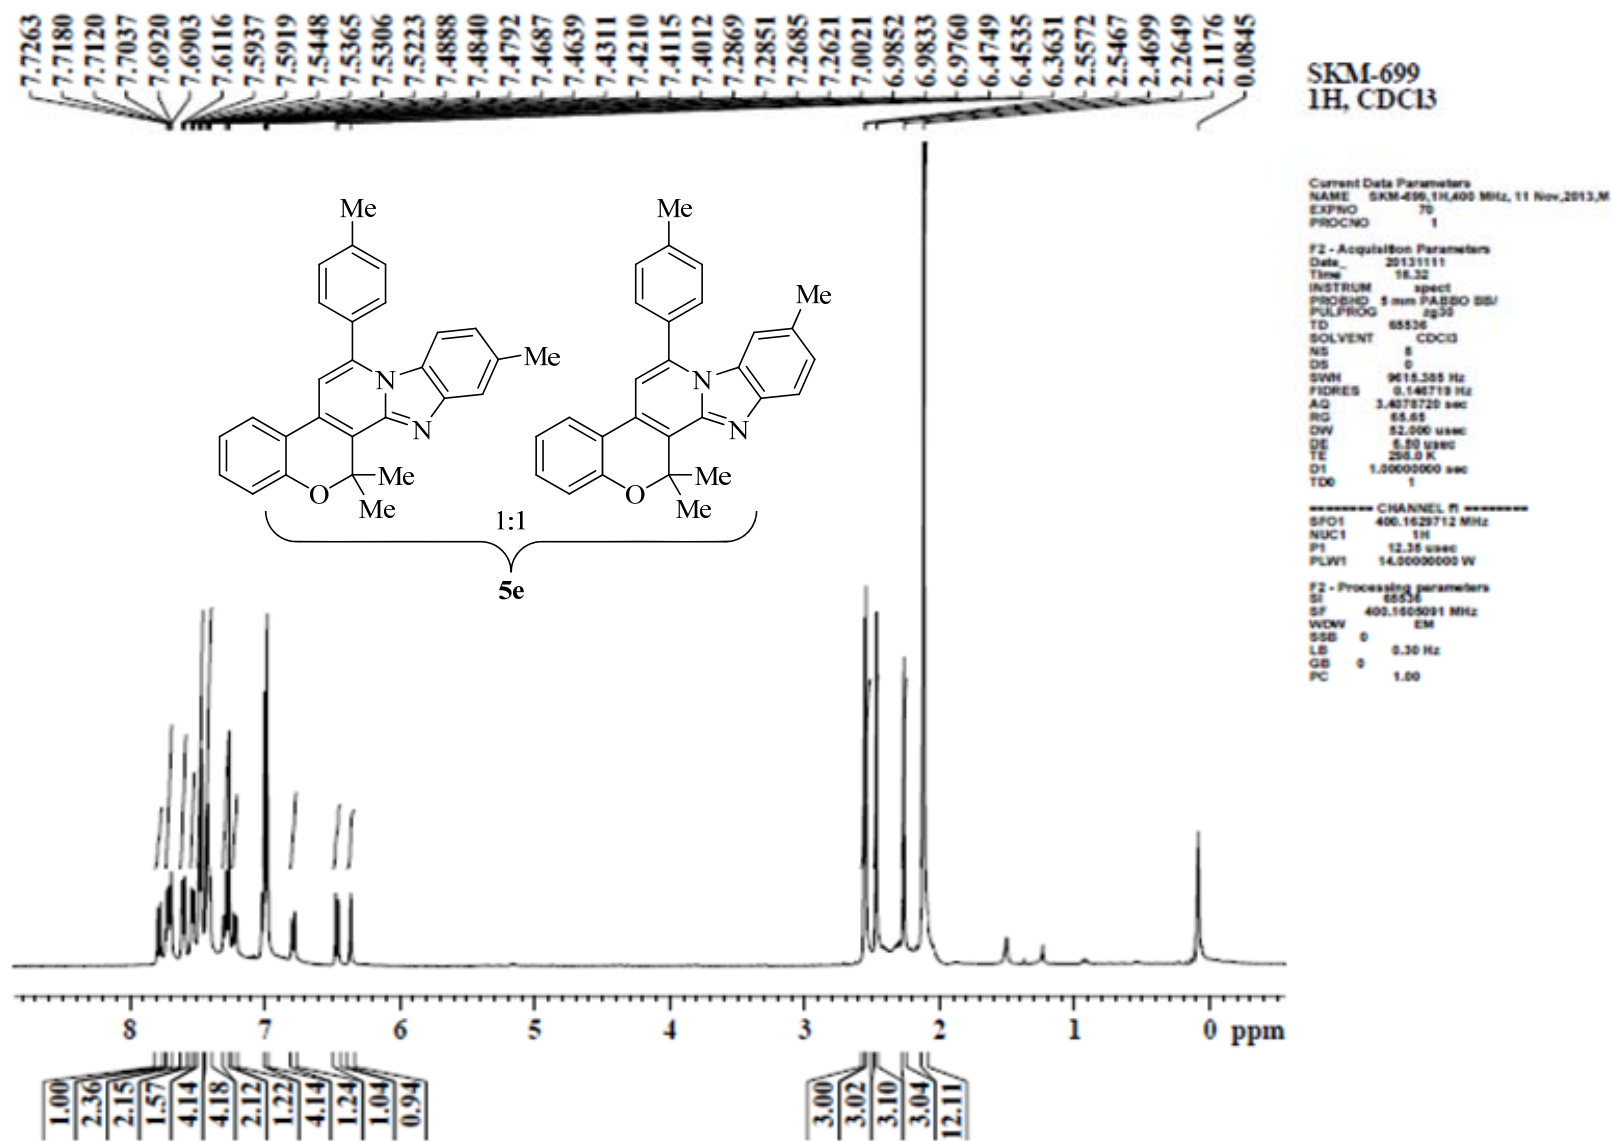

Figure 38: <sup>1</sup>H -NMR Spectrum of **5e**.

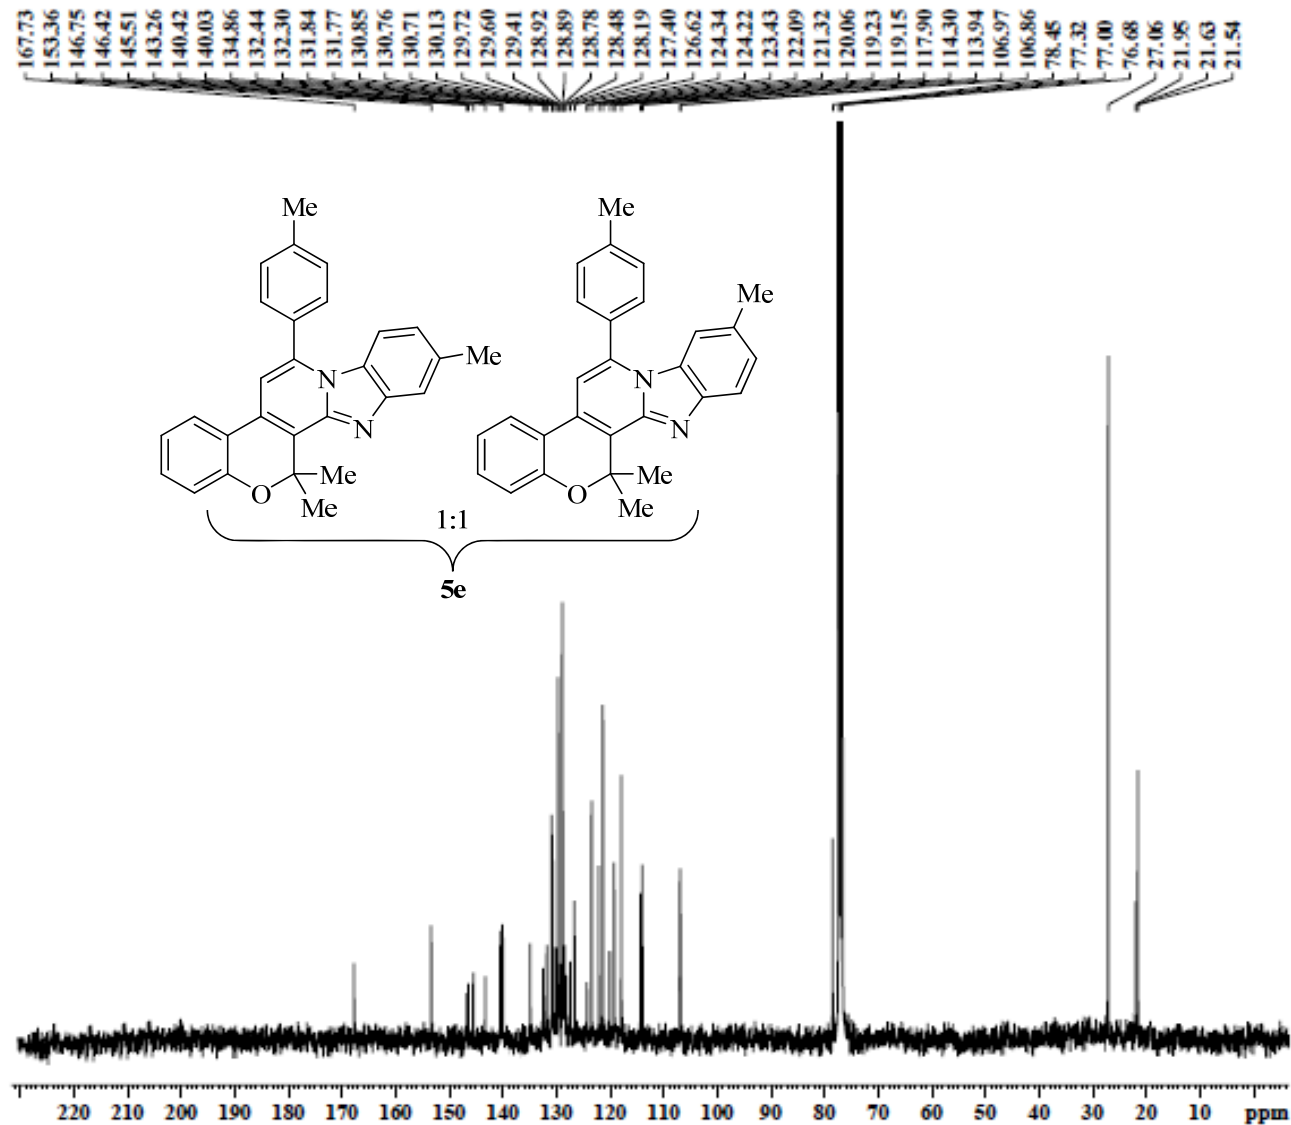

Figure 39: <sup>13</sup>C -NMR Spectrum of 5e.

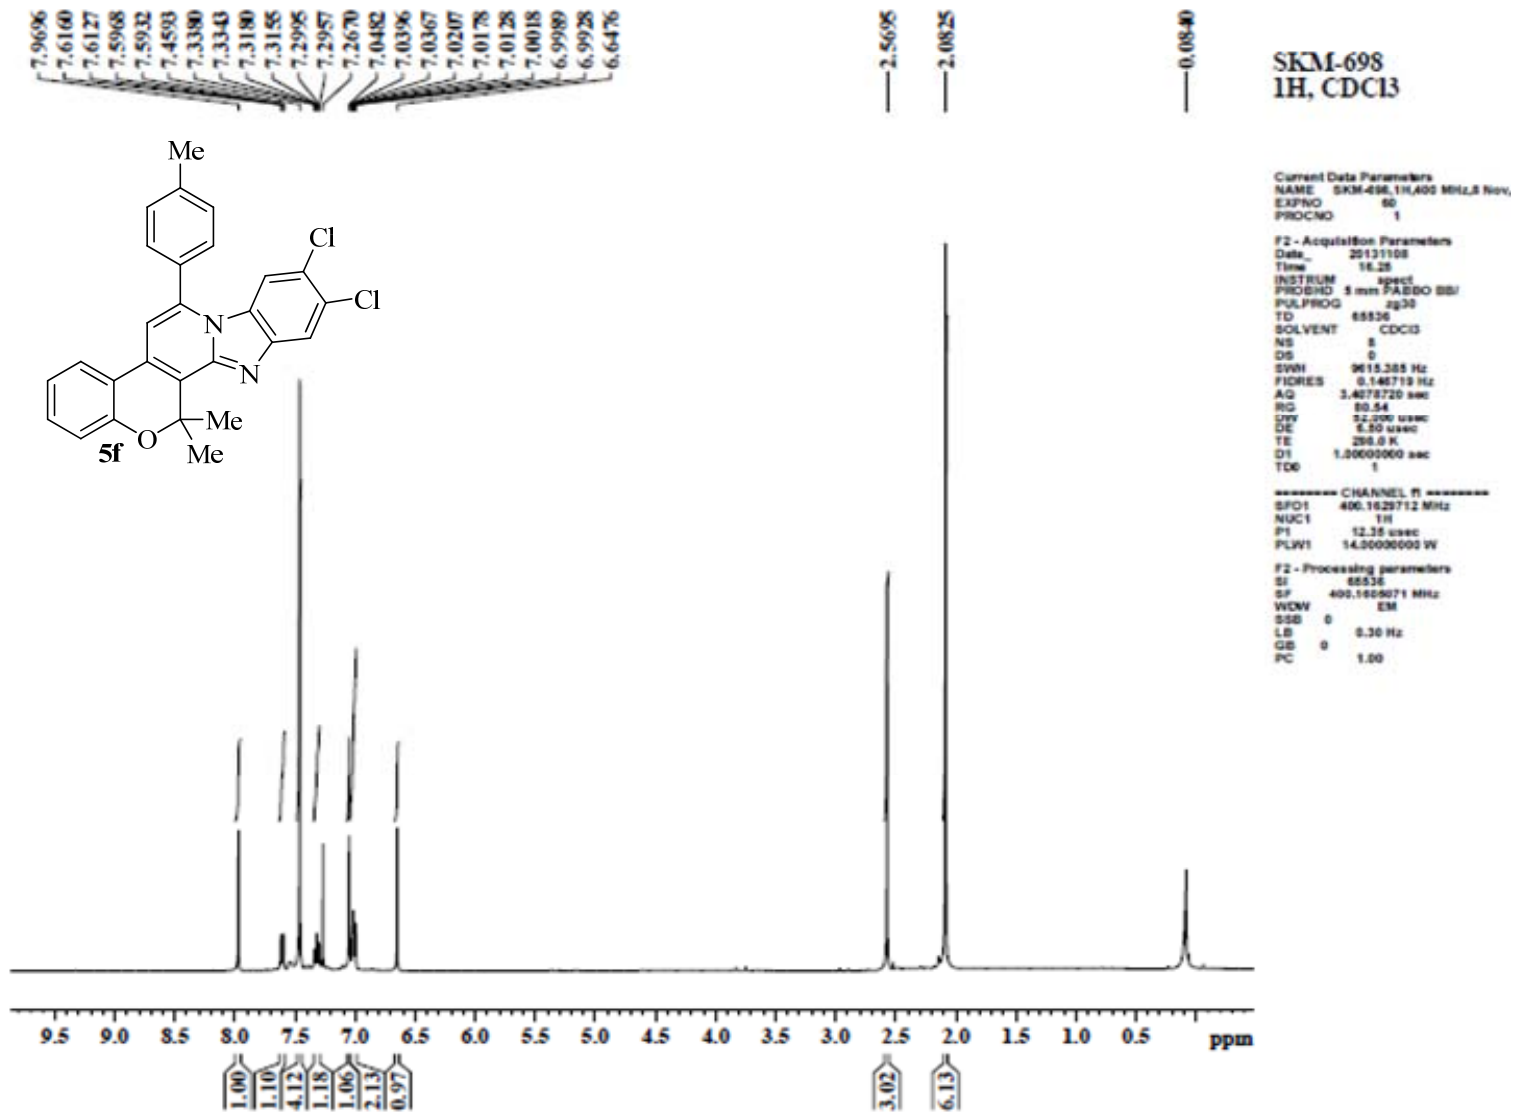

**Figure 40:** <sup>1</sup>H -NMR Spectrum of **5f**.

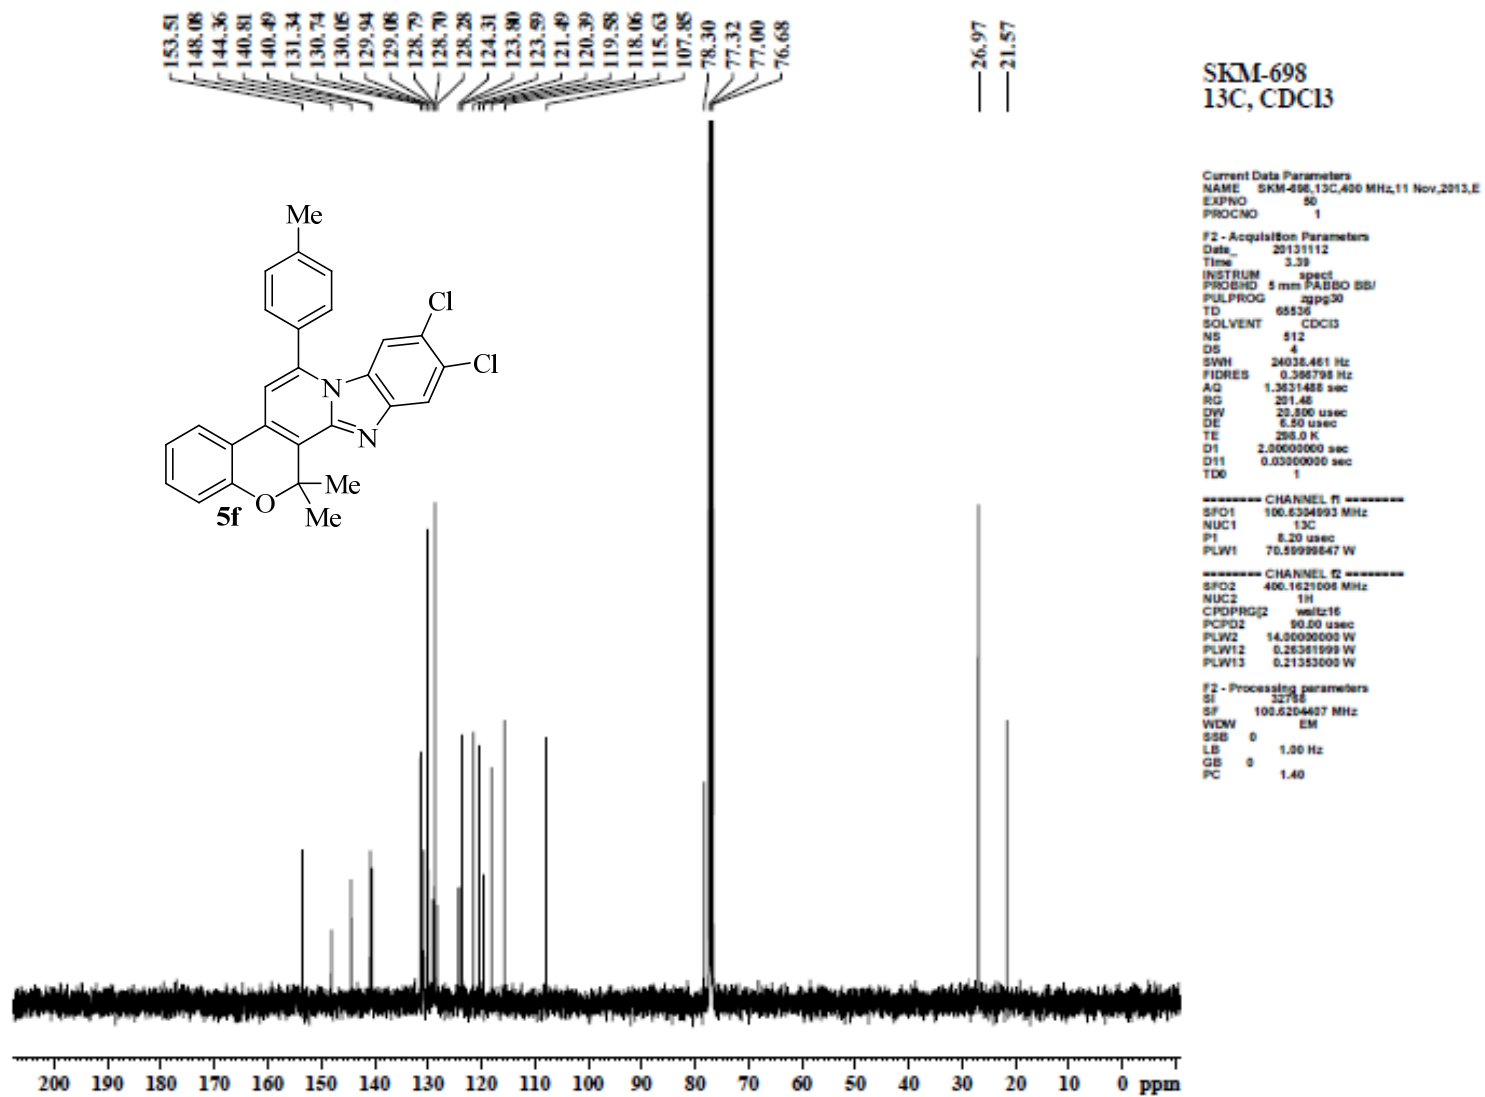

**Figure 41:**  $^{13}\text{C}$  -NMR Spectrum of **5f**.

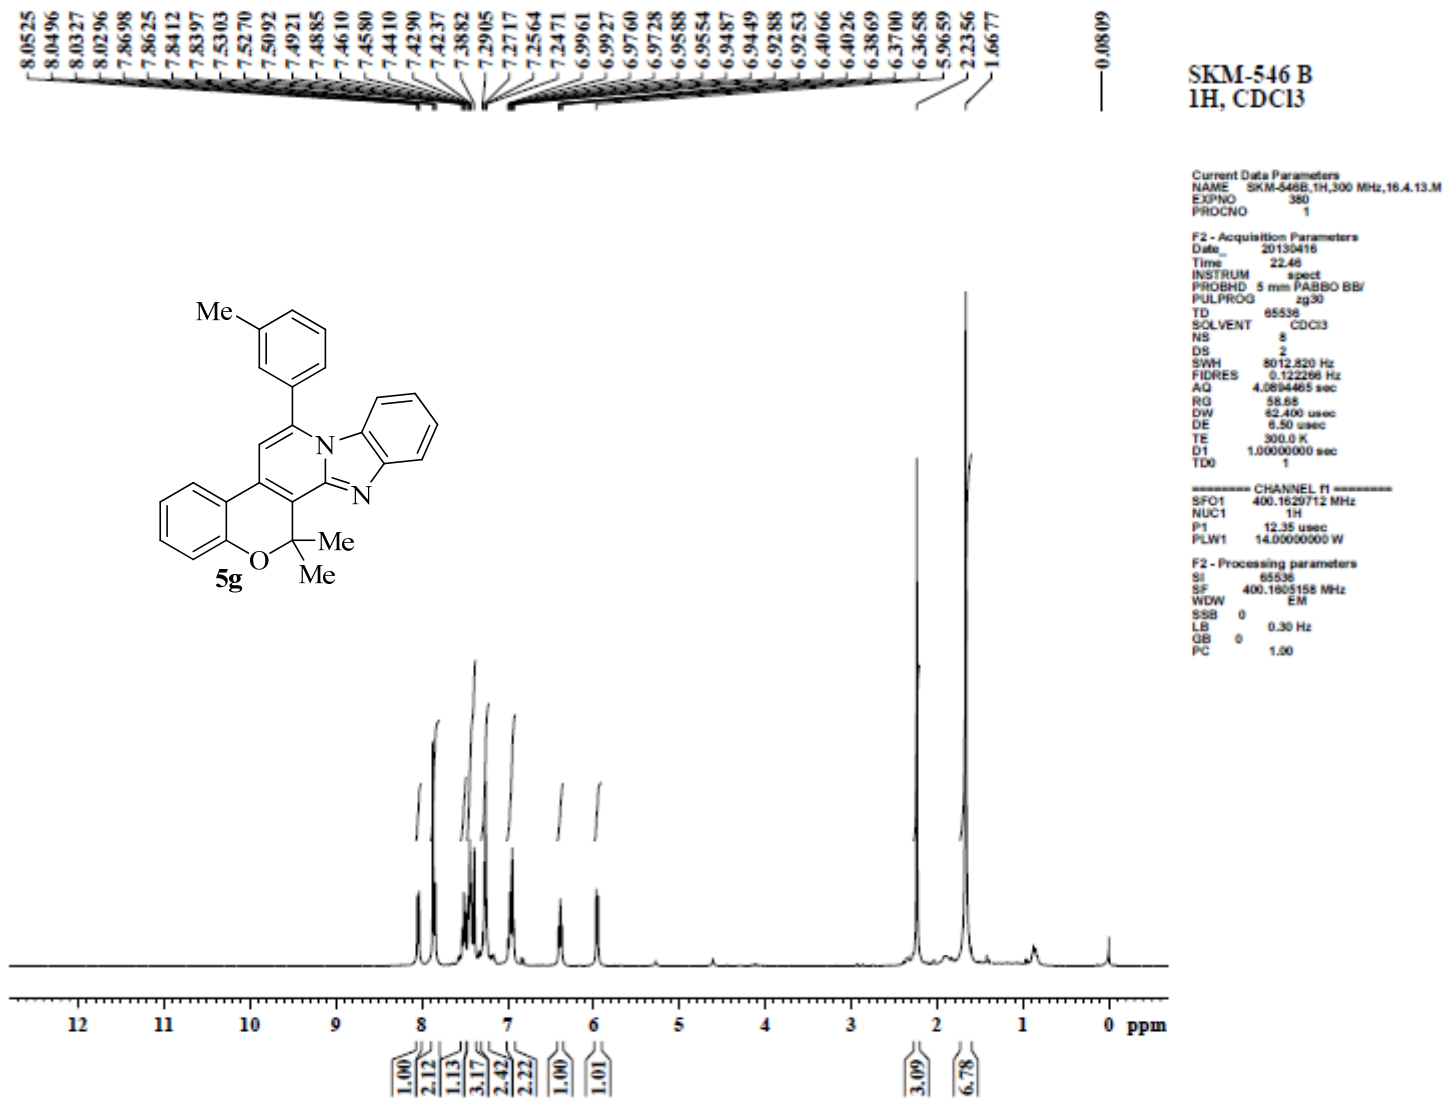

**Figure 42:**  $^1\text{H}$  -NMR Spectrum of **5g**.



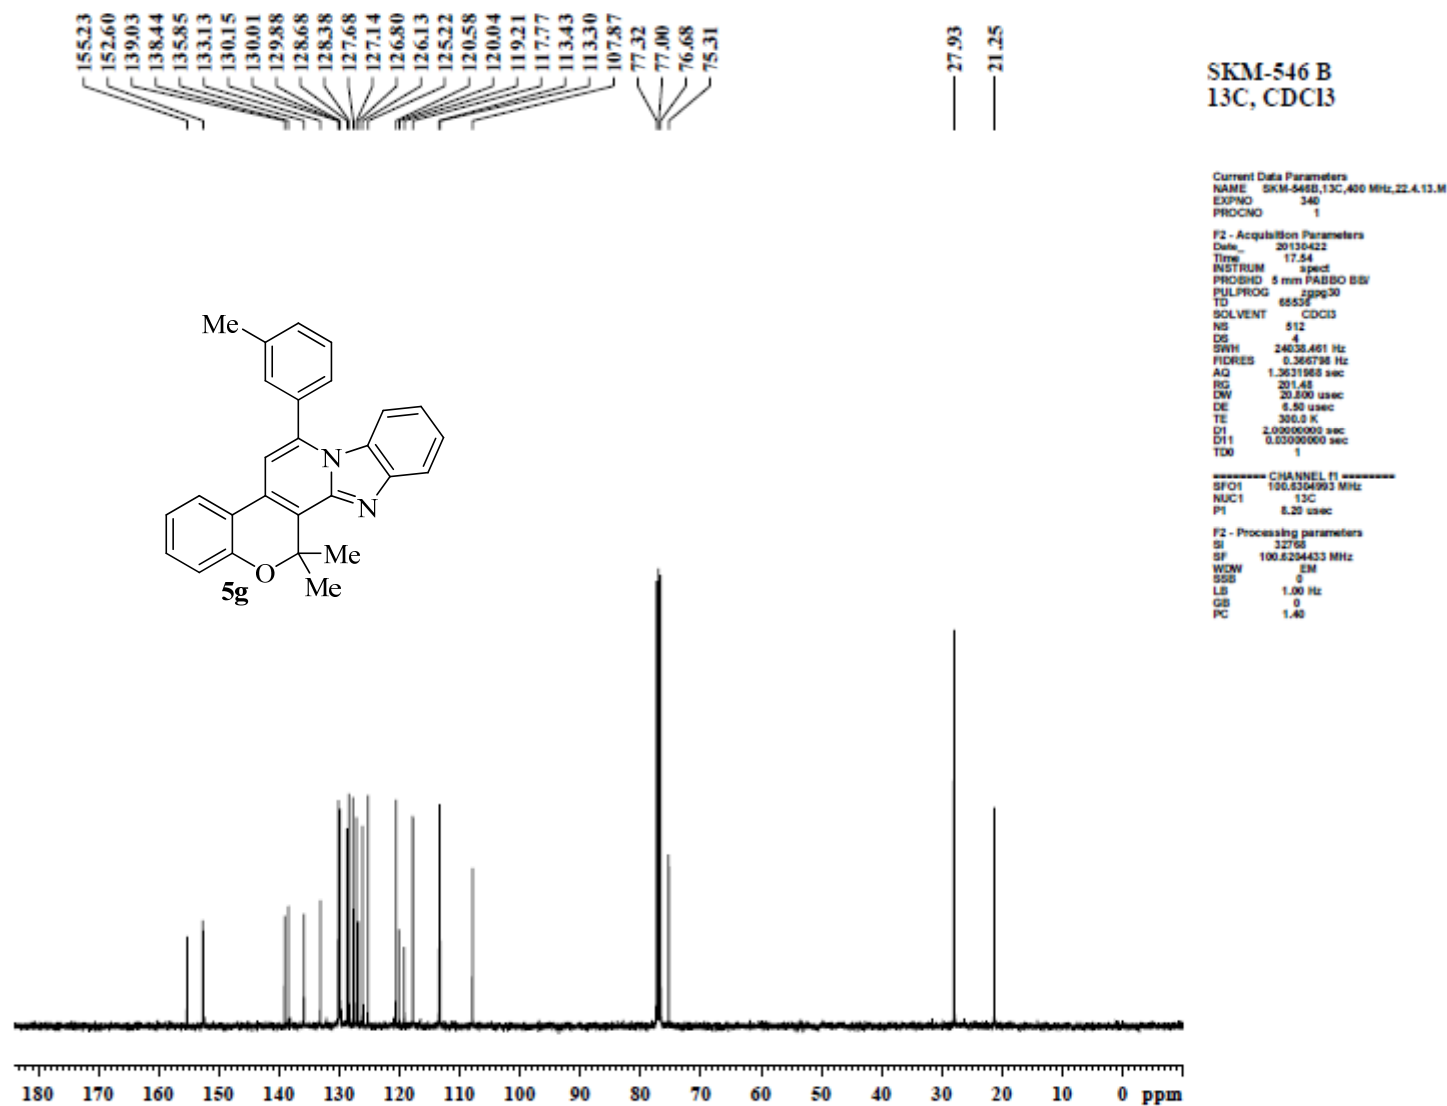

**Figure 43:**  $^{13}\text{C}$  -NMR Spectrum of **5g**.

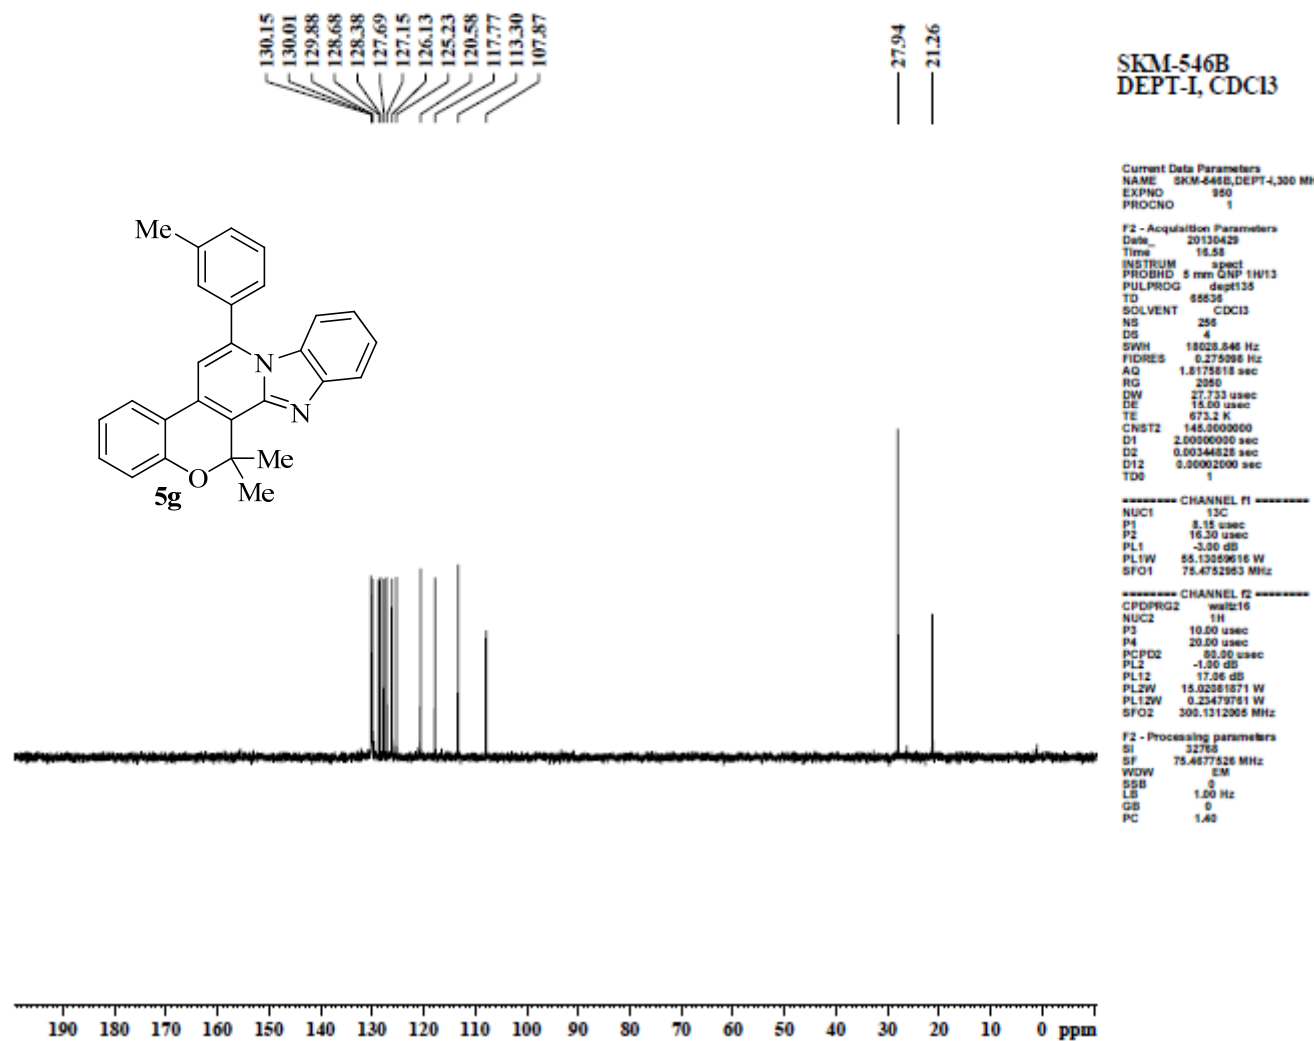

**Figure 44: DEPT -I -Spectrum of 5g.**

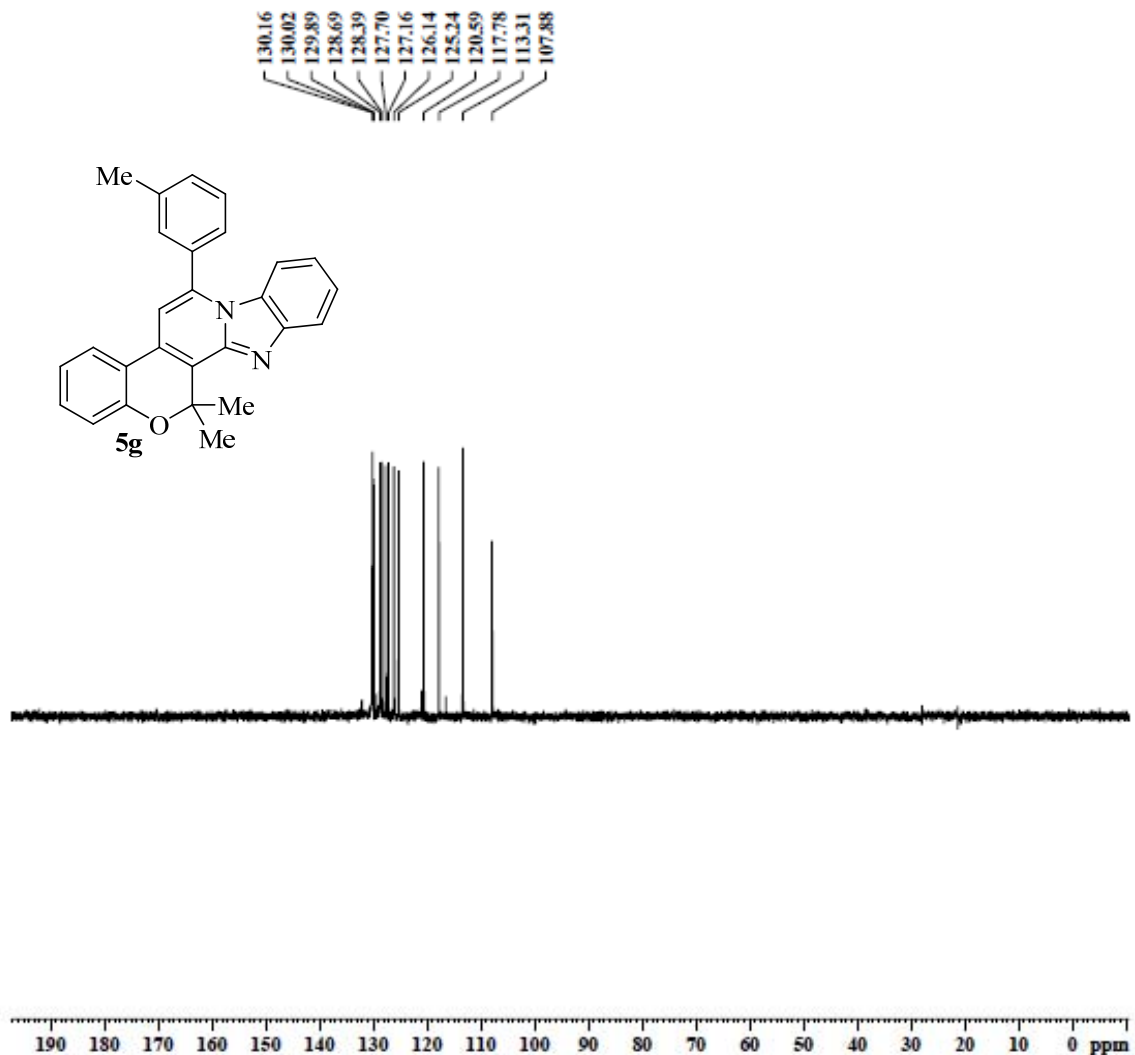

**SKM-546B**  
**DEPT-II, CDC13**

Current Data Parameters  
NAME SKM-546B,DEPT-II, 300 MHz,20.4.13.E  
EXPNO 951  
PROCNO 1

F2 - Acquisition Parameters  
Date\_ 20130429  
Time 17.15  
INSTRUM spect  
PROBHD 5 mm QNP 1H/13  
PULPROG dept90  
TD 65536  
SOLVENT CDC13  
NS 256  
DS 4  
SWH 15023.346 Hz  
FIDRES 0.275958 Hz  
AQ 1.8175813 sec  
RG 2080  
DW 27.733 usec  
DE 15.50 usec  
TE 673.2 K  
CNST2 145.000000  
D1 2.00000000 sec  
D2 0.0034622 sec  
D12 0.0002000 sec  
TD0 1

----- CHANNEL f1 -----  
NUC1 13C  
P1 8.15 usec  
P2 16.30 usec  
PL1 -3.00 dB  
PL1W 55.13259616 W  
SFO1 75.4752953 MHz

----- CHANNEL f2 -----  
CPDPRG2 waltz16  
NUC2 1H  
P3 10.00 usec  
P4 20.00 usec  
PCPD2 80.00 usec  
PL2 -1.30 dB  
PL12 17.06 dB  
PL2W 15.02081871 W  
PL12W 0.25479761 W  
SFO2 300.1312005 MHz

F2 - Processing parameters  
SI 32768  
SF 75.4677519 MHz  
WDW EM  
SSB 0  
LB 1.00 Hz  
GB 0  
PC 1.40

**Figure 45: DEPT -II -Spectrum of 5g.**

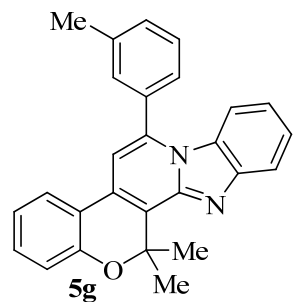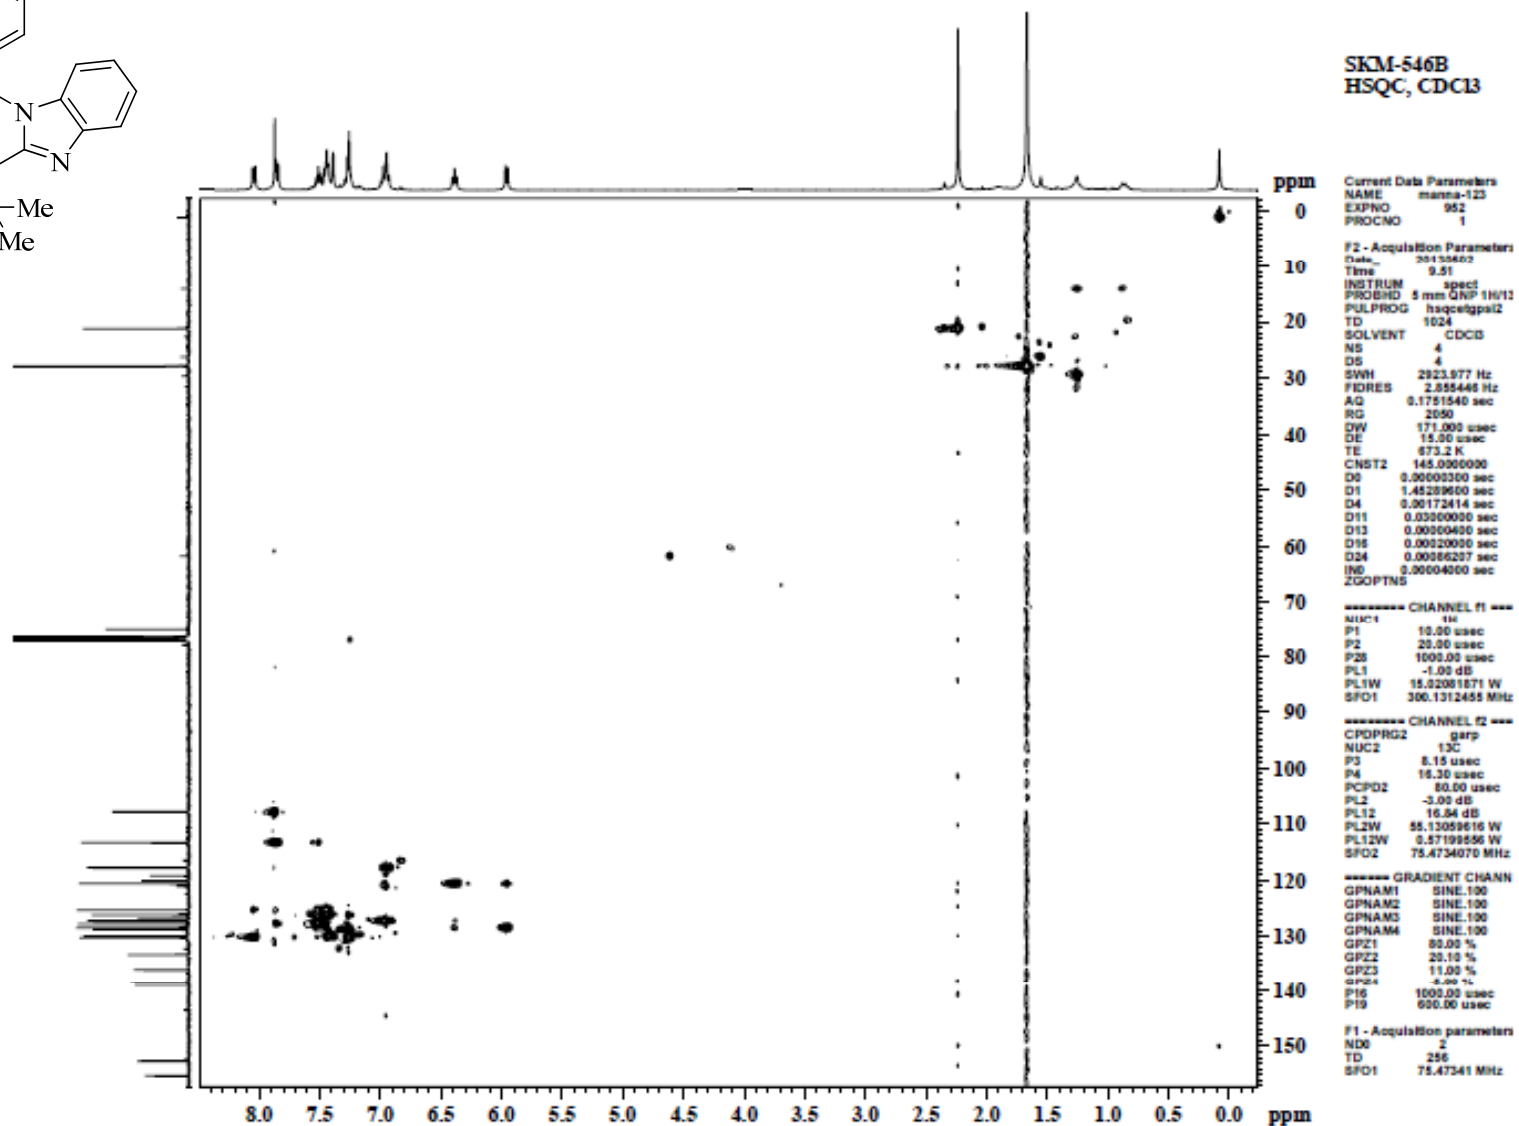

Figure 46: HSQC -Spectrum of **5g**.

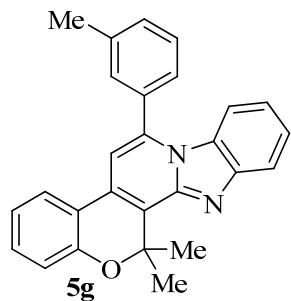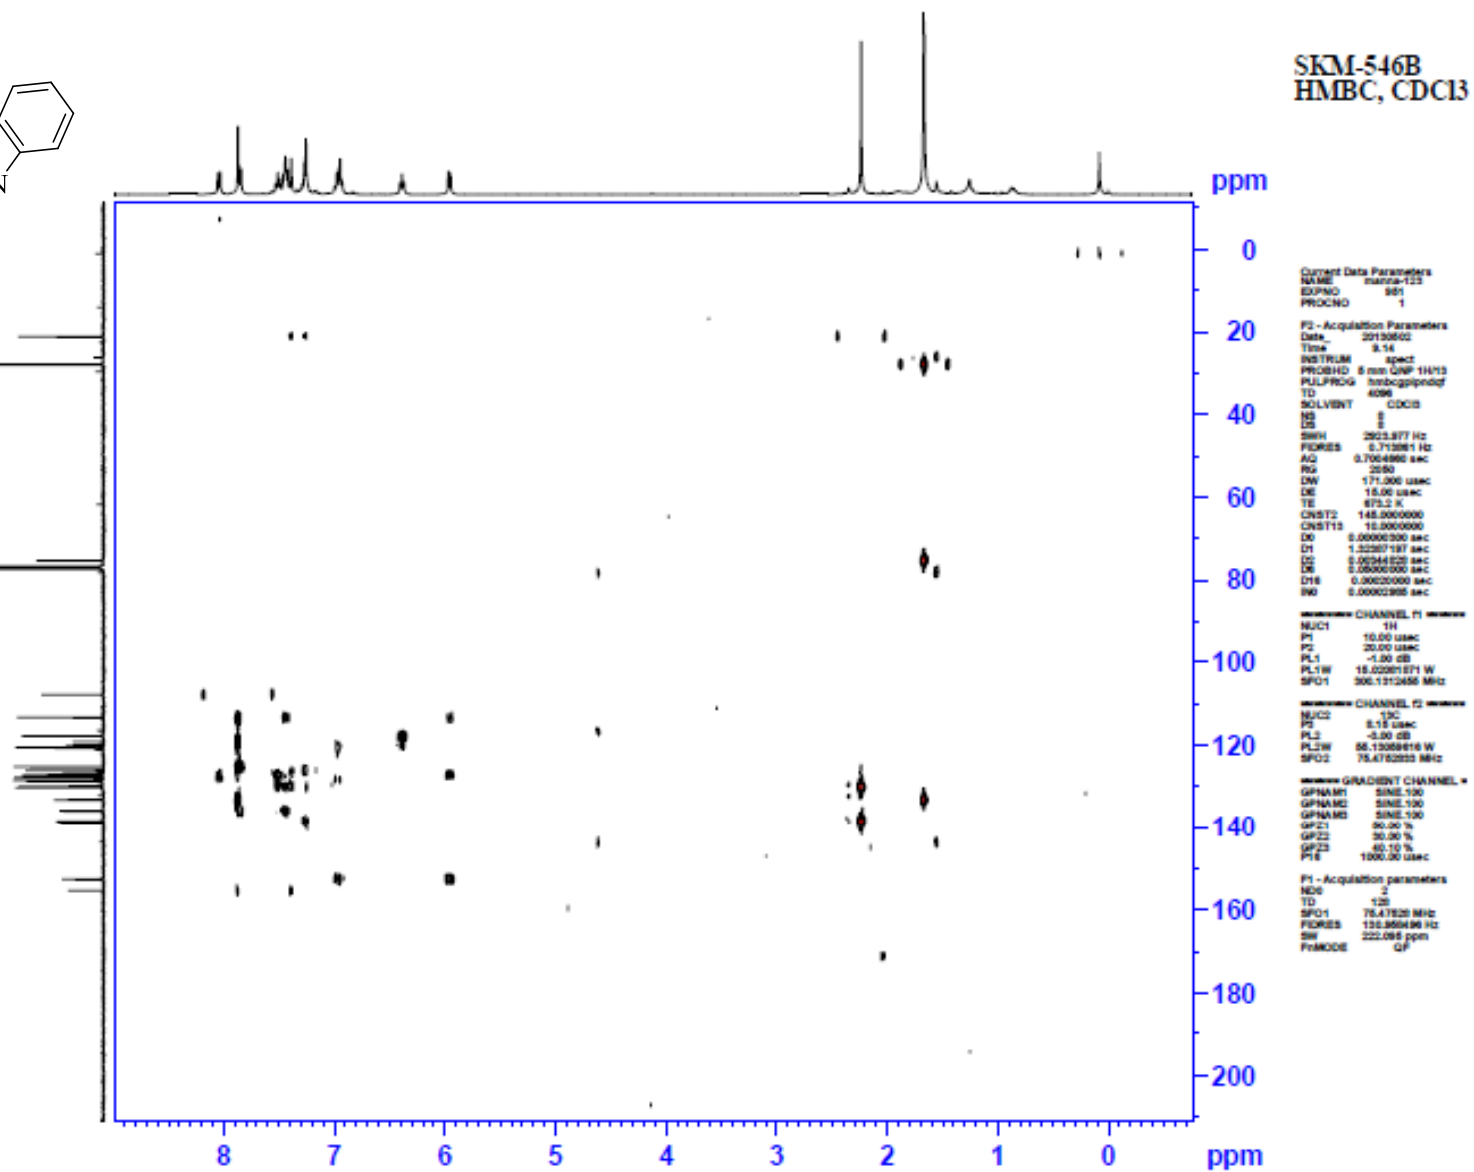

**Figure 47: HMBC -Spectrum of 5g.**

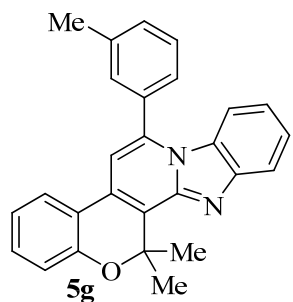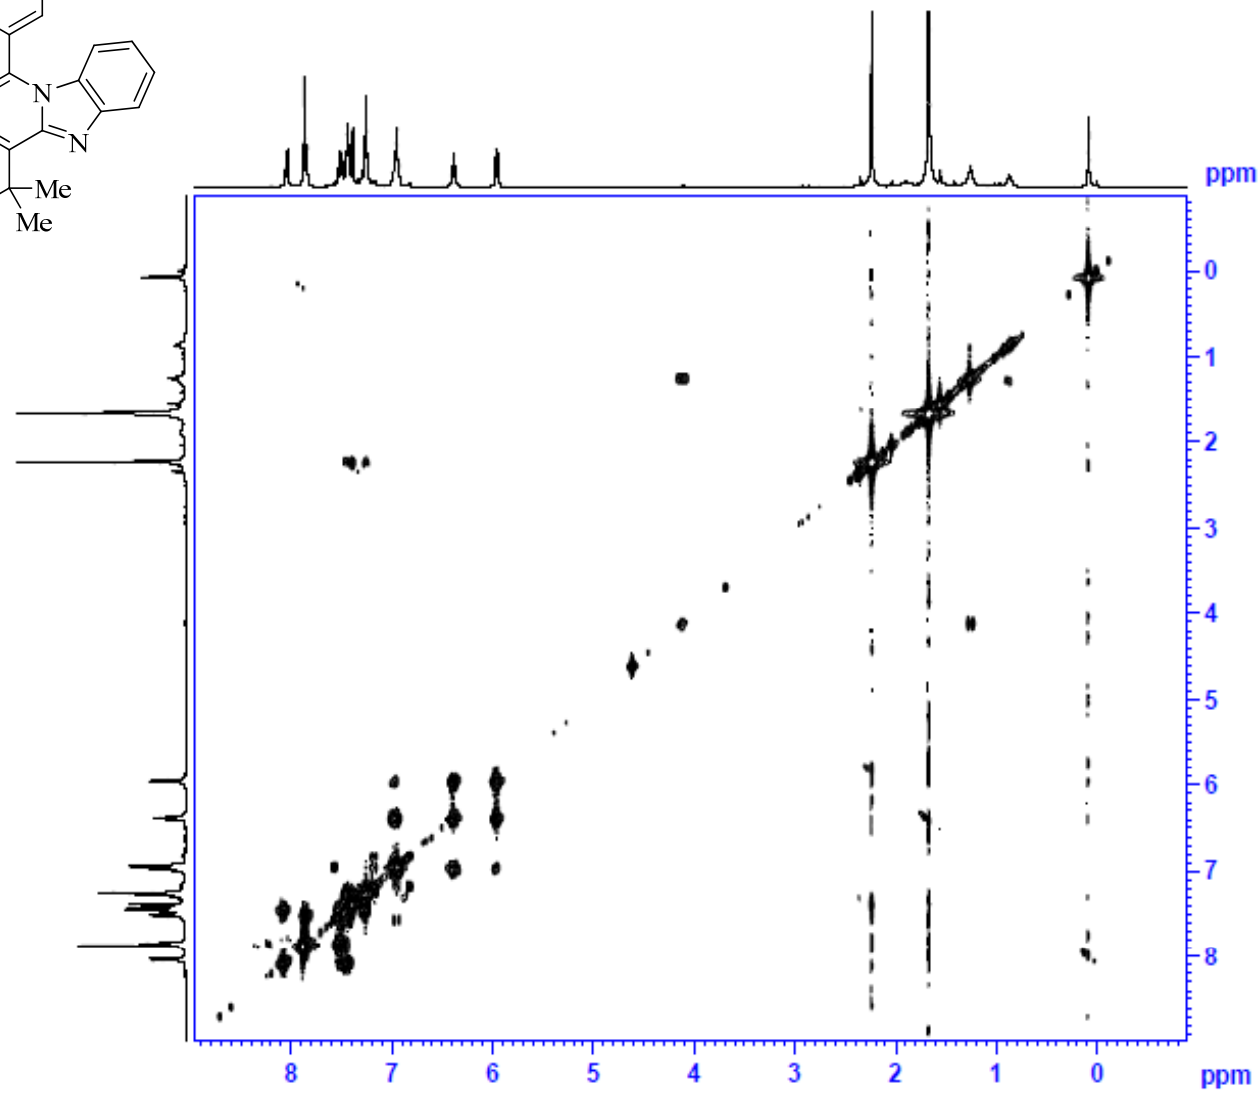

SKM-546B  
CDCl<sub>3</sub>, COSY

Current Data Parameters  
 NAME SKM-546B,COSY,300 MHz,21.5.13.M  
 EXPNO 931  
 PROCNO 1

F1 - Acquisition parameters  
 TD 128  
 SFO1 300.1312 MHz  
 FIDRES 23.113965 Hz  
 SIV 9.888 ppm  
 FxMODE QF

F2 - Processing parameters  
 SI 1024  
 SF 300.1300111 MHz  
 WDW SINE  
 SSB 0  
 LB 0 Hz  
 GB 0  
 PC 1.40

F1 - Processing parameters  
 SI 1024  
 MC2 QF  
 SF 300.1300050 MHz  
 WDW SINE  
 SSB 0  
 LB 0 Hz  
 GB 0

Figure 48: COSY -Spectrum of 5g.

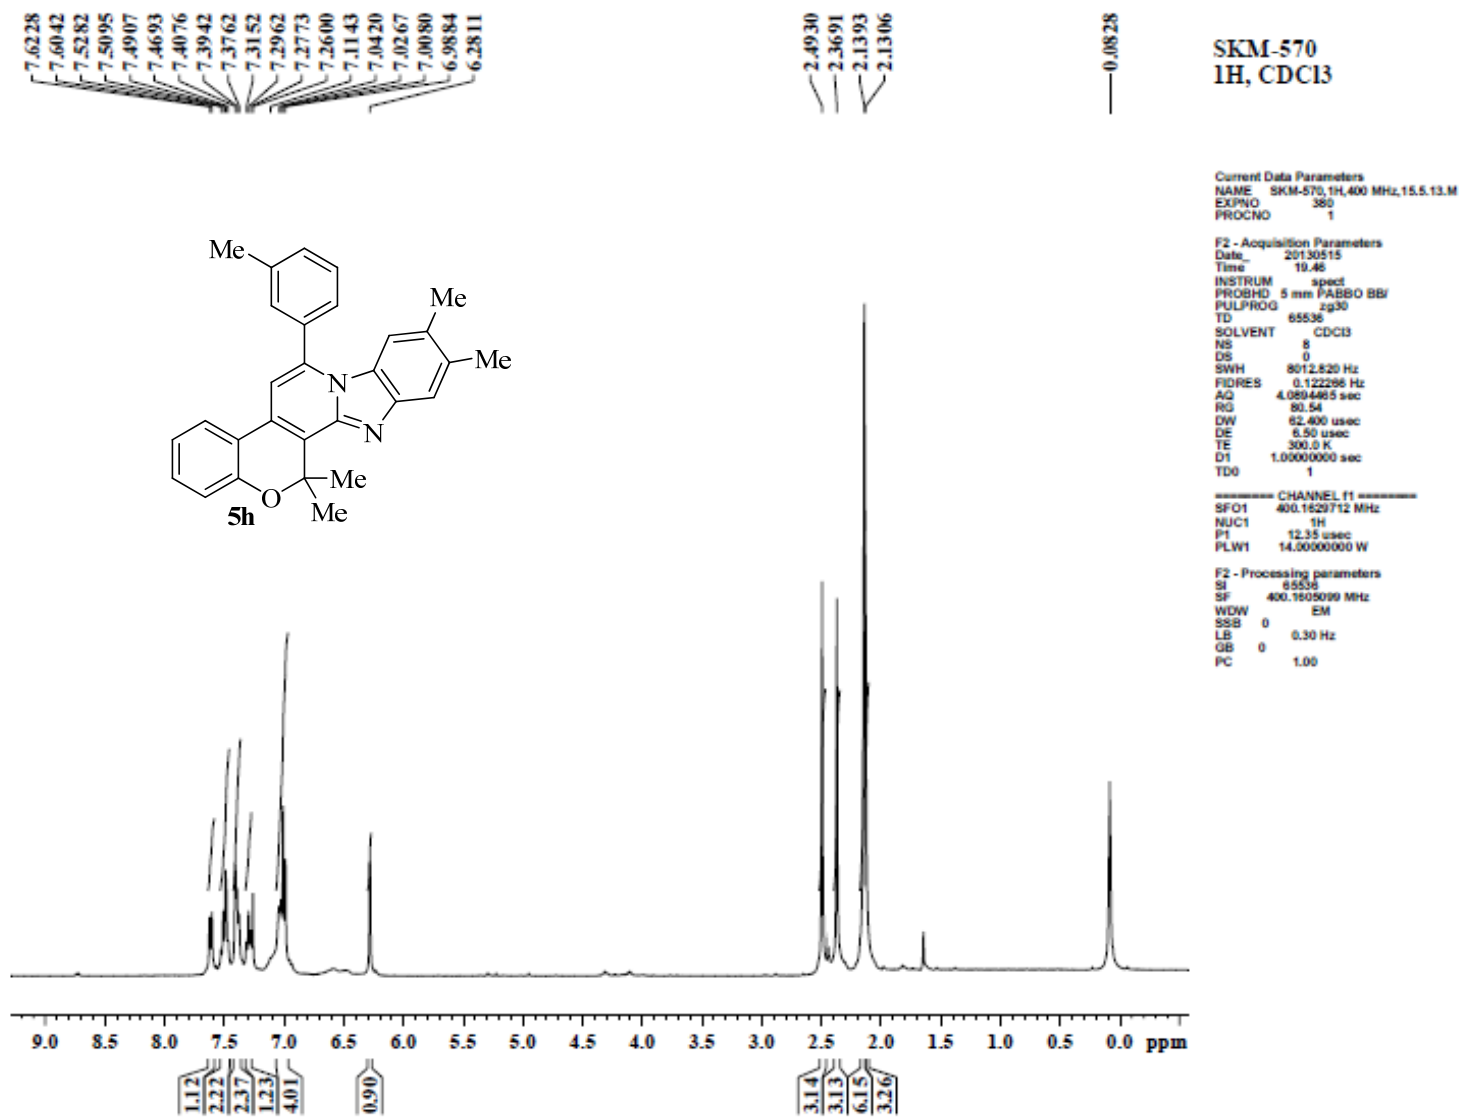

**Figure 49:** <sup>1</sup>H -NMR Spectrum of **5h**.

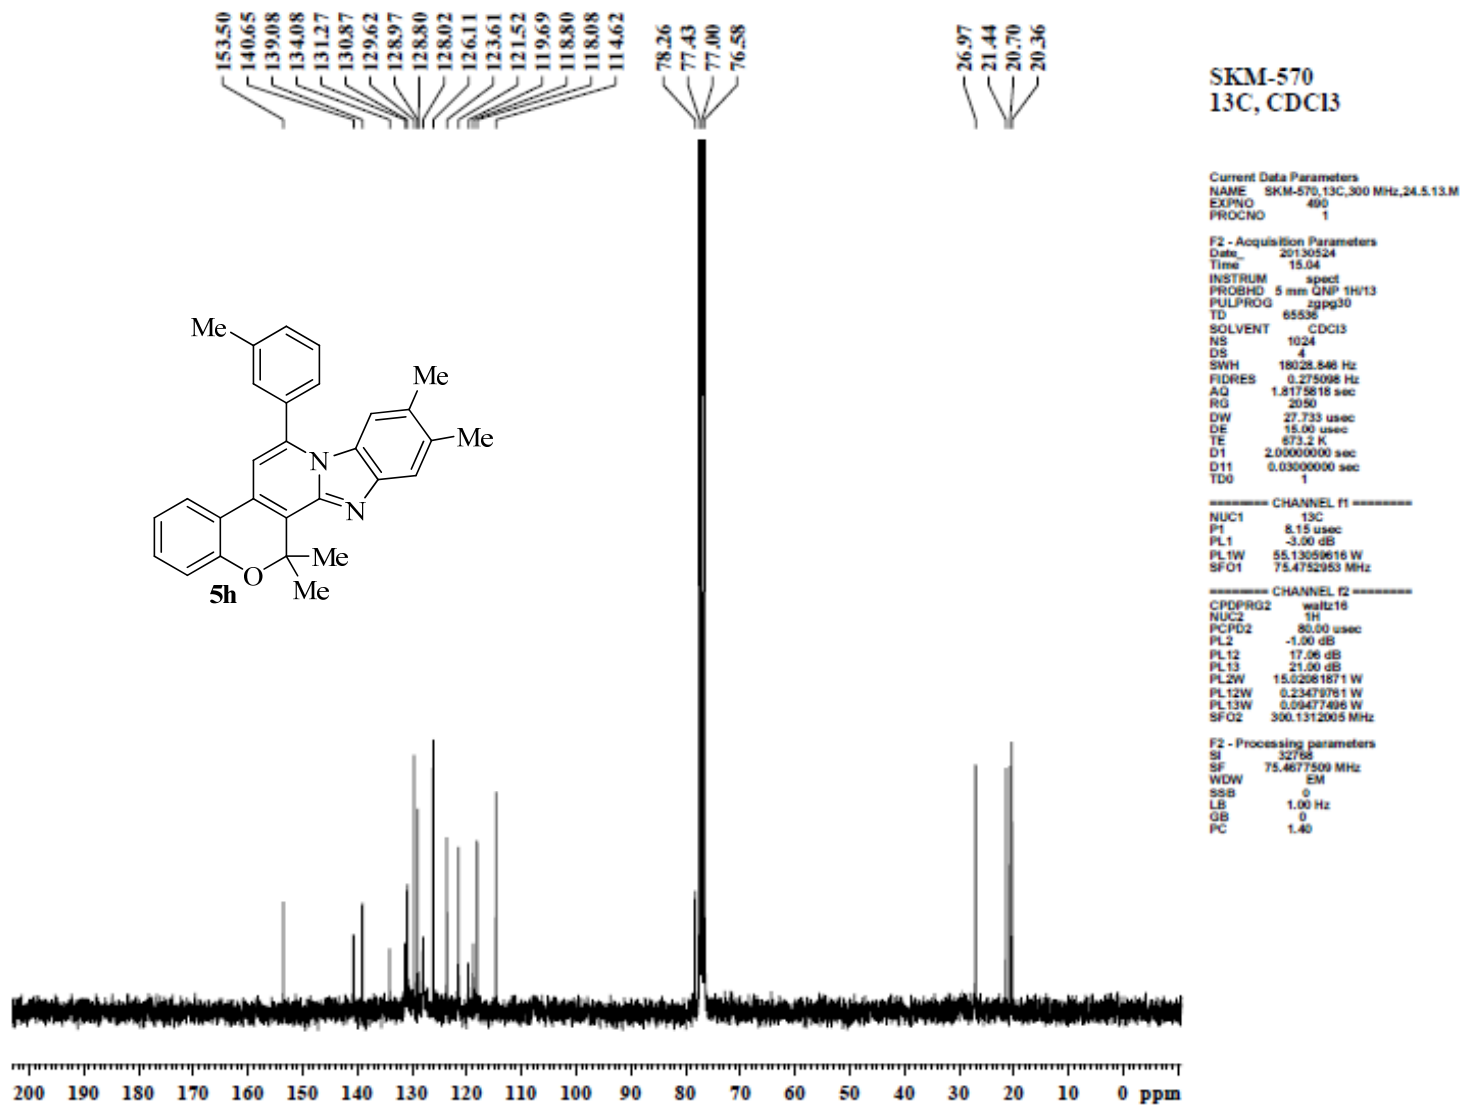

**Figure 50:**  $^{13}\text{C}$  -NMR Spectrum of **5h**.



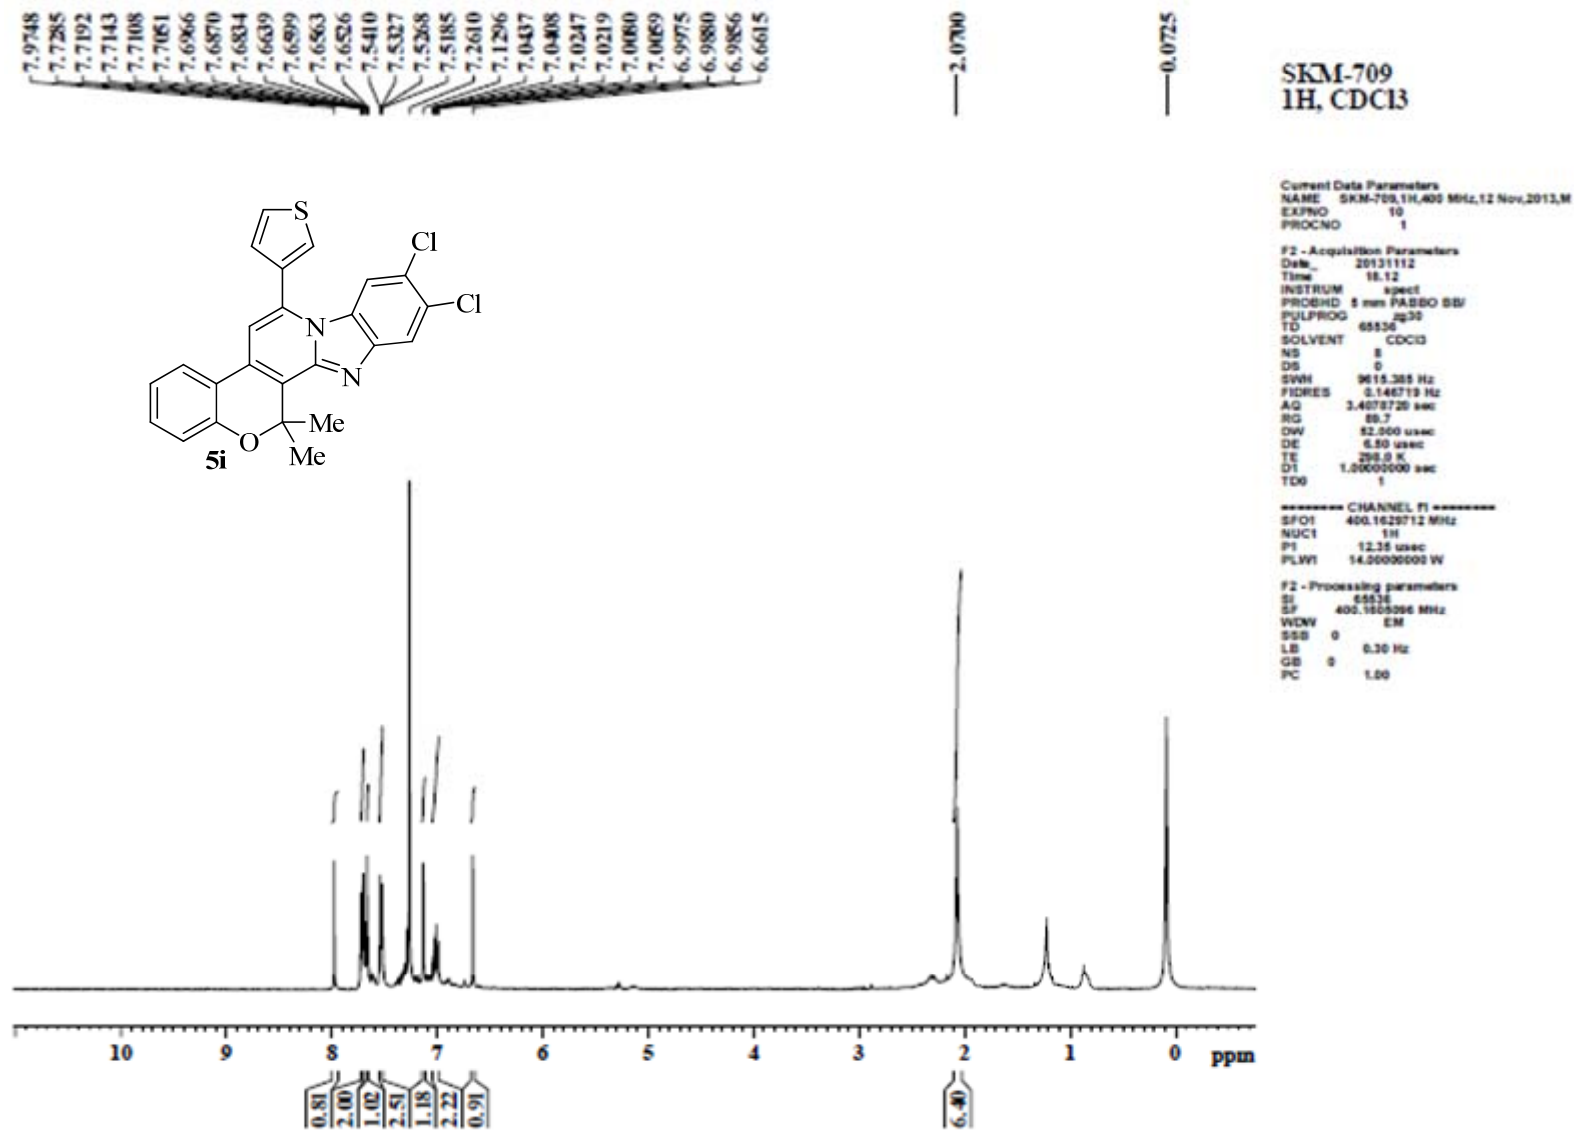

**Figure 51:** <sup>1</sup>H -NMR Spectrum of **5i**.

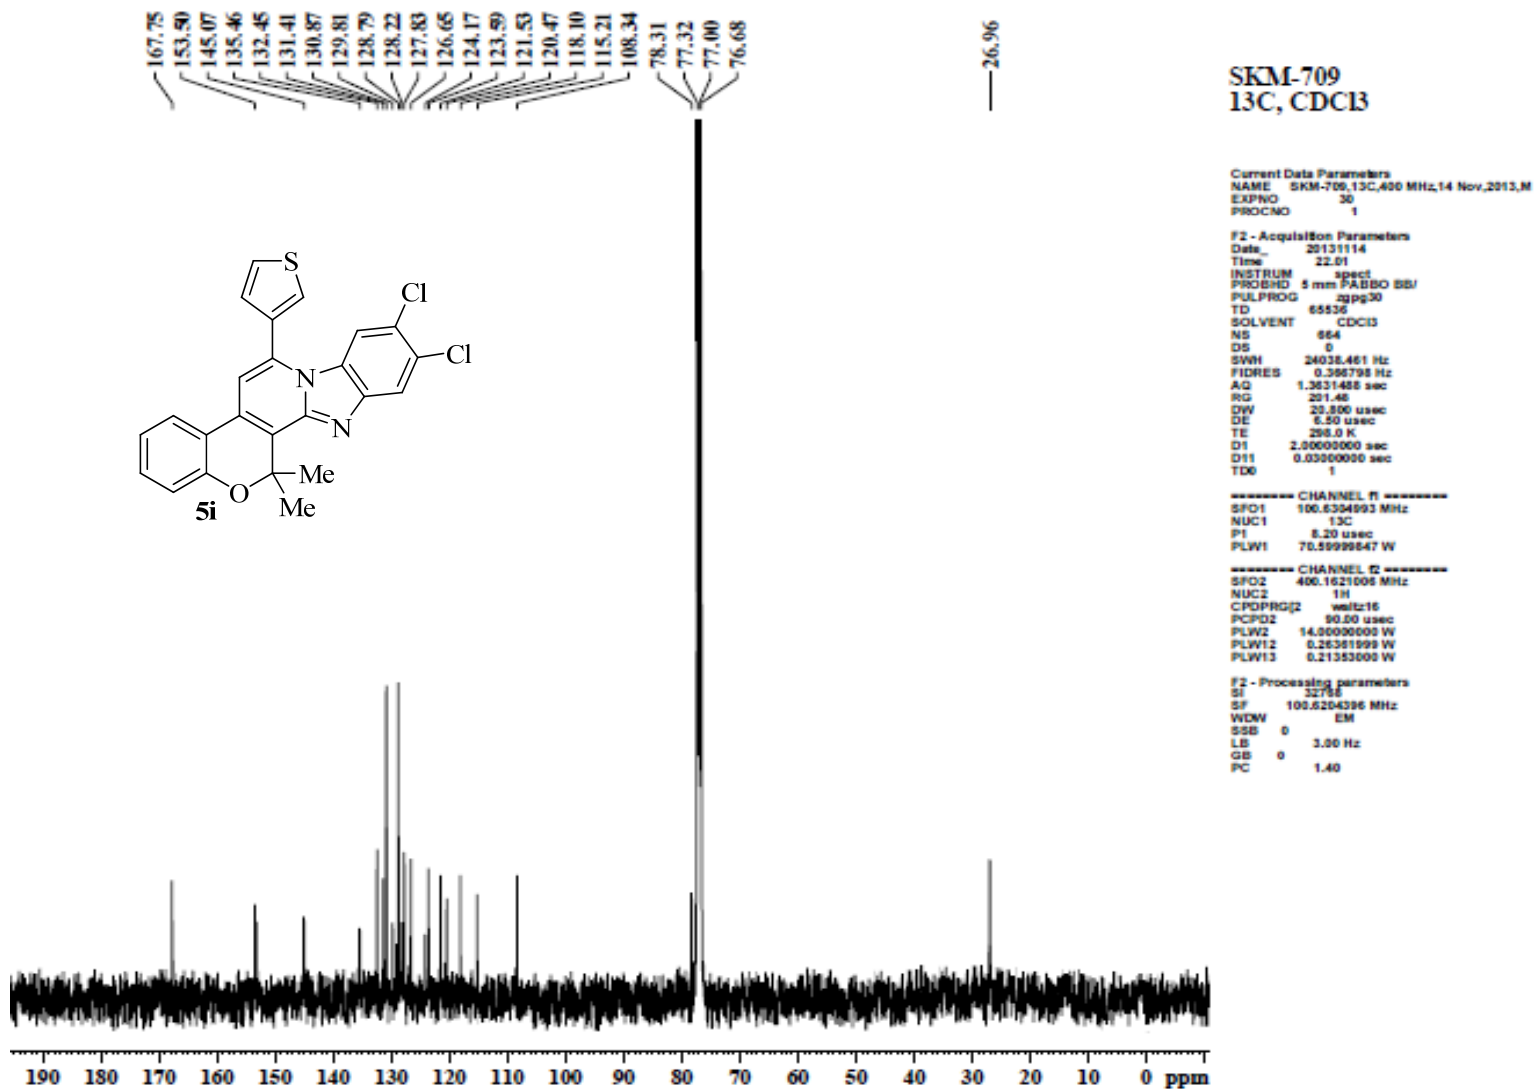

**Figure 52:**  $^{13}\text{C}$  -NMR Spectrum of **5i**.

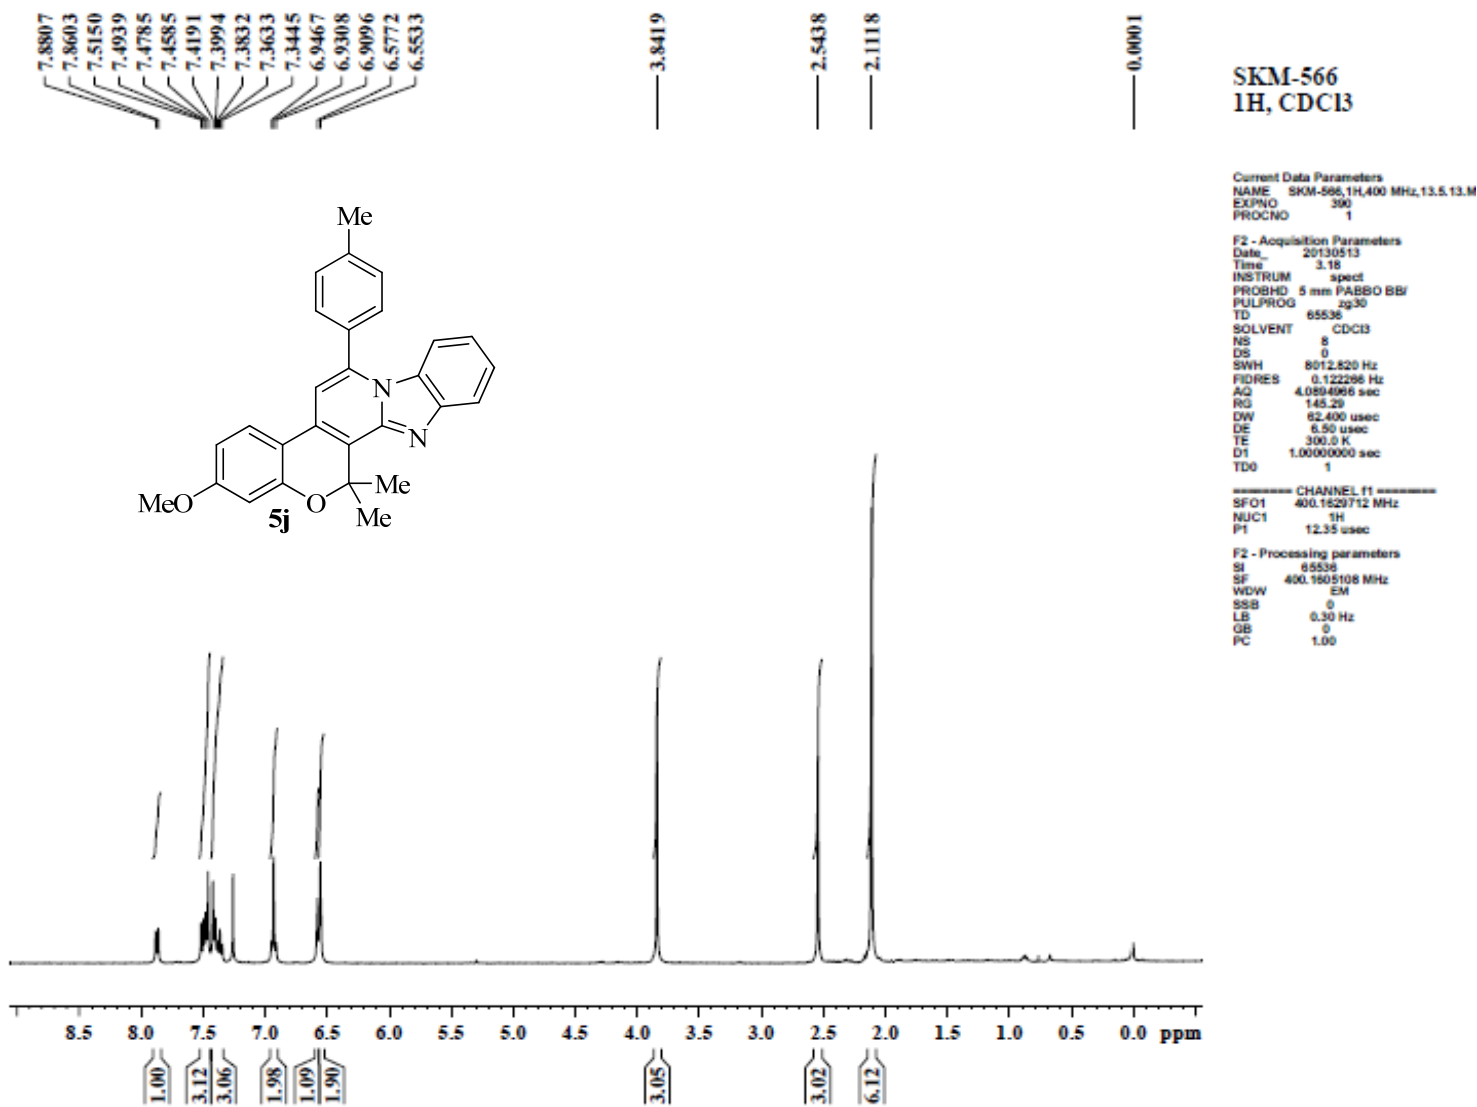

**Figure 53:** <sup>1</sup>H -NMR Spectrum of **5j**.

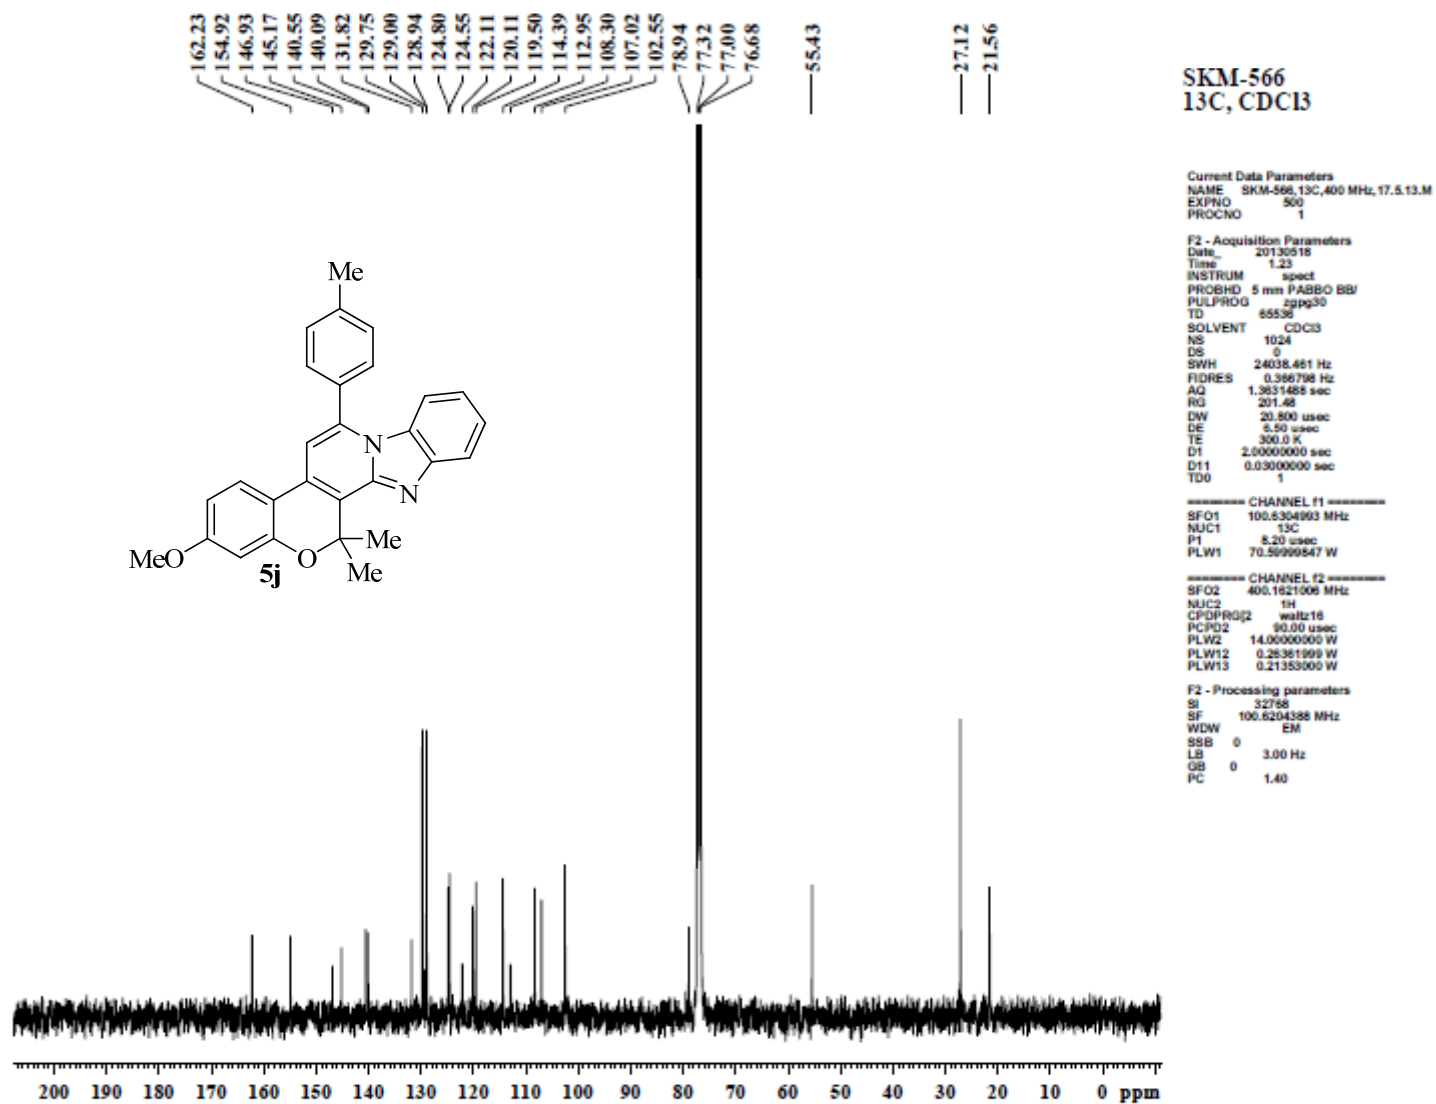

**Figure 54:**  $^{13}\text{C}$  -NMR Spectrum of **5j**.

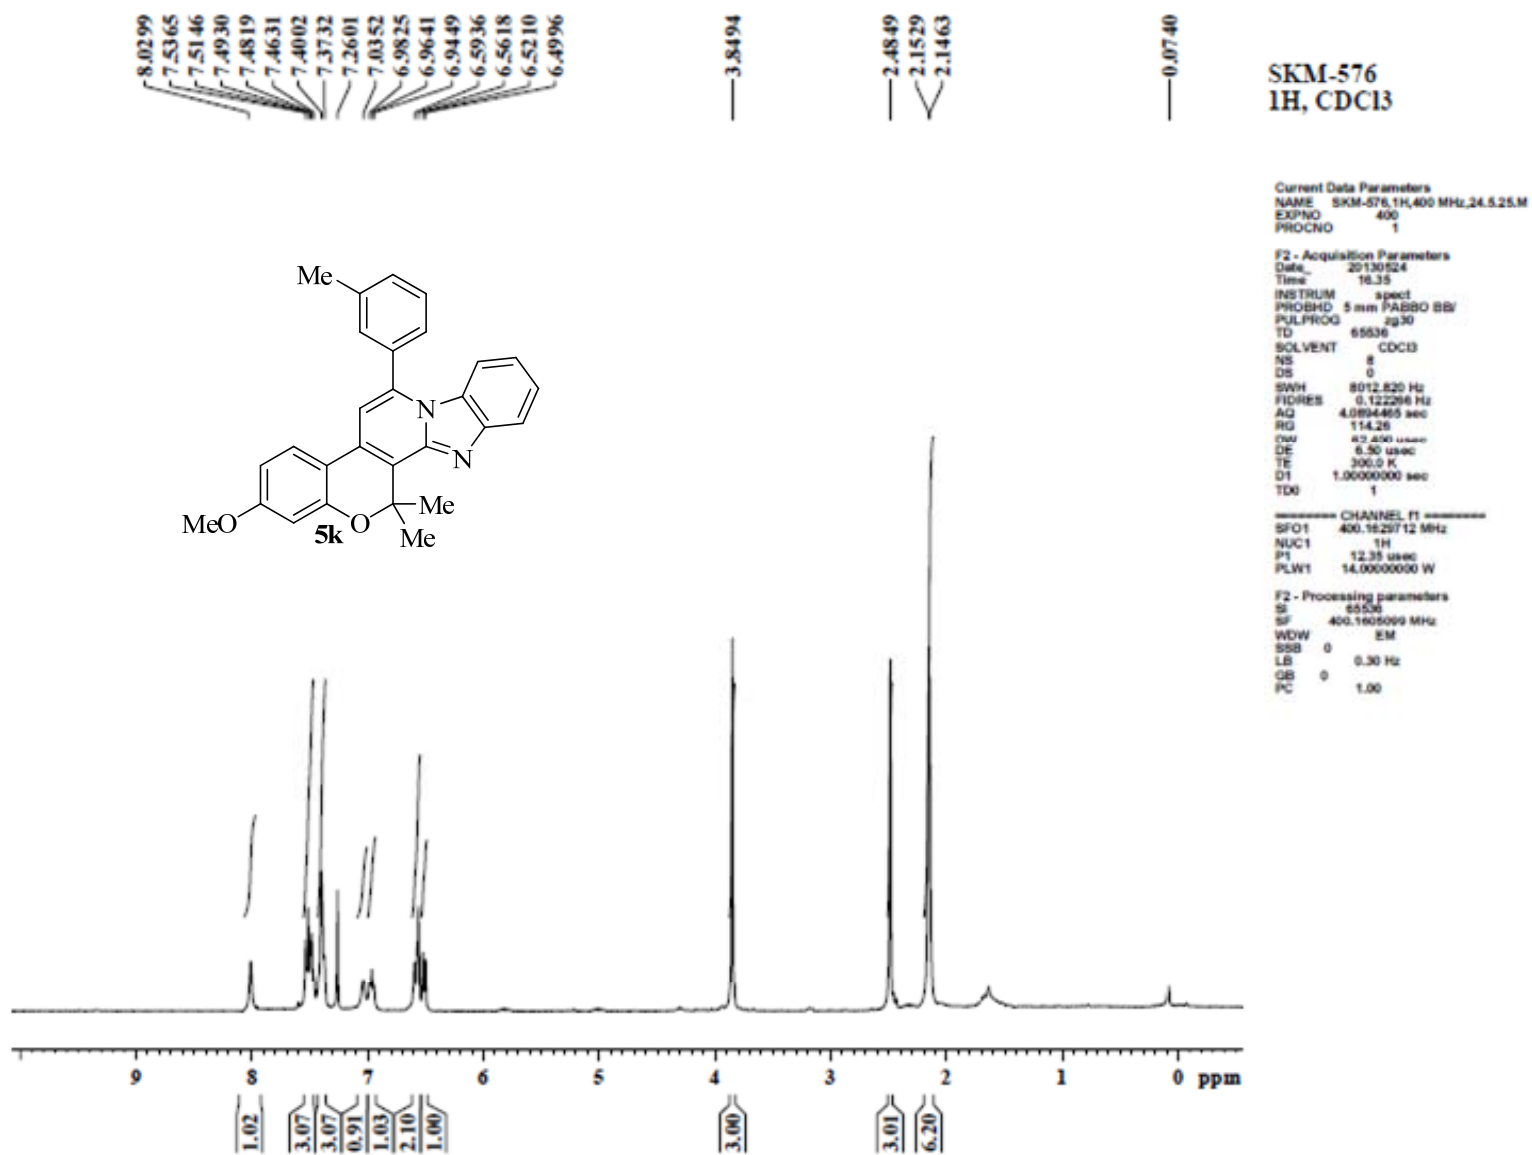

**Figure 55:** <sup>1</sup>H -NMR Spectrum of **5k**.

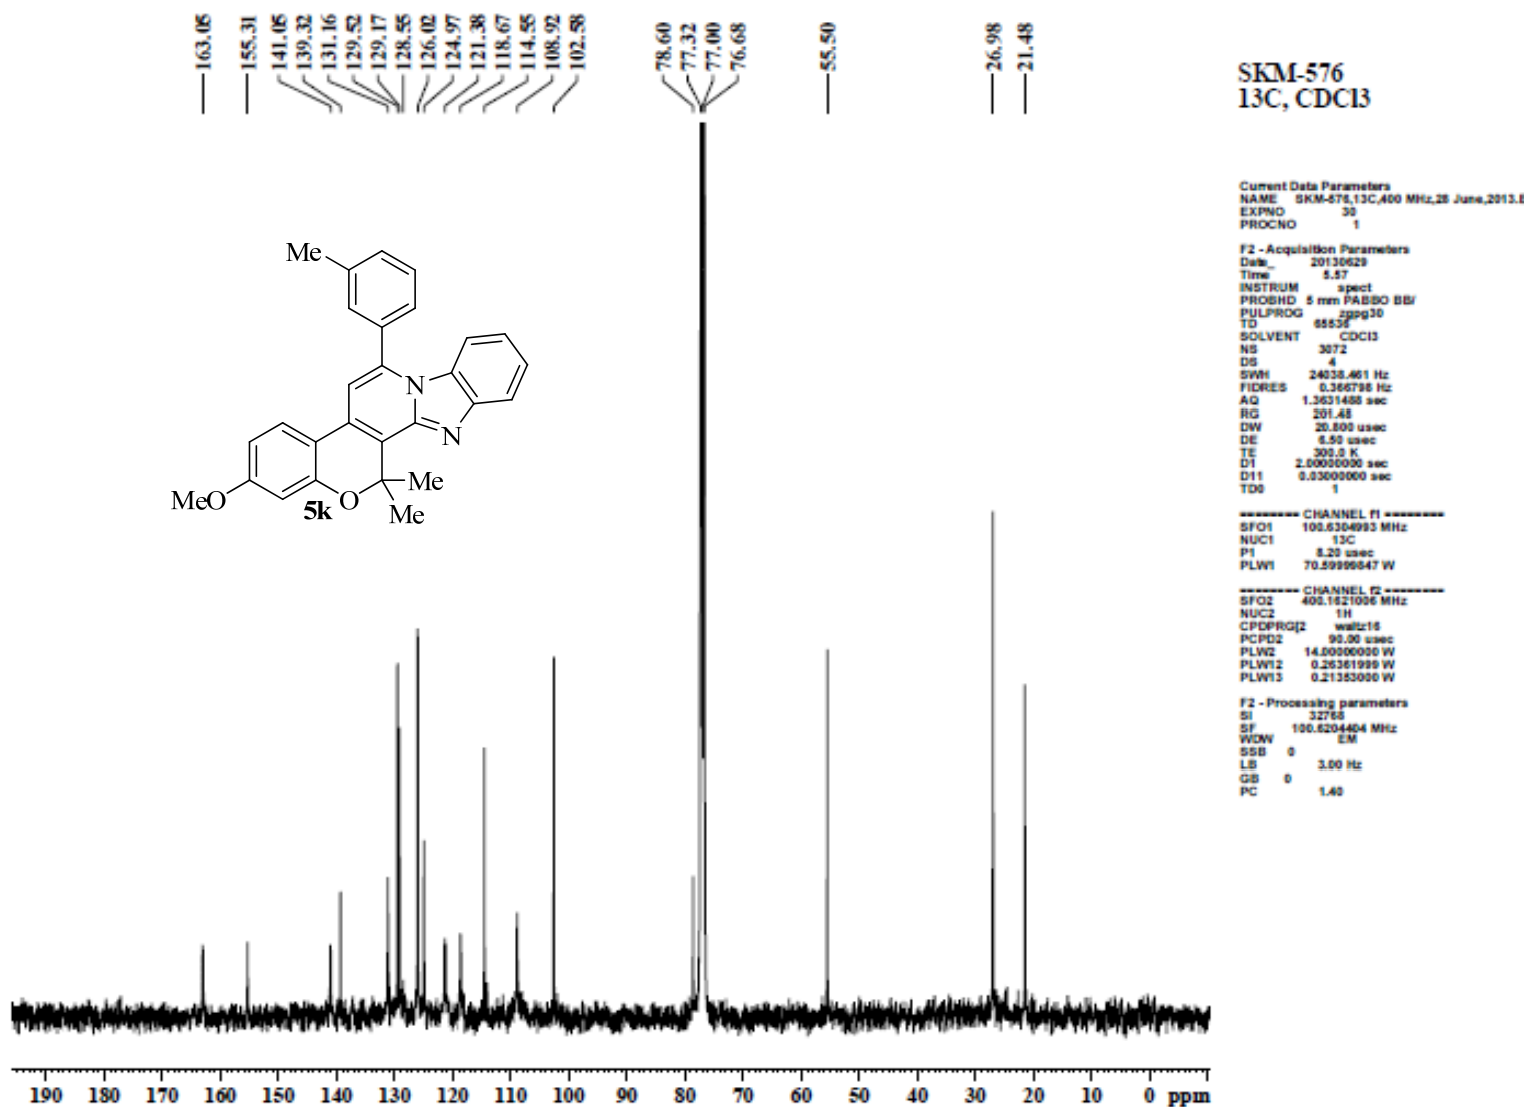

**Figure 56:**  $^{13}\text{C}$  -NMR Spectrum of **5k**.

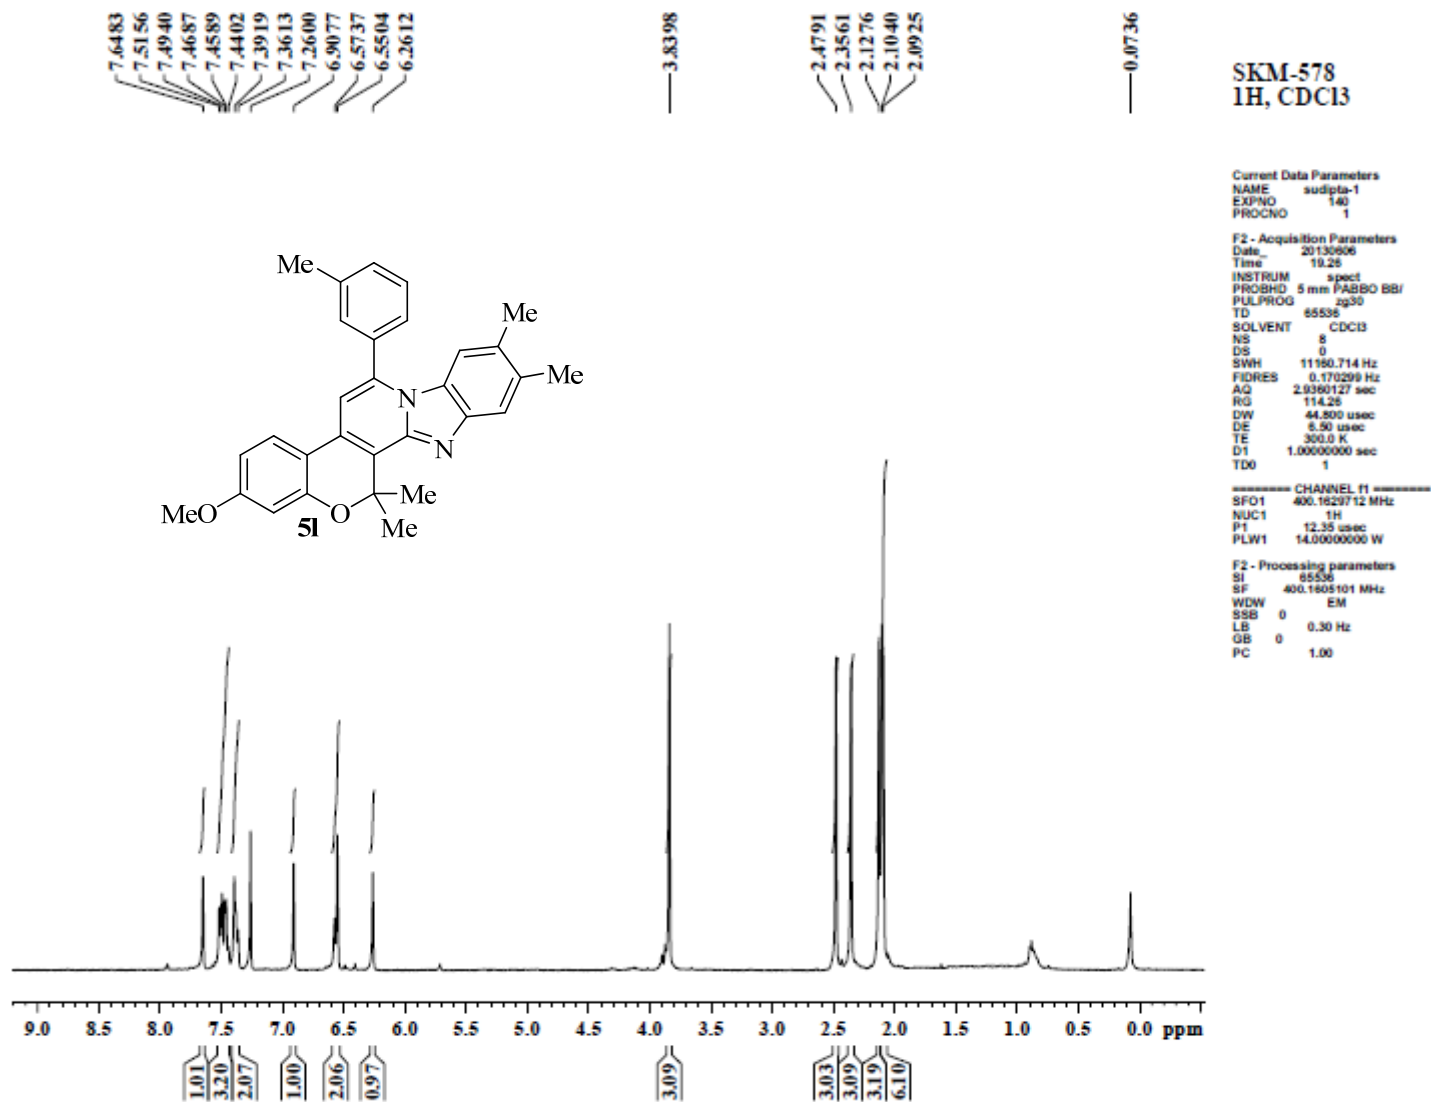

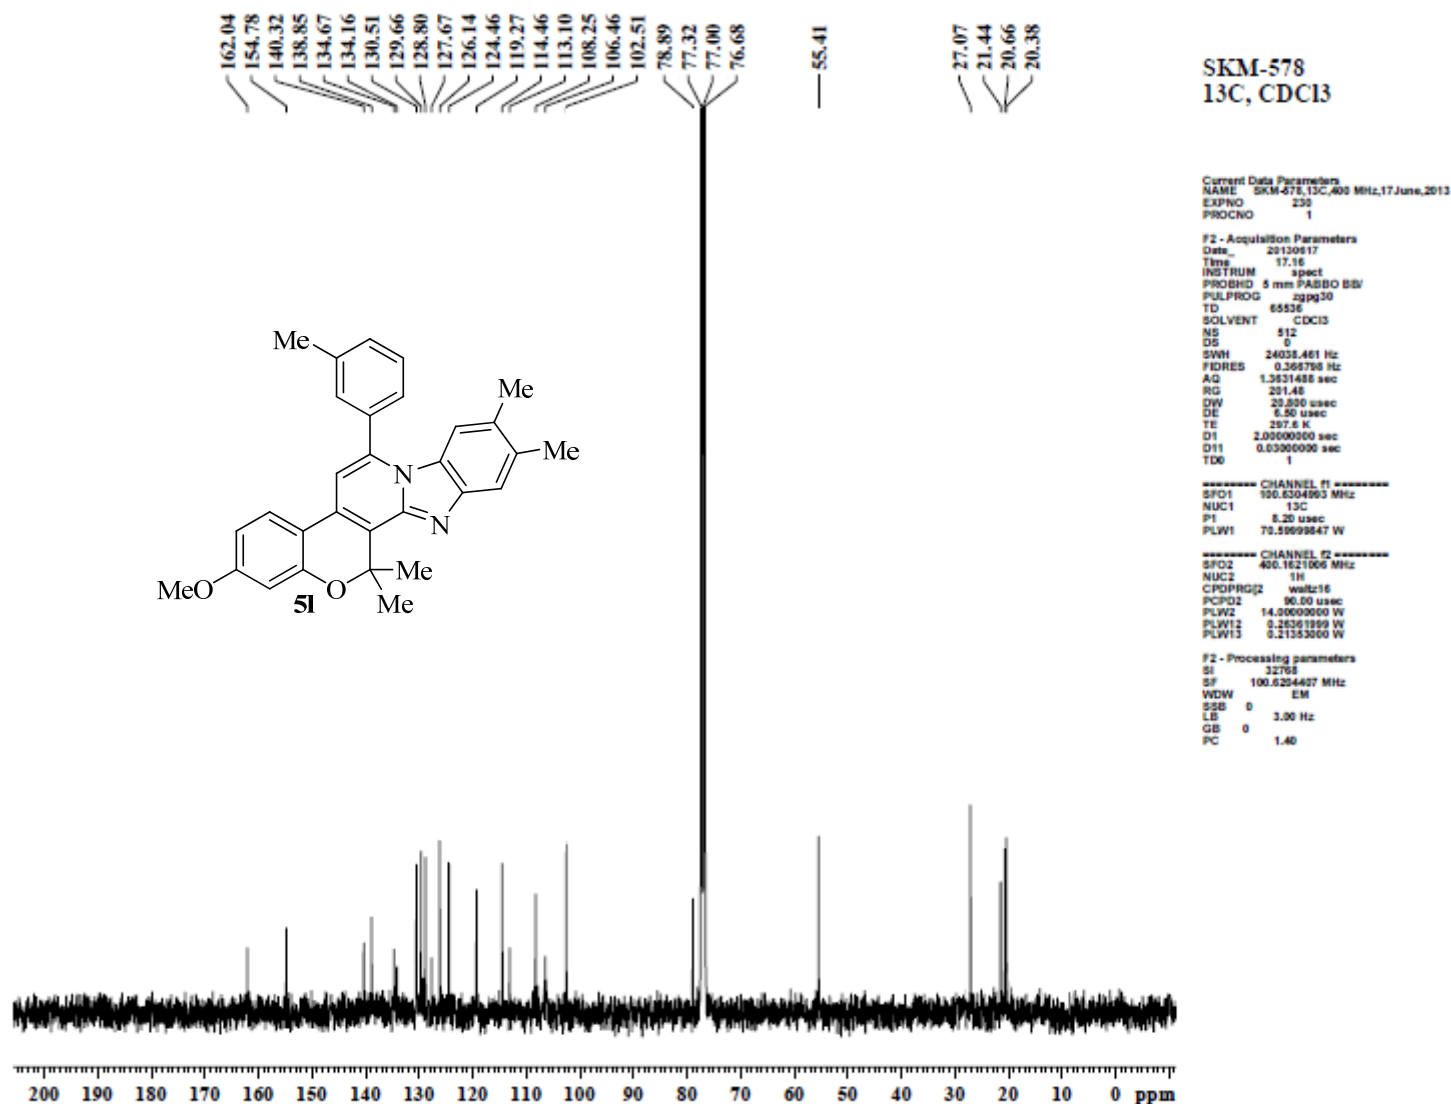

Figure 58:  $^{13}\text{C}$  -NMR Spectrum of 5l.



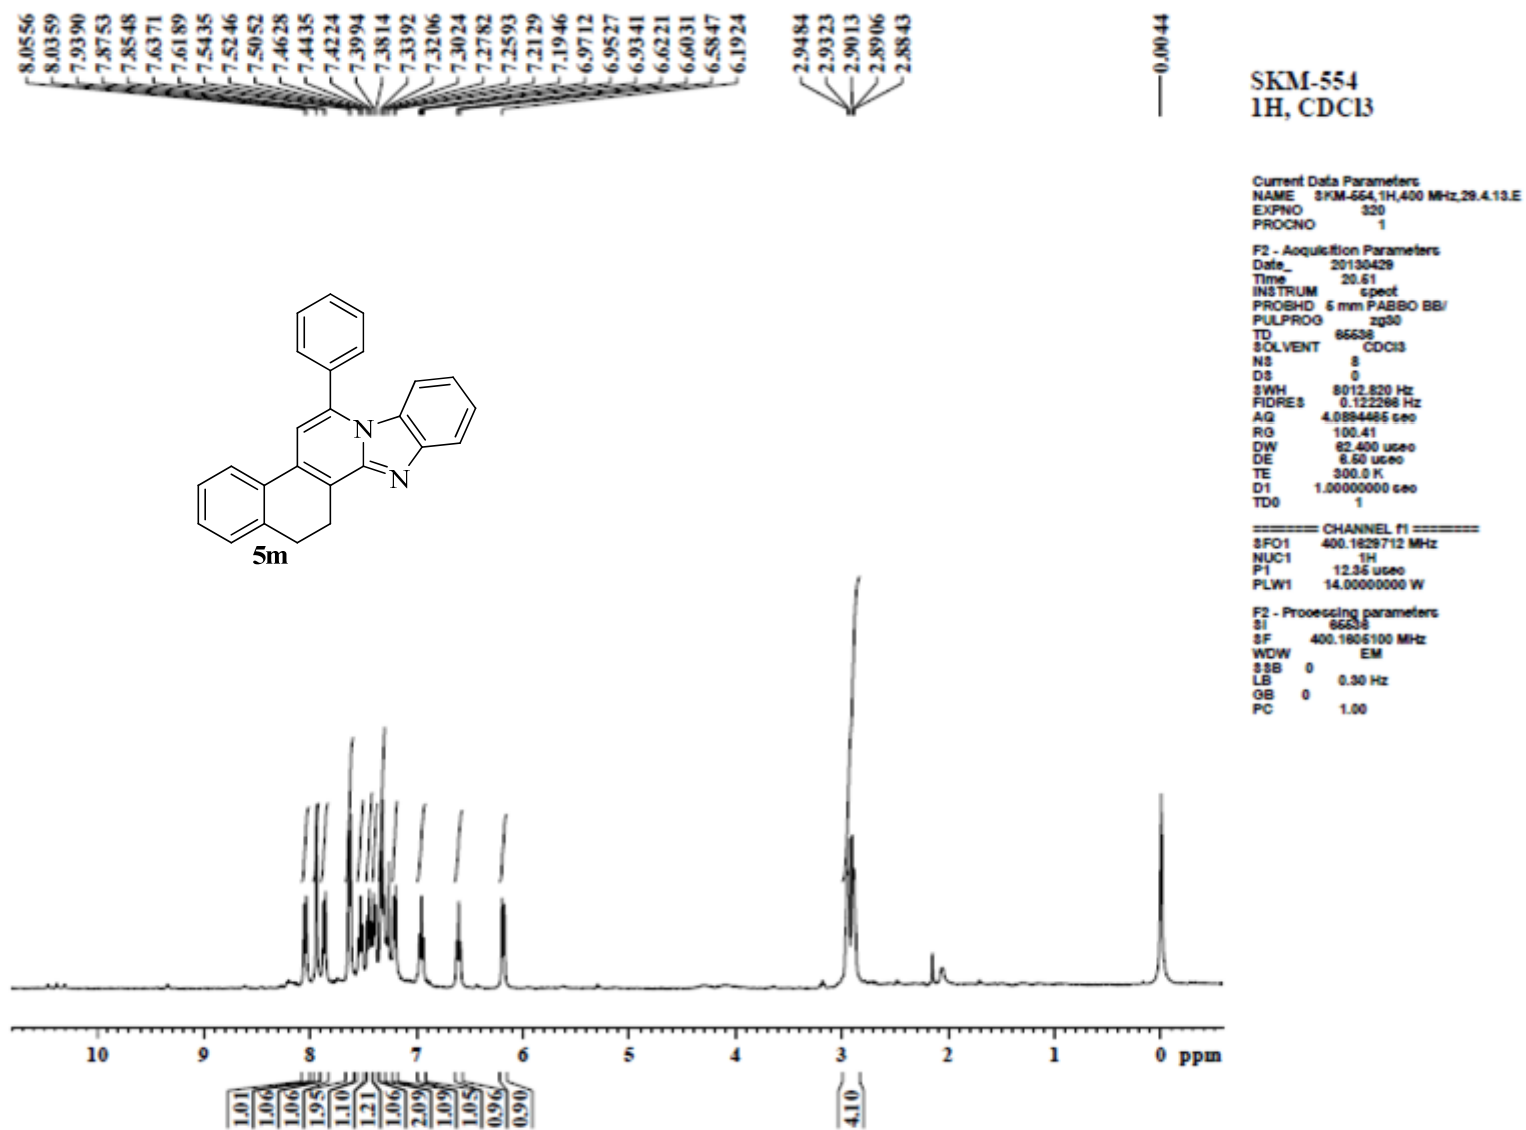

**Figure 59:**  $^1\text{H}$ -NMR Spectrum of **5m**.

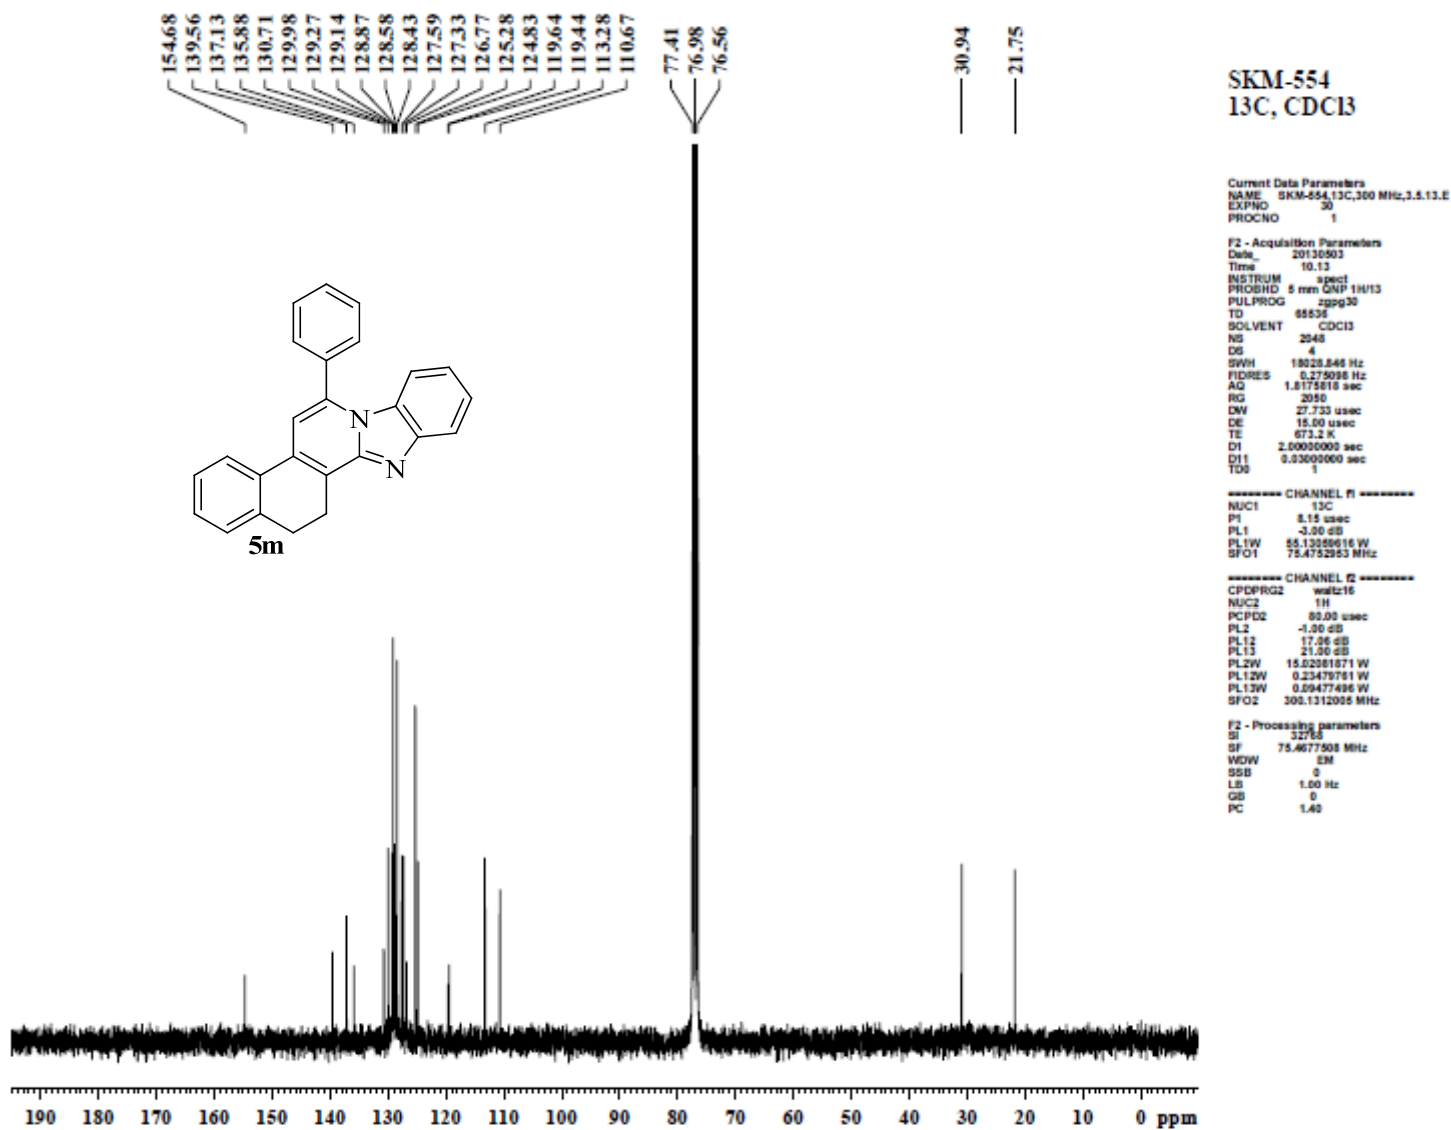

**Figure 60:** <sup>13</sup>C -NMR Spectrum of **5m**.

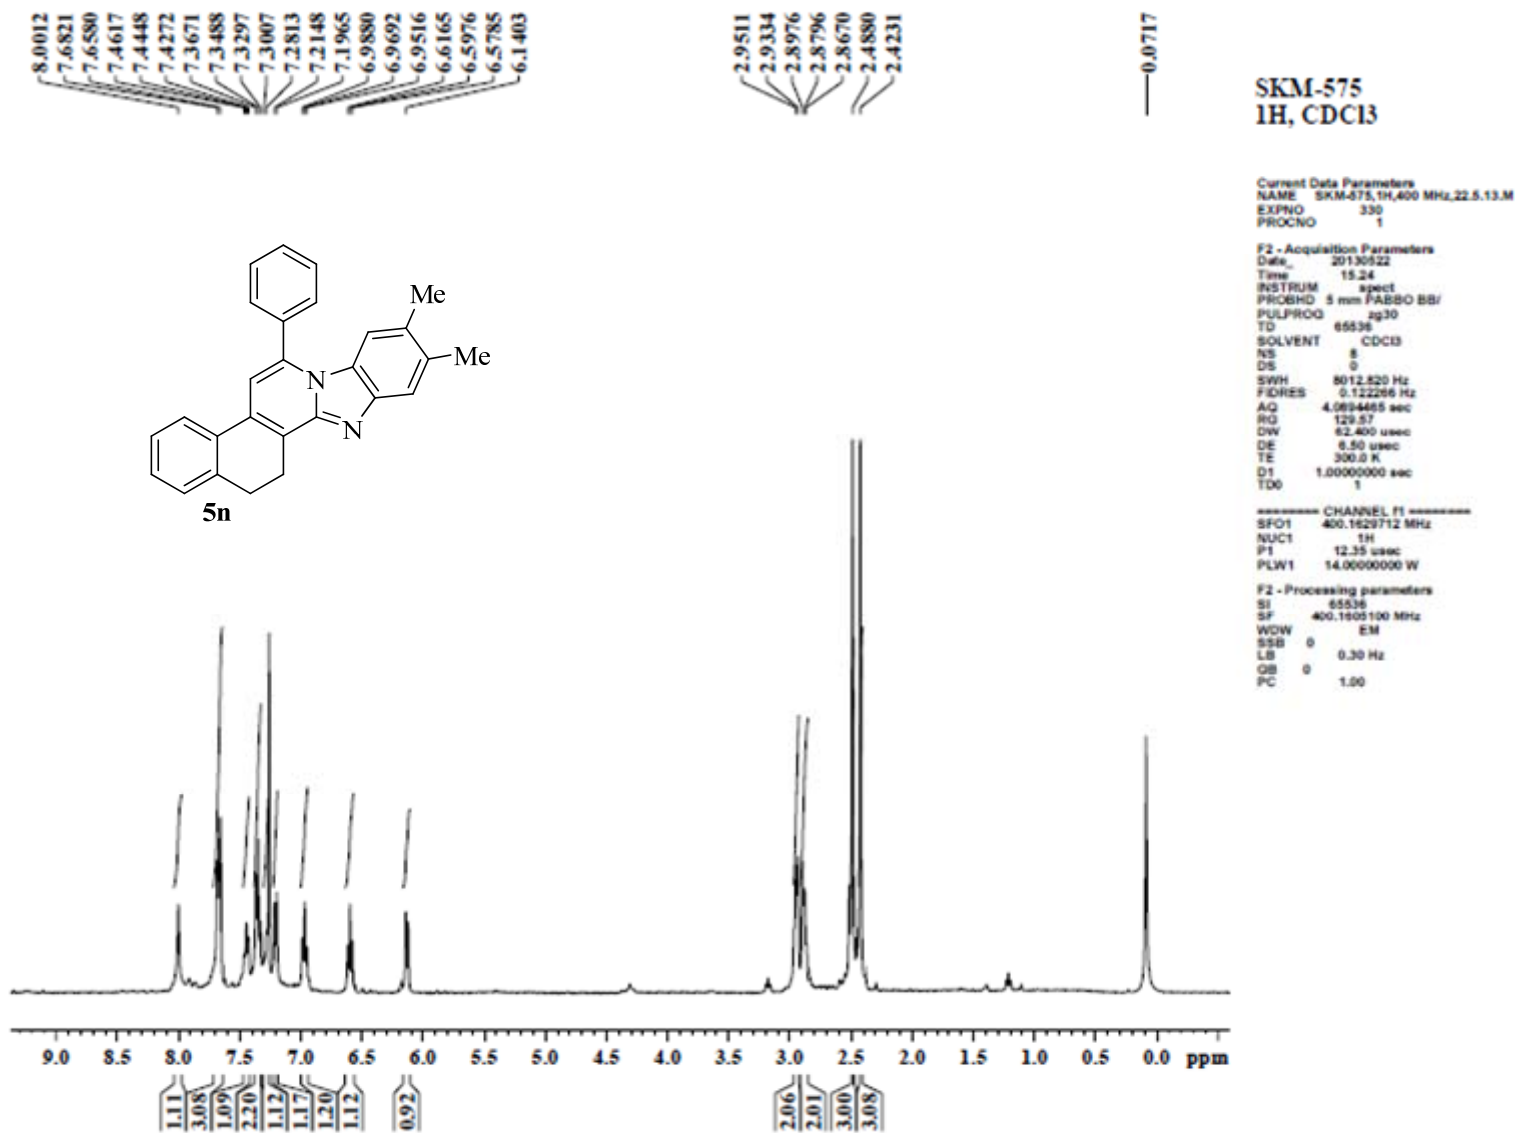

**Figure 61:**  $^1\text{H}$ -NMR Spectrum of **5n**.

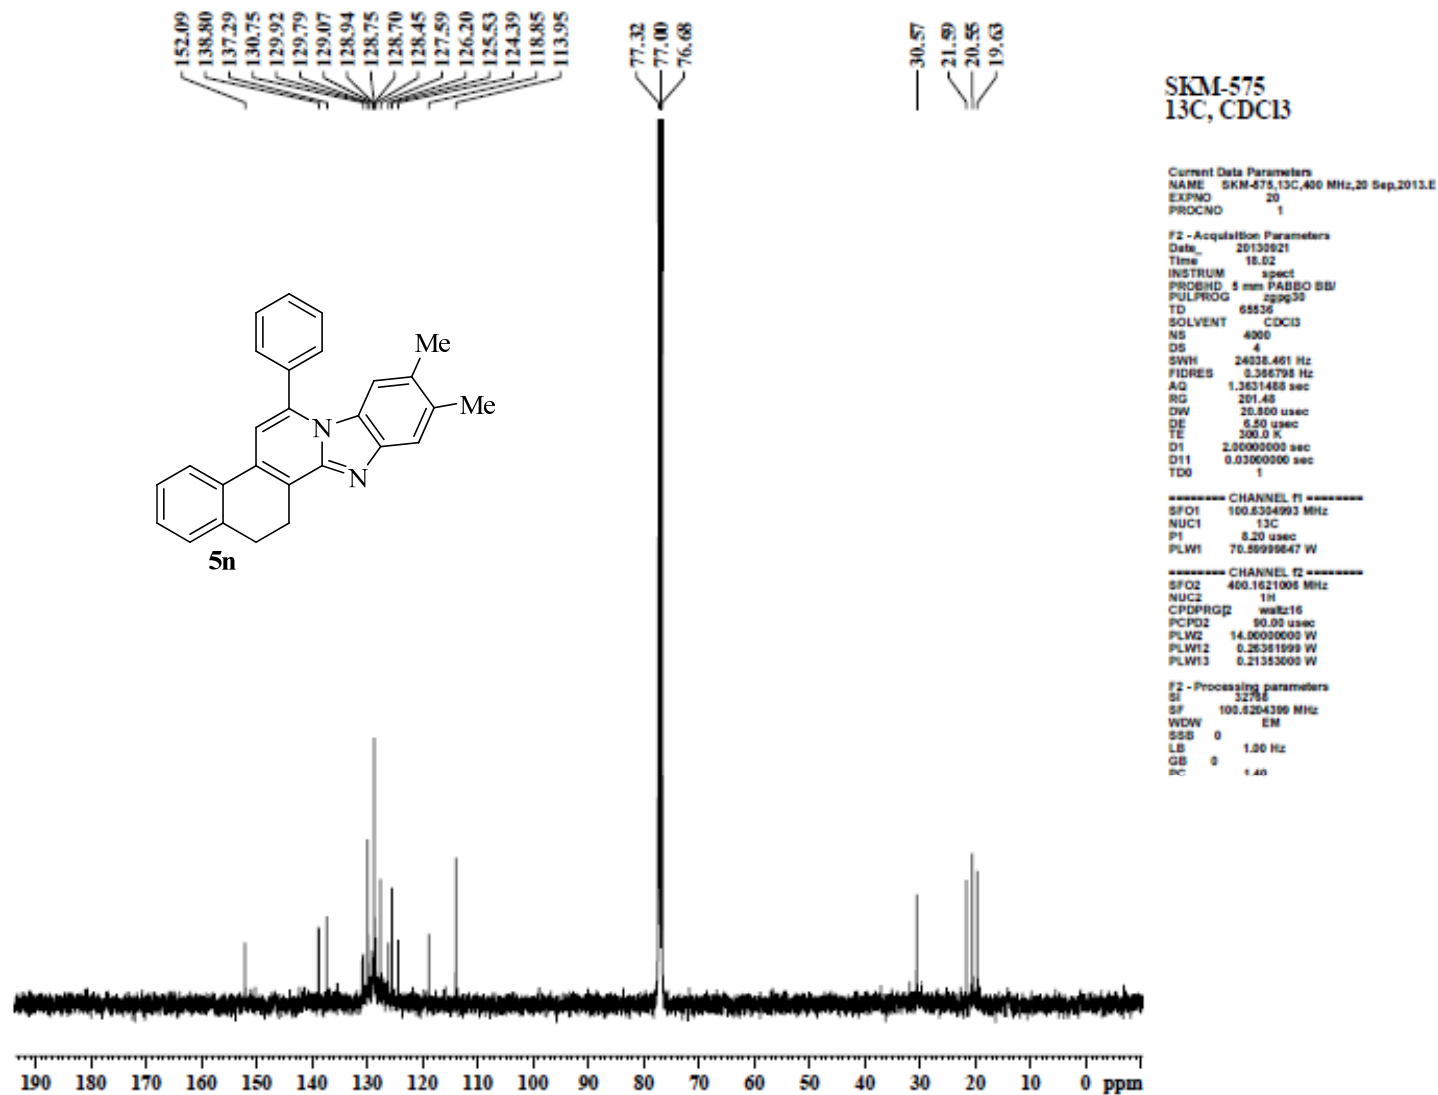

**Figure 62:**  $^{13}\text{C}$  -NMR Spectrum of **5n**.

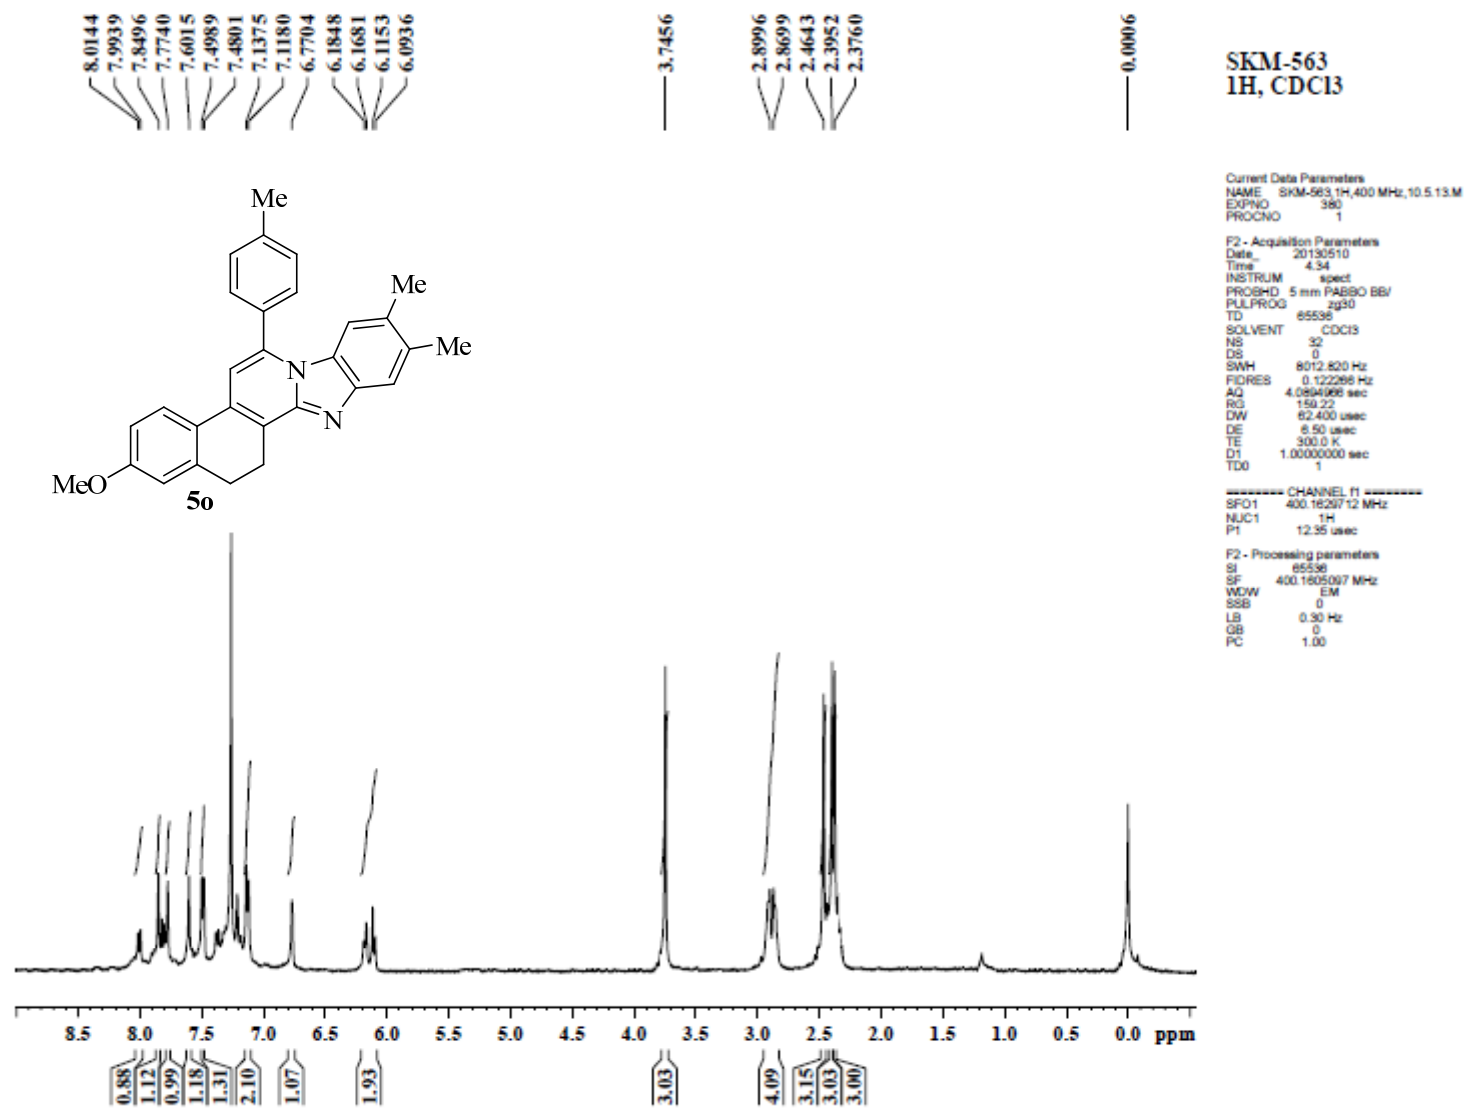

**Figure 63:**  $^1\text{H}$ -NMR Spectrum of **5o**.

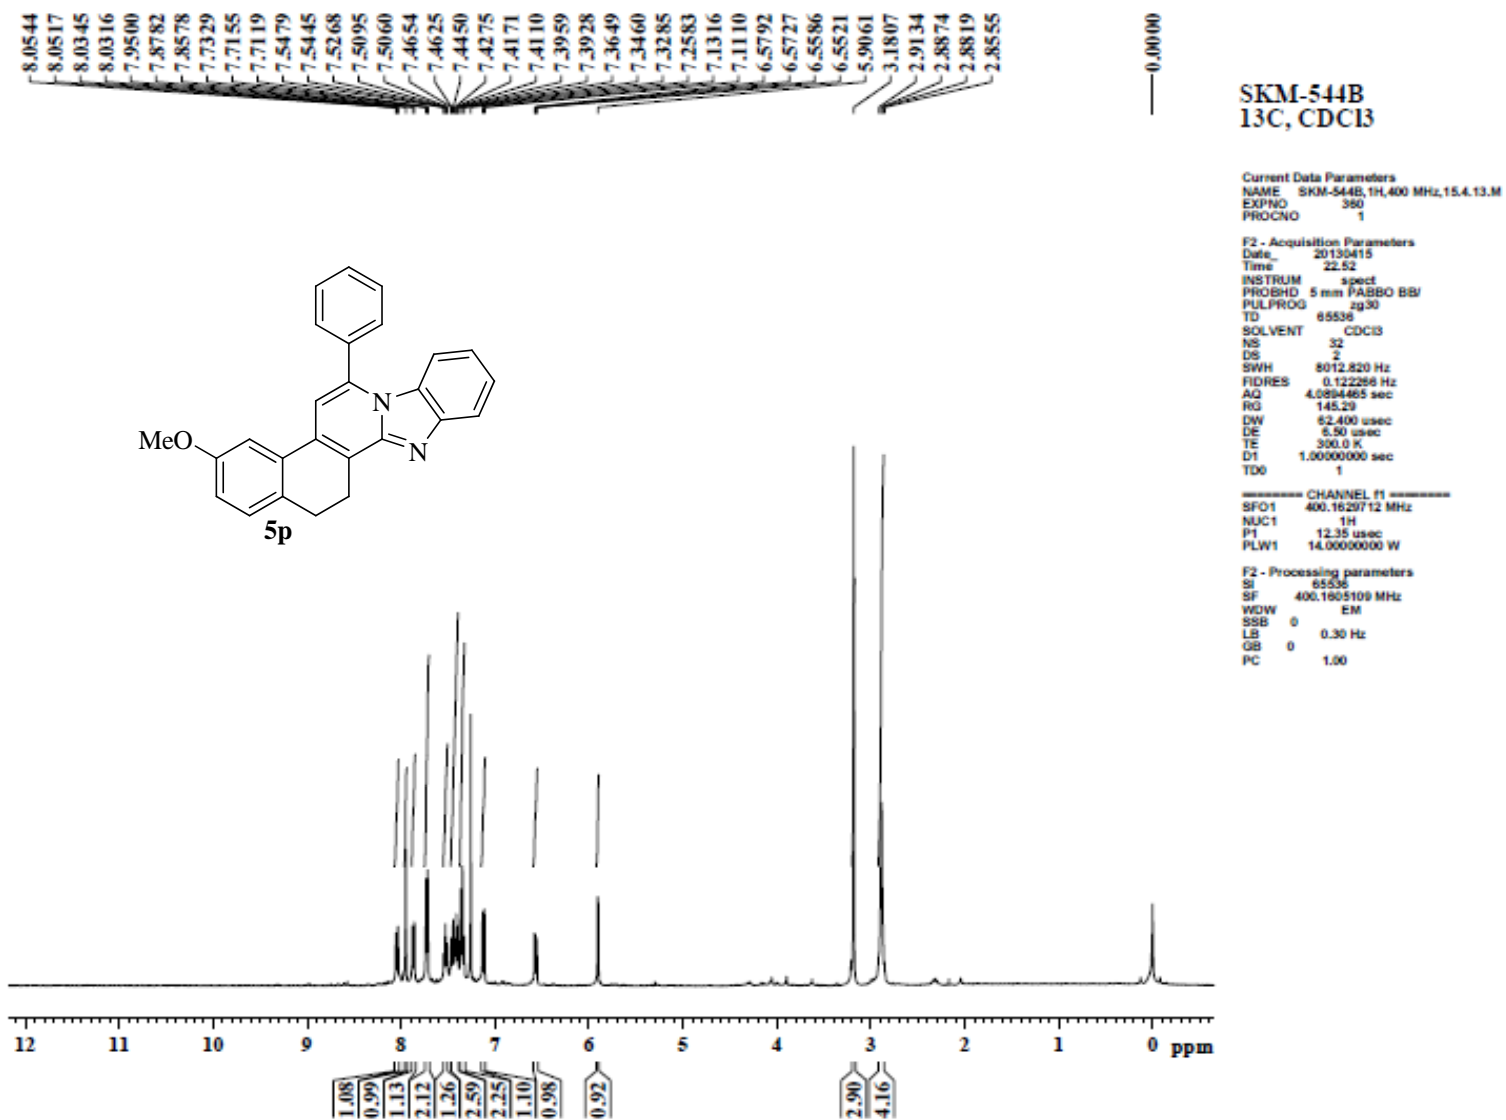

**Figure 64:**  $^1\text{H}$ -NMR Spectrum of **5p**.

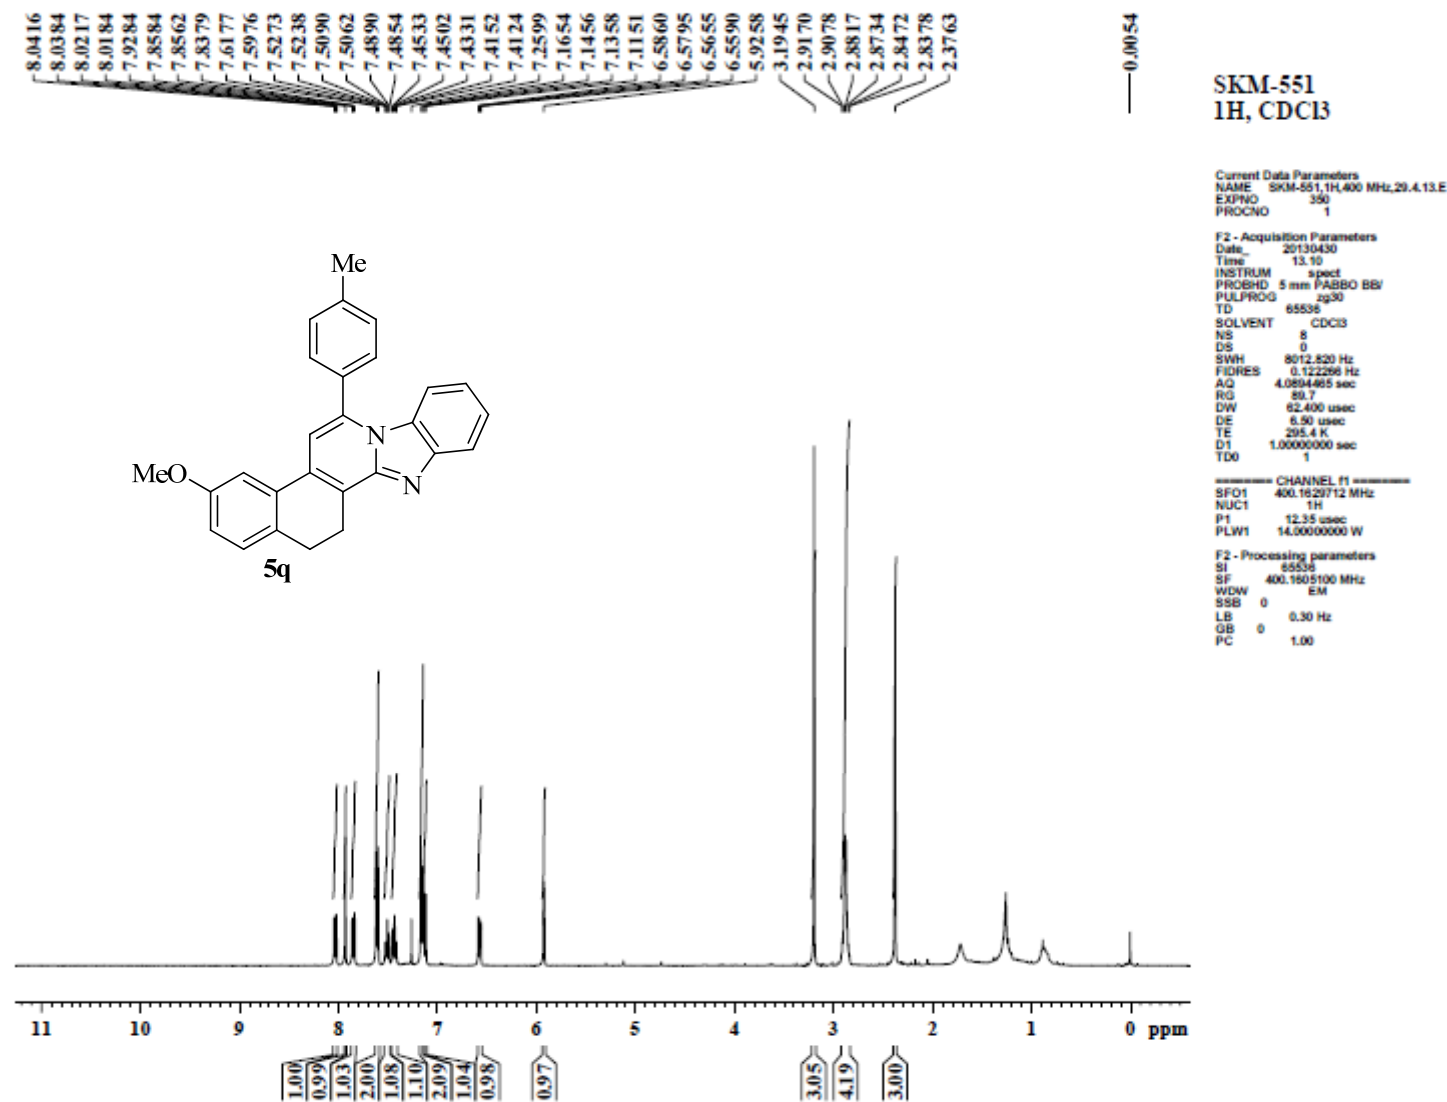

Figure 65: <sup>1</sup>H -NMR Spectrum of 5q.

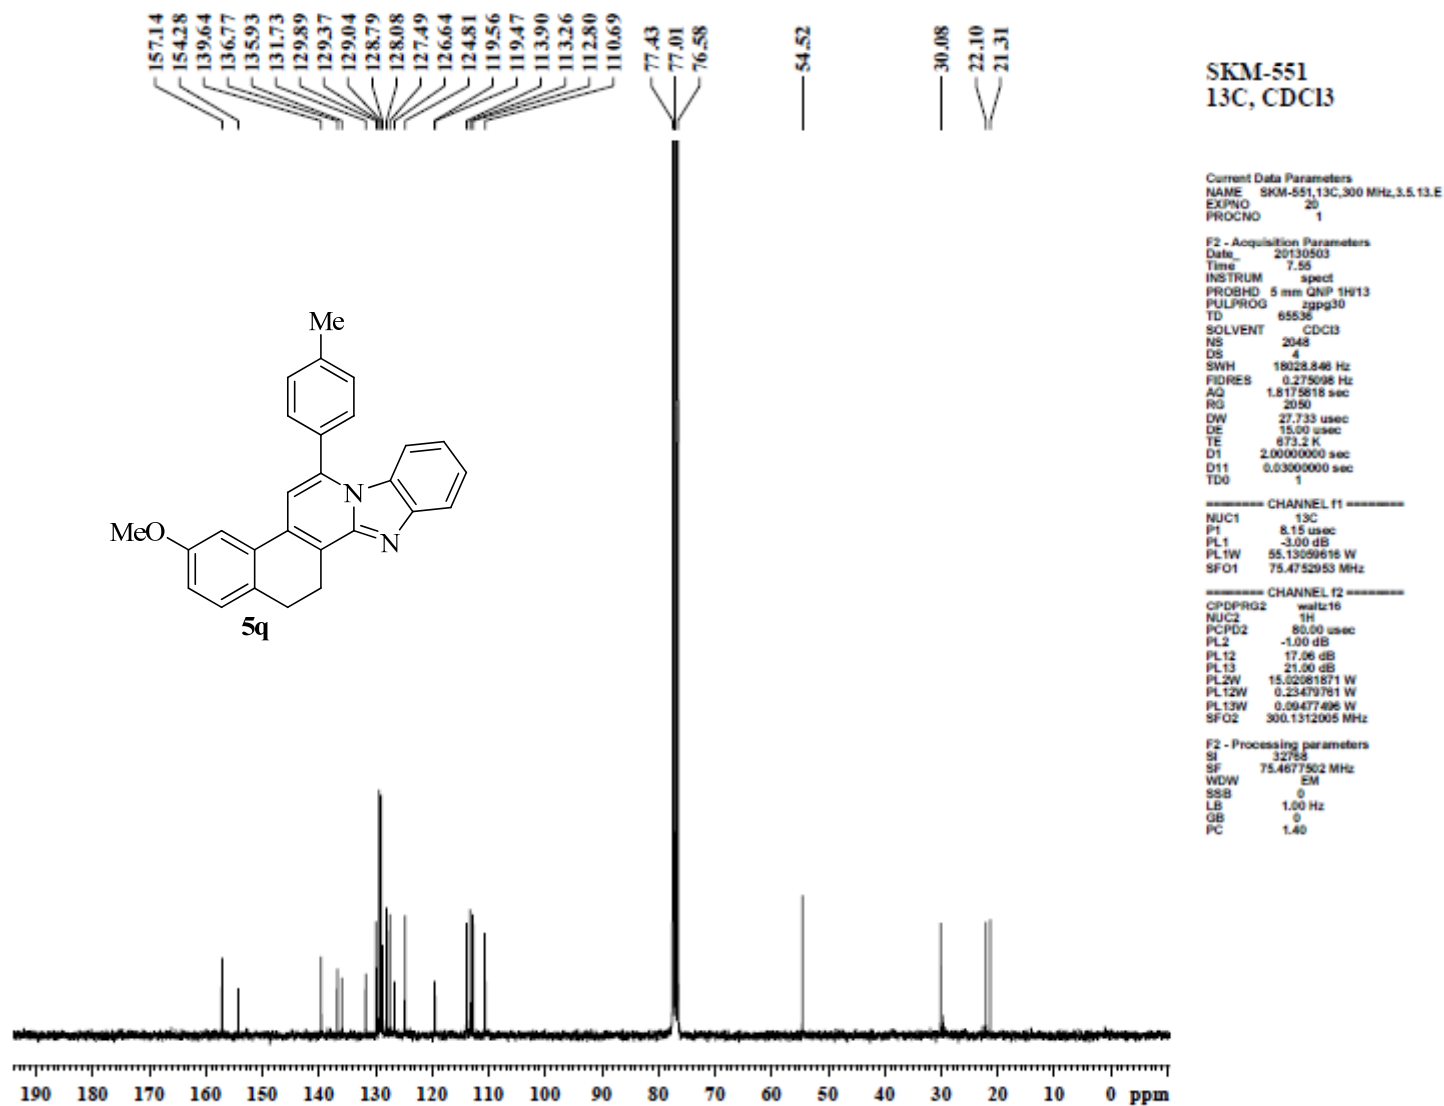

**Figure 66:**  $^{13}\text{C}$  -NMR Spectrum of **5q**.



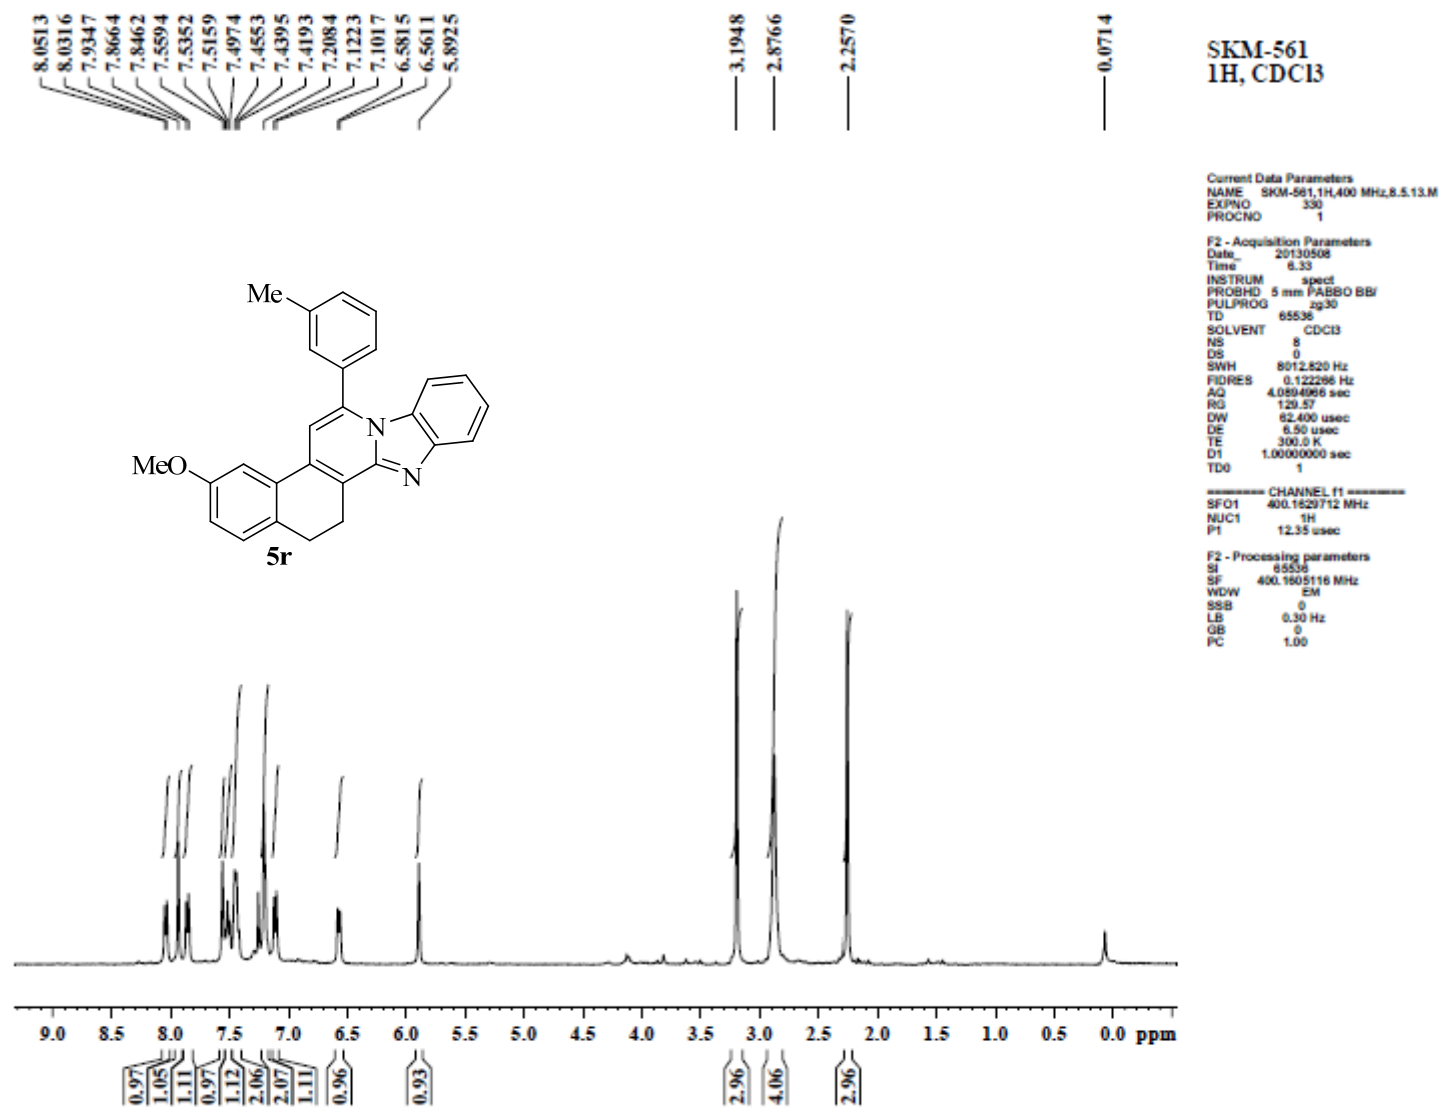

Figure 67: <sup>1</sup>H -NMR Spectrum of **5r**.

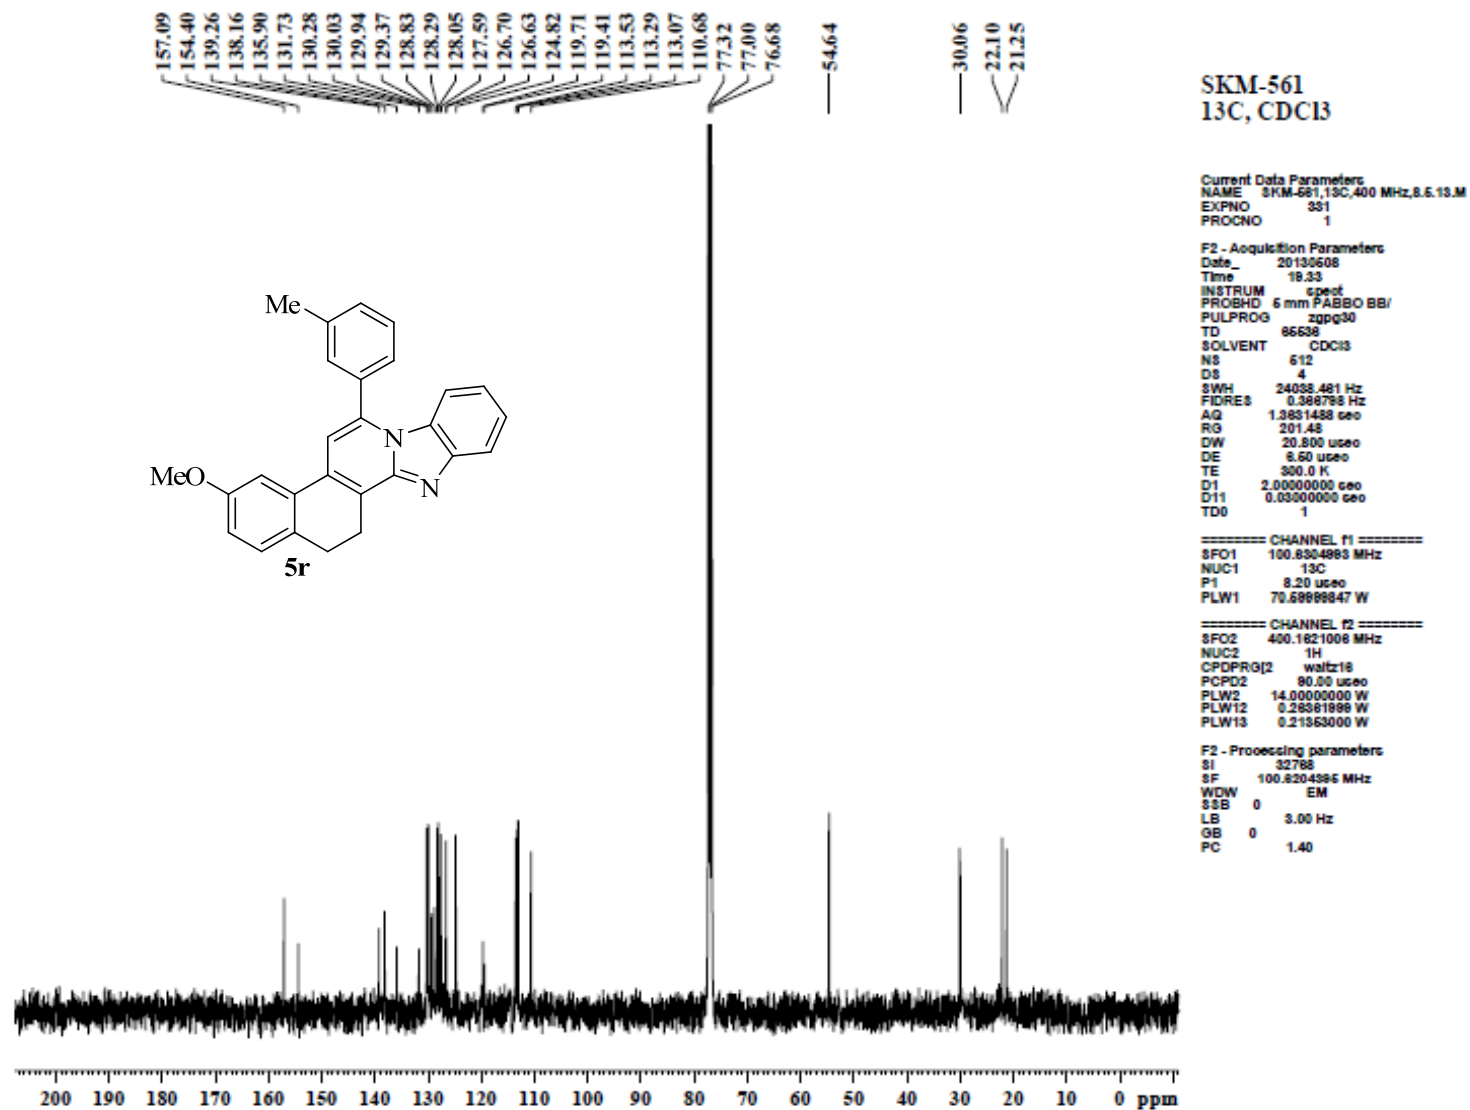

**Figure 68:**  $^{13}\text{C}$  -NMR Spectrum of **5r**.

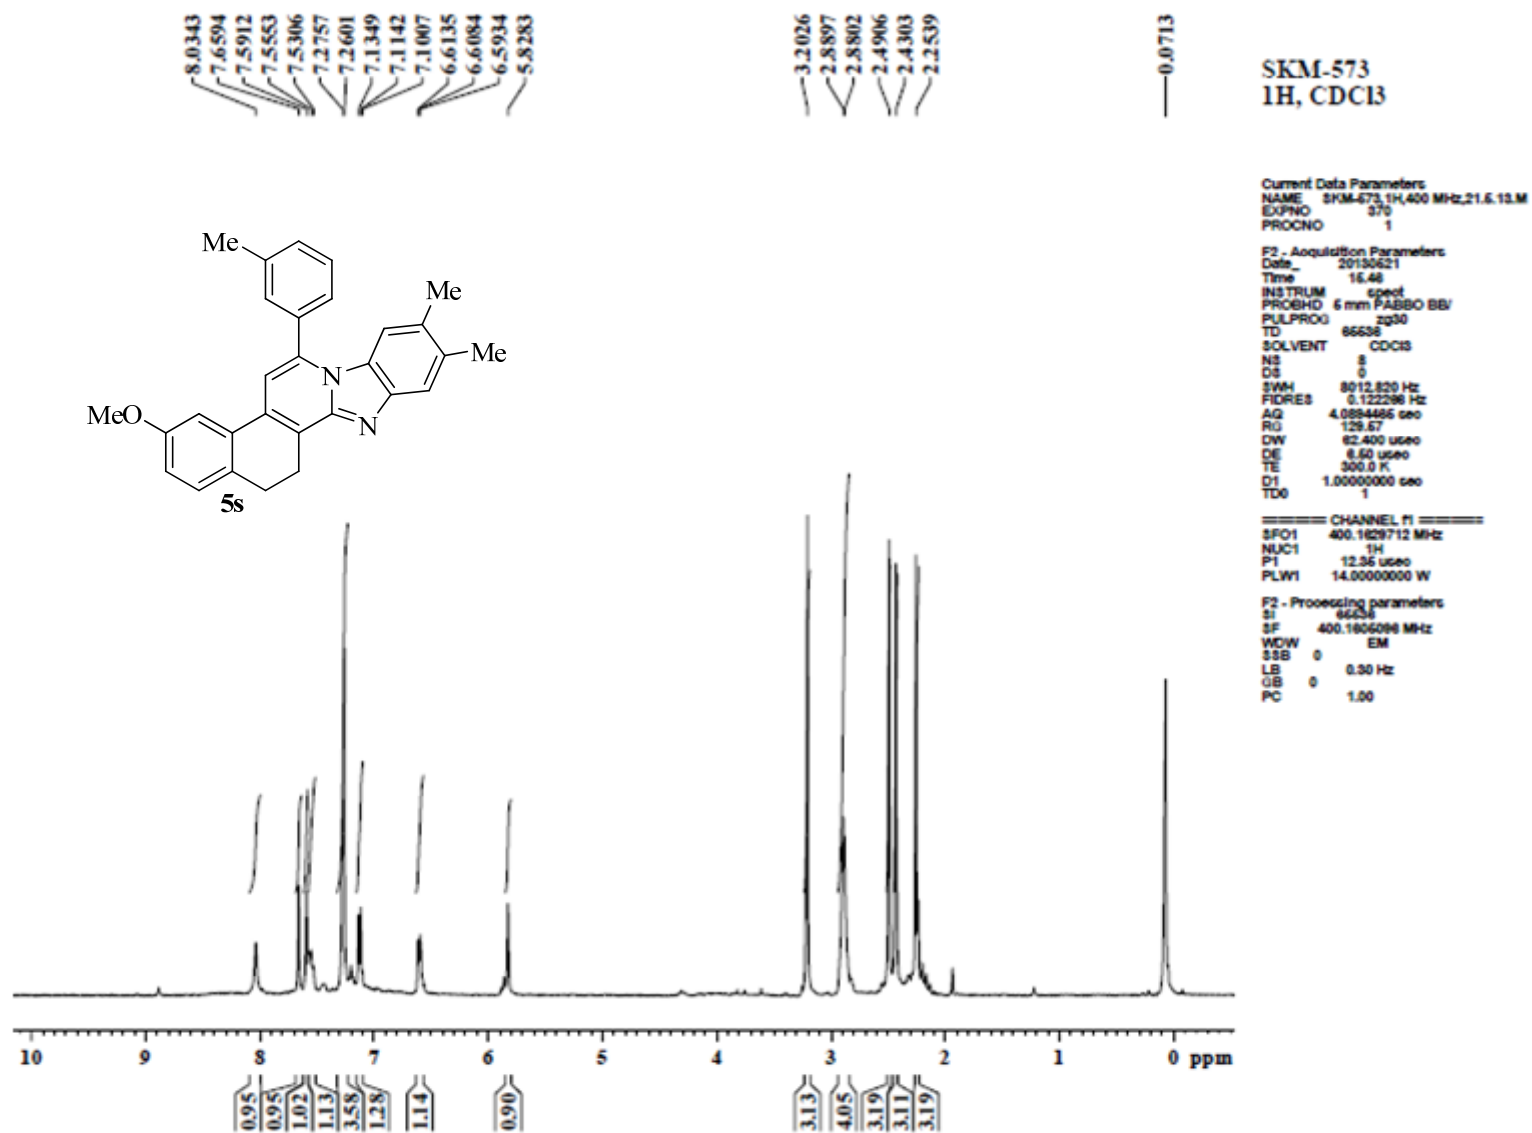

**Figure 69:** <sup>1</sup>H -NMR Spectrum of **5s**.

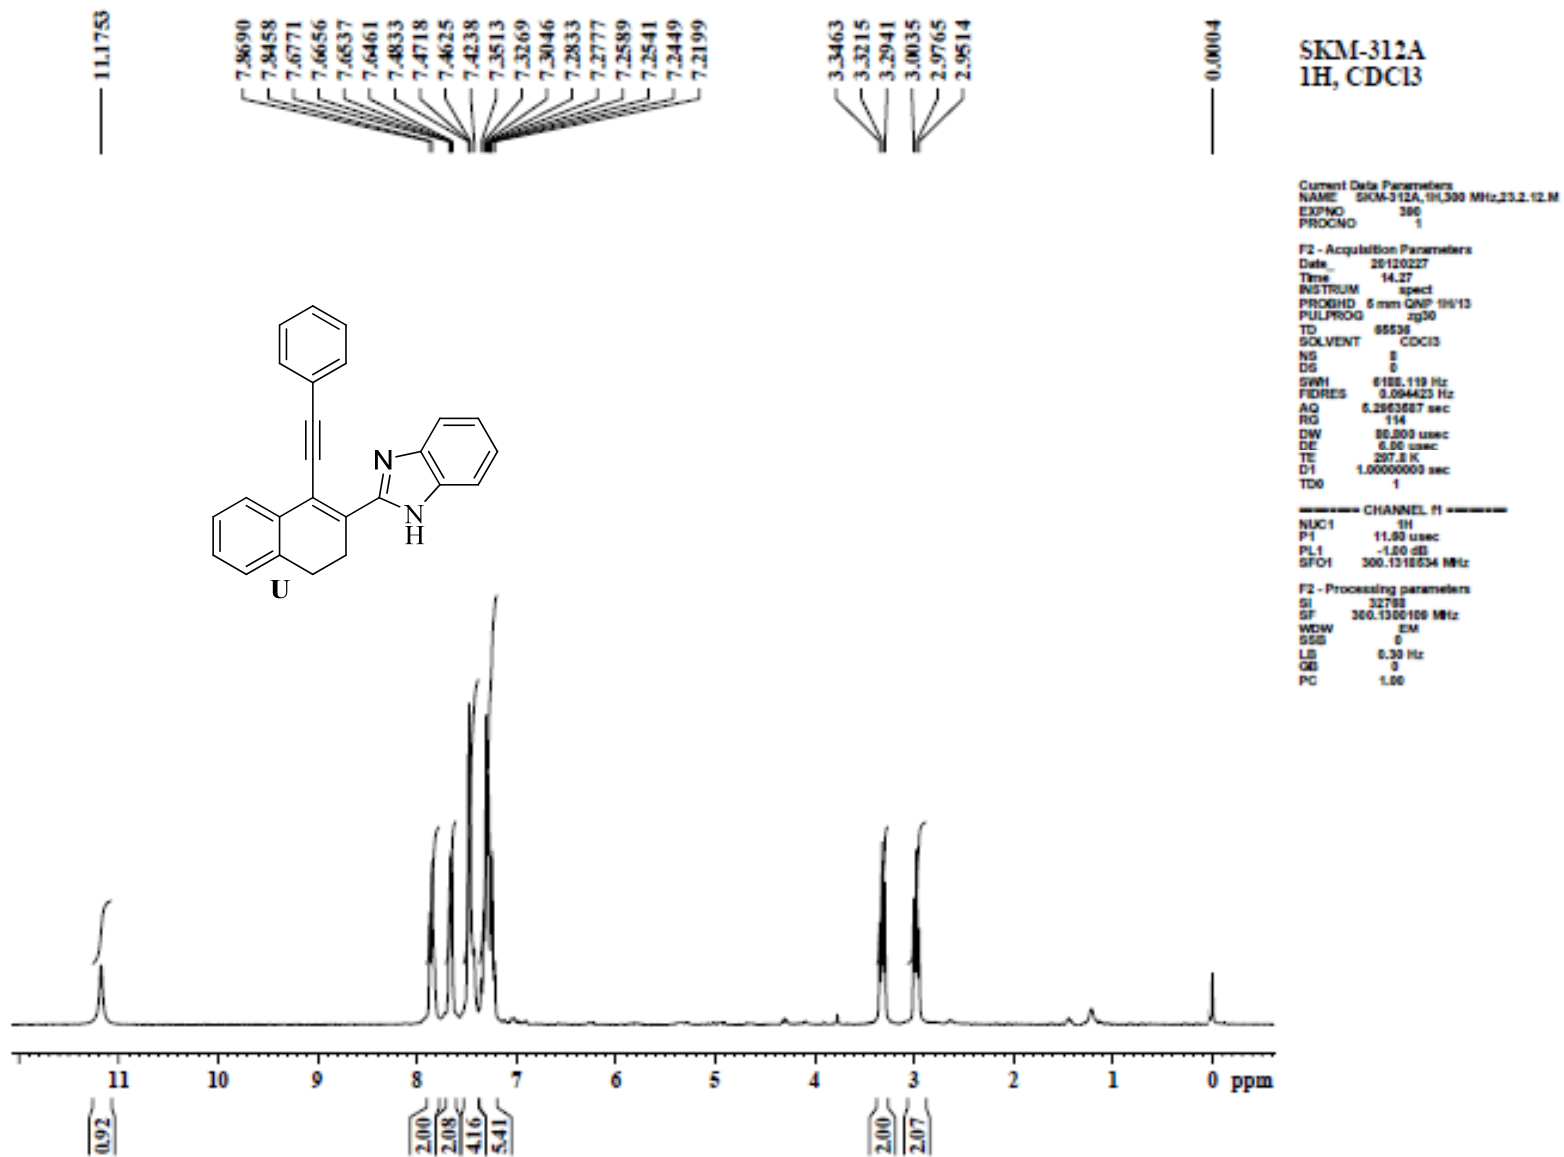

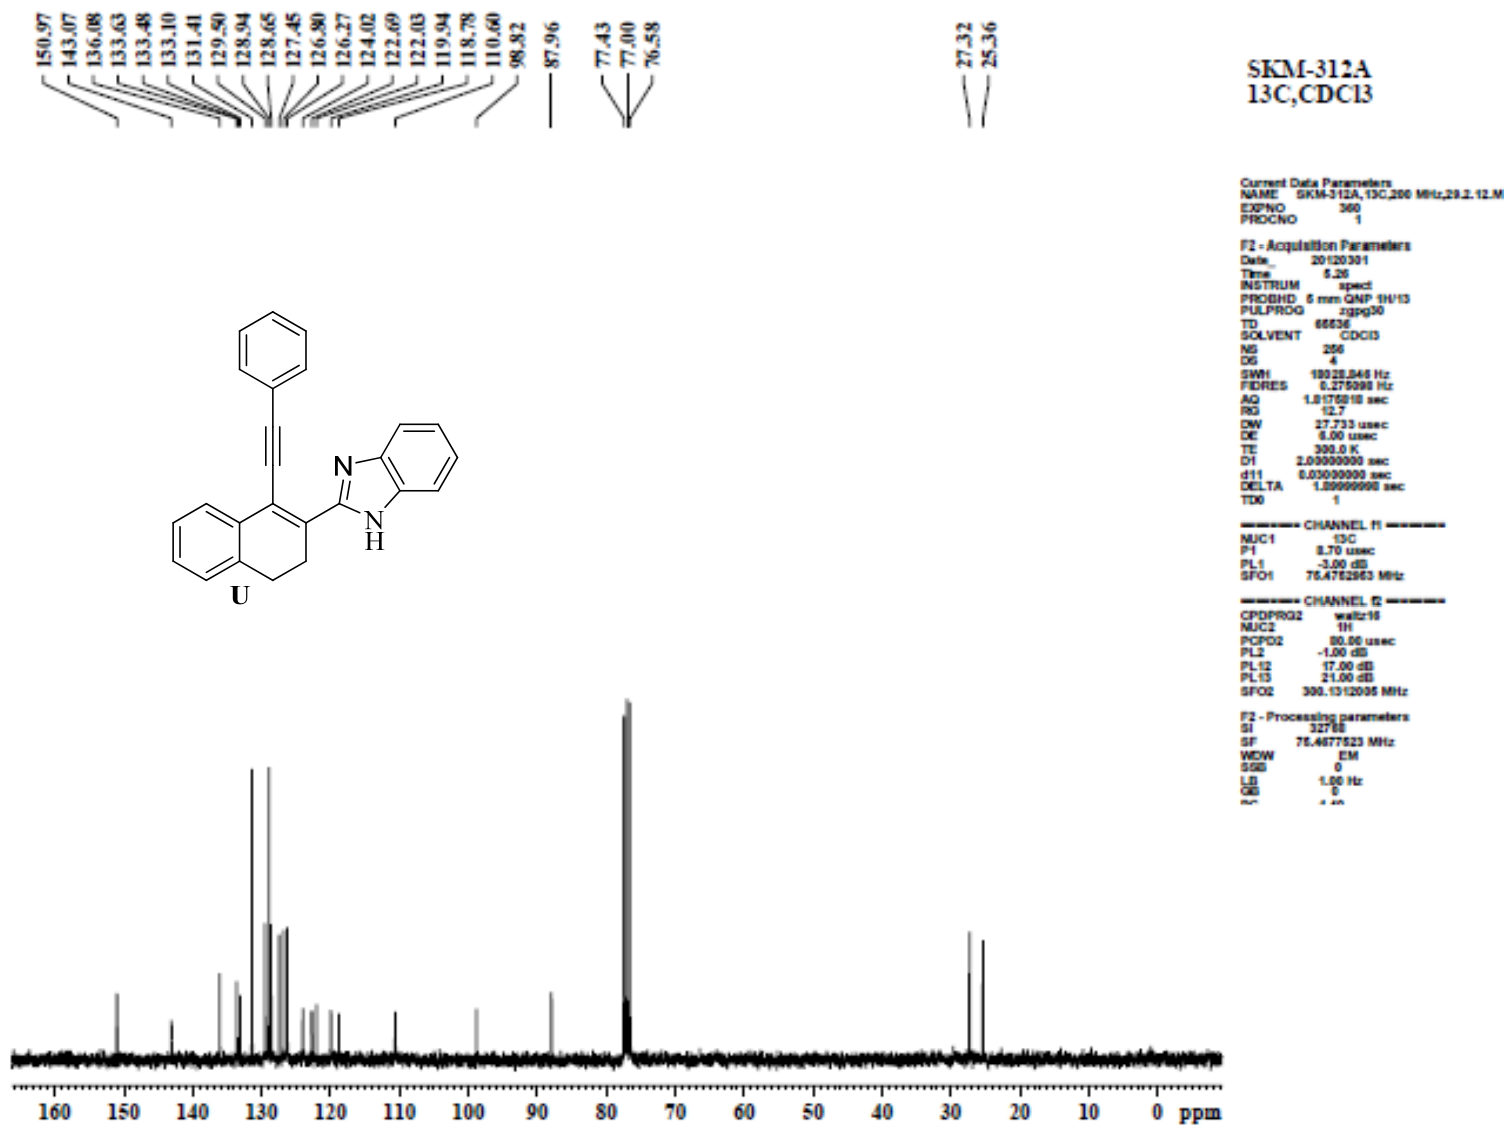

**Figure 71:** <sup>13</sup>C -NMR Spectrum of **U**.

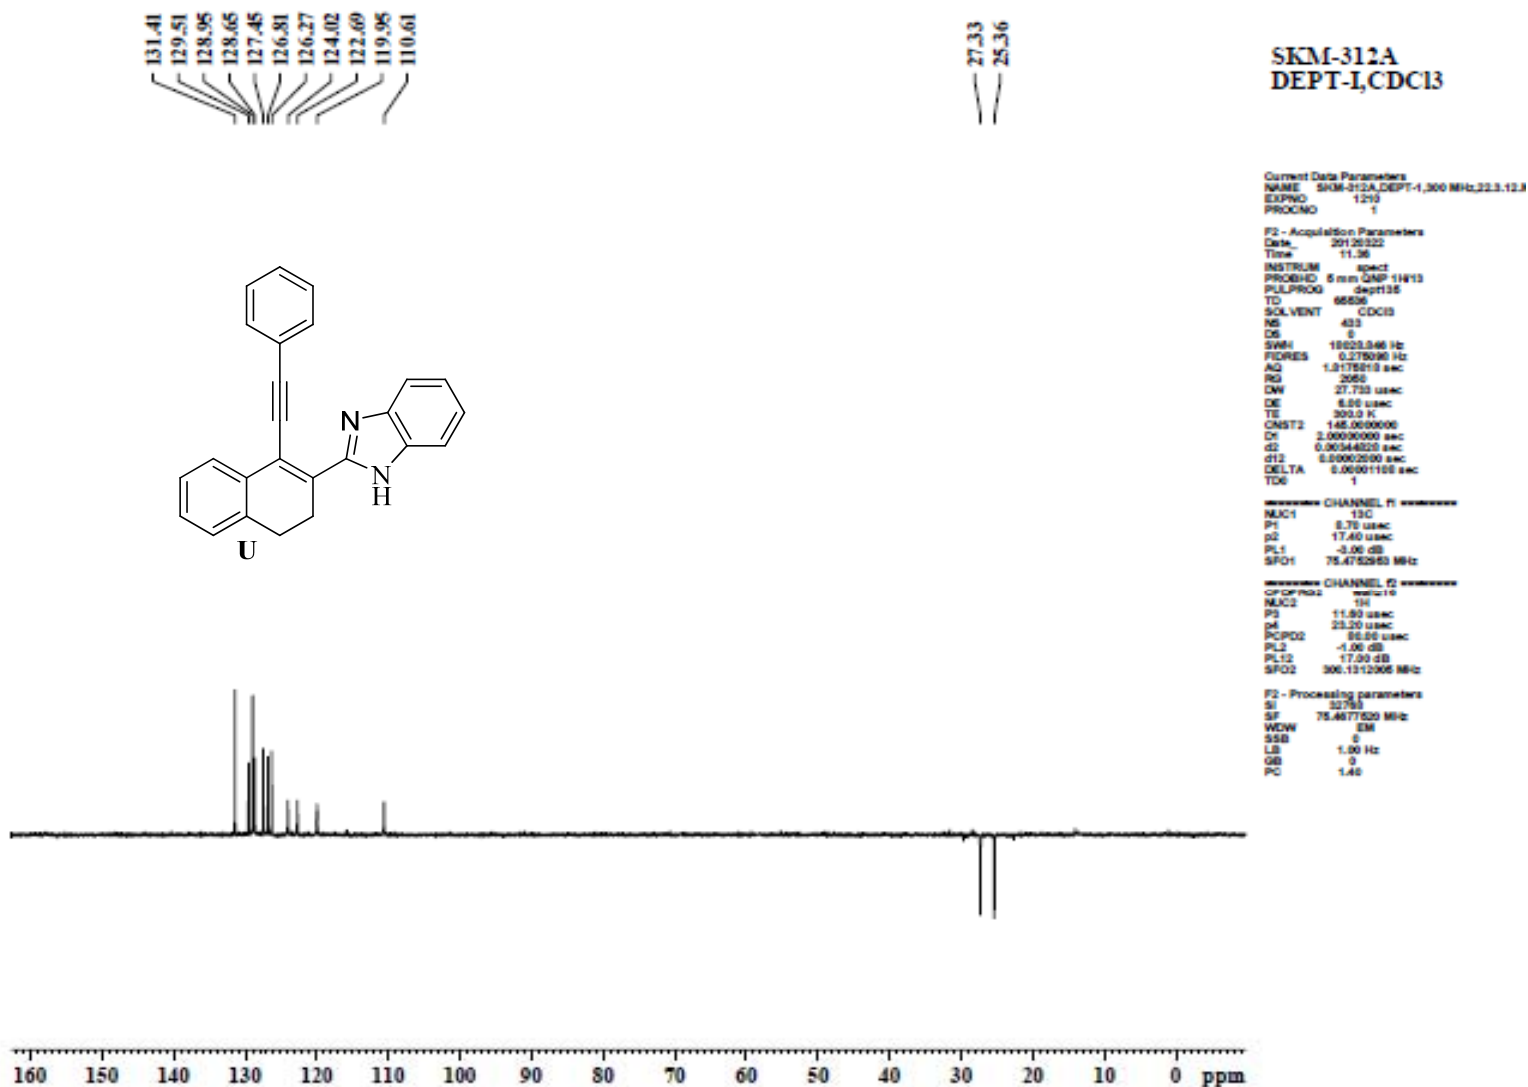

**Figure 72:** DEPT-I -Spectrum of **U**.

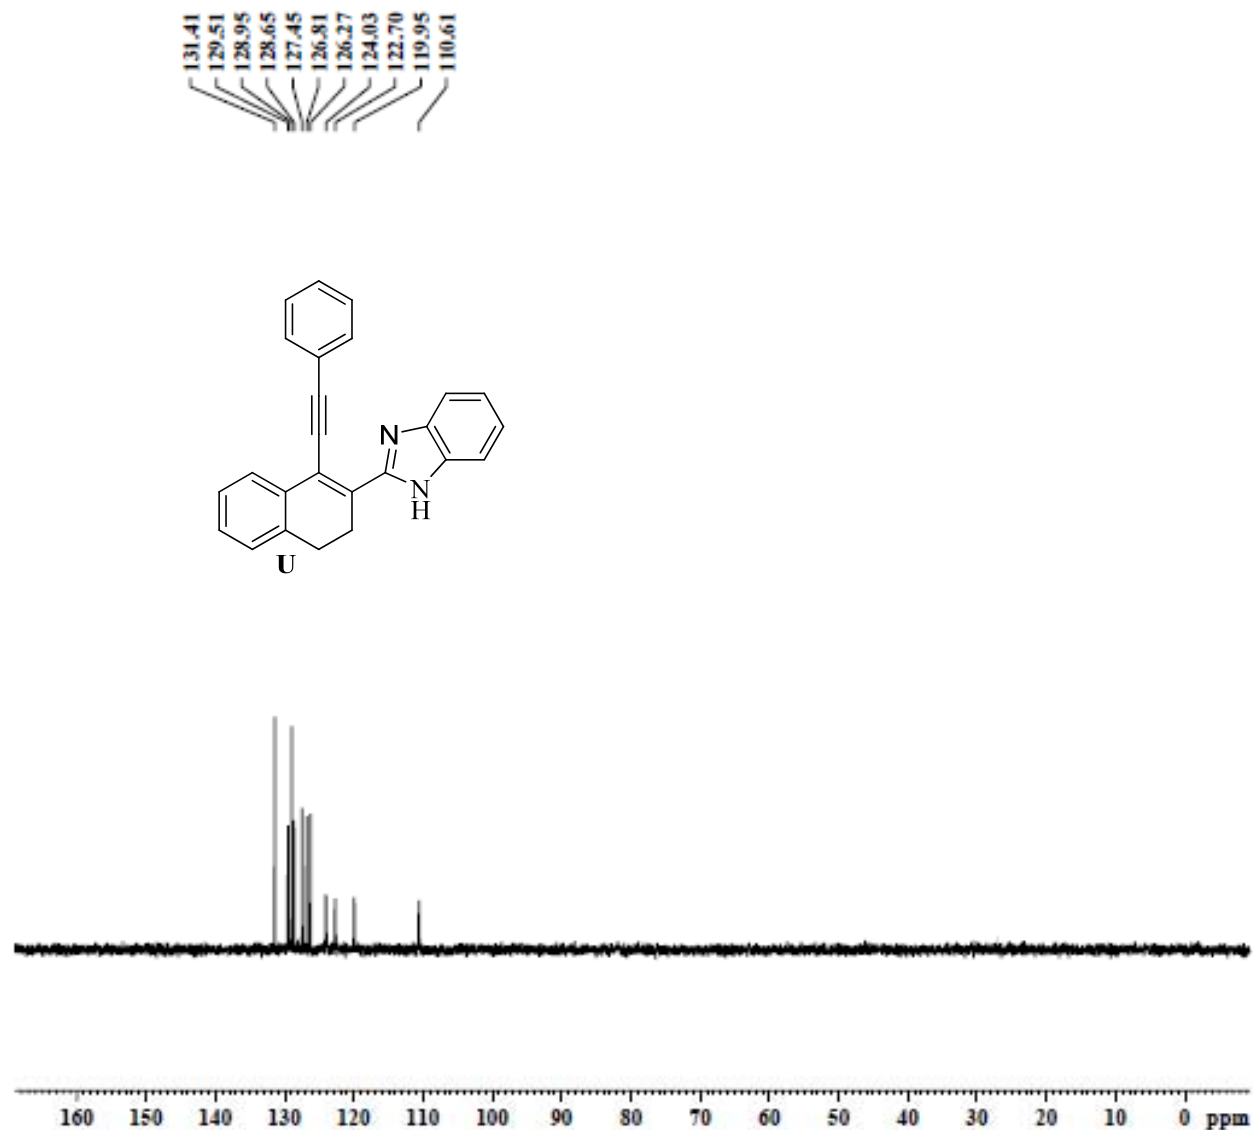

**SKM-312A  
DEPT-II,CDC13**

Current Data Parameters  
 NAME SKM-312A\_DEPT-II,300 MHz,123.12 M  
 EXPNO 1211  
 PROCNO 1

F2 - Acquisition Parameters  
 Date\_ 20120322  
 Time 12.54  
 INSTRUM spect  
 PROBRD 5 mm QNP 1H/13  
 PULPROG dept90  
 TD 65536  
 SOLVENT CDC13  
 NS 118  
 DS 0  
 SWH 18028.848 Hz  
 FIDRES 0.275098 Hz  
 AQ 1.8175818 sec  
 RG 2050  
 DW 27.733 usec  
 DE 6.00 usec  
 TE 300.0 K  
 CNST2 145.9000000  
 D1 2.0000000 sec  
 d2 0.00344828 sec  
 d12 0.00002000 sec  
 DELTA 0.00001100 sec  
 TD0 1

----- CHANNEL f1 -----  
 NUC1 13C  
 P1 8.70 usec  
 p2 17.40 usec  
 PL1 -3.00 dB  
 SFO1 75.4782963 MHz

----- CHANNEL f2 -----  
 CPDPRG2 waHz16  
 NUC2 1H  
 P3 11.80 usec  
 p4 23.20 usec  
 PCPD2 00.00 usec  
 PL2 -1.00 dB  
 PL2z 17.00 dB  
 SFO2 300.1312005 MHz

F2 - Processing parameters  
 SI 32768  
 SF 75.4677620 MHz  
 WDW EM  
 SSB 0  
 LB 1.00 Hz  
 GB 0  
 PC 1.40

**Figure 73: DEPT-II -Spectrum of U.**
